# Supplementary material for: A muscle-epidermis-glia signaling axis sustains synaptic specificity during allometric growth in Caenorhabditis elegans
Source: eLife journal article supplement (doi:10.7554/elife.55890), 2020-04-07
Supplement: supp [file elife-55890-supp-v1.zip]

| Table S2. Strains used in this study |                                                                                                                                                |
|--------------------------------------|------------------------------------------------------------------------------------------------------------------------------------------------|
| Strain name                          | Genotype                                                                                                                                       |
| N2                                   | Wild type                                                                                                                                      |
| TV392                                | <i>wyIs45 [Pttx-3::GFP::rab-3; Punc-122::RFP] X</i>                                                                                            |
| FDU937                               | <i>cima-1(wy84) IV; wyIs45 [Pttx-3::GFP::rab-3; Punc-122::RFP] X</i>                                                                           |
| FDU2215                              | <i>shcEx1126[Pttx-3::syd-1::GFP;Pttx-3::rab-3::mCherry;Punc-122::RFP]</i>                                                                      |
| FDU2216                              | <i>cima-1(wy84) IV;shcEx1127[Pttx-3::syd-1::GFP;Pttx-3::rab-3::mCherry;Punc-122::RFP]</i>                                                      |
| FDU2217                              | <i>cima-1(wy84) IV;mig-17(ols226) V;shcEx1128[Pttx-3::syd-1::GFP;Pttx-3::rab-3::mCherry;Punc-122::RFP]</i>                                     |
| FDU1140                              | <i>shcEx776 [Phlh-17::mCherry; Pttx-3::GFP::rab-3]</i>                                                                                         |
| FDU1784                              | <i>cima-1(wy84) IV; shcEx777 [Phlh-17::mCherry; Pttx-3::GFP::rab-3]</i>                                                                        |
| FDU1785                              | <i>mig-17(ola226) V; shcEx778 [Phlh-17::mCherry; Pttx-3::GFP::rab-3]</i>                                                                       |
| FDU1143                              | <i>cima-1(wy84) IV; mig-17(ola226) V; shcEx780 [Phlh-17::mCherry; Pttx-3::GFP::rab-3]</i>                                                      |
| FDU2095                              | <i>cima-1(wy84) IV; mig-17(ola226) V; wyIs45 [Pttx-3::GFP::rab-3; Punc-122::RFP] X</i>                                                         |
| FDU2333                              | <i>cima-1(wy84) IV; mig-17(ola226) V; wyIs45 [Pttx-3::GFP::rab-3; Punc-122::RFP] X; shcEx1146 [Pmig-17::mig-17 genomics; Phlh-17::mCherry]</i> |
| FDU2334                              | <i>cima-1(wy84) IV; mig-17(ola226) V; wyIs45 [Pttx-3::GFP::rab-3; Punc-122::RFP] X; shcEx1147 [Pmig-17::mig-17 genomics; Phlh-17::mCherry]</i> |
| FDU882                               | <i>cima-1(wy84) IV; mig-17(k113) V; wyls45 [Pttx-3::GFP::rab-3; Punc-122::RFP] X</i>                                                           |
| FDU2315                              | <i>cima-1(wy84) IV; mig-17(k174) V; wyIs45 [Pttx-3::GFP::rab-3; Punc-122::RFP] X</i>                                                           |
| FDU2219                              | <i>shcEx1129[Pmig-17::mig-17::SL2::GFP; Pdpi-4::mCherry]</i>                                                                                   |
| FDU2220                              | <i>shcEx1130[Pmig-17::mig-17::SL2::GFP; Pmyo-3::mCherry]</i>                                                                                   |
| FDU2318                              | <i>shcEx1131[Pmig-17::mig-17::SL2::GFP; Phlh-17::mCherry]</i>                                                                                  |
| FDU2462                              | <i>shcEx1410[Pmig-17::mig-17::SL2::GFP; Prab-3::mCherry]</i>                                                                                   |
| FDU2214                              | <i>cima-1(wy84) IV; mig-17(shc8) V; wyIs45 [Pttx-3::GFP::rab-3; Punc-122::RFP] X</i>                                                           |
| FDU2596                              | <i>cima-1(wy84) IV; mig-17(ola226) V; wyIs45 [Pttx-3::GFP::rab-3; Punc-122::RFP] X; shcEx1414 [Pmig-17::mig-17(E303A); Phlh-17::mCherry]</i>   |
| FDU2597                              | <i>cima-1(wy84) IV; mig-17(ola226) V; wyIs45 [Pttx-3::GFP::rab-3; Punc-122::RFP] X; shcEx 1415 [Pmig-17::mig-17(E303A); Phlh-17::mCherry]</i>  |
| FDU3202                              | <i>cima-1(wy84) IV; mig-17(ola226) V; wyIs45 [Pttx-3::GFP::rab-3; Punc-122::RFP] X; shcEx1682[Prab-3::mig-17; Phlh-17::mCherry]</i>            |
| FDU3203                              | <i>cima-1(wy84) IV; mig-17(ola226) V; wyIs45 [Pttx-3::GFP::rab-3; Punc-122::RFP] X; shcEx1683[Prab-3::mig-17; Phlh-17::mCherry]</i>            |
| FDU1056                              | <i>mig-17(shc19) V</i>                                                                                                                         |
| FDU1778                              | <i>mig-17(shc19) V; shcEx845[Phlh-17::mCherry]</i>                                                                                             |
| FDU2332                              | <i>mig-17(shc19) V; shcEx1145[Pdpi-4::mCherry]</i>                                                                                             |
| FDU1896                              | <i>mig-17(shc19) V; shcEx1402[ Pmyo-3::mCherry]</i>                                                                                            |
| FDU1891                              | <i>mig-17(shc19) V;shcEx1403[Prab-3::mCherry]</i>                                                                                              |
| FDU1518                              | <i>cima-1(wy84) IV; emb-9(xd51) III; wyIs45 [Pttx-3::GFP::rab-3; Punc-122::RFP] X</i>                                                          |

|         |                                                                                                                                                            |
|---------|------------------------------------------------------------------------------------------------------------------------------------------------------------|
| FDU192  | <i>cima-1(wy84)</i> IV; <i>emb-9(tk75)</i> III; <i>wyIs45 [Pttx-3::GFP::rab-3; Punc-122::RFP]</i> X                                                        |
| FDU2945 | <i>cima-1(wy84)</i> IV; <i>emb-9(b189)</i> IV; <i>wyIs45 [Pttx-3::GFP::rab-3; Punc-122::RFP]</i> X                                                         |
| DCR1475 | <i>cima-1(wy84)</i> IV; <i>unc-52(e1421)</i> II; <i>wyIs45 [Pttx-3::GFP::rab-3; Punc-122::RFP]</i> X                                                       |
| FDU38   | <i>cima-1(wy84)</i> IV; <i>fbl-1(k201)</i> IV; <i>wyIs45; [Pttx-3::GFP::rab-3; Punc-122::RFP]</i> X                                                        |
| FDU45   | <i>cima-1(wy84)</i> IV; <i>mig-17(ola226)</i> V; <i>fbl-1(k201)</i> IV; <i>wyIs45 [Pttx-3::GFP::rab-3; Punc-122::RFP]</i> X                                |
| FDU2598 | <i>mig-17(shc19)</i> V; <i>qyIs46[unc119;emb-9::mCherry]</i> X                                                                                             |
| NK364   | <i>unc-119(ed4)</i> III; <i>qyIs46[unc119;emb-9::mCherry]</i> X                                                                                            |
| FDU2593 | <i>cima-1(wy84)</i> IV; <i>qyIs46[unc119;emb-9::mCherry]</i> X                                                                                             |
| FDU2594 | <i>mig-17(ola226)</i> V; <i>qyIs46[unc119;emb-9::mCherry]</i> X                                                                                            |
| FDU2595 | <i>cima-1(wy84)</i> IV; <i>mig-17(ola226)</i> V; <i>qyIs46[unc119;emb-9::mCherry]</i> X                                                                    |
| FDU2314 | <i>mig-17(k174)</i> V; <i>wyIs45 [Pttx-3::GFP::rab-3; Punc-122::RFP]</i> X                                                                                 |
| FDU883  | <i>mig-17(k113)</i> V; <i>wyIs45 [Pttx-3::GFP::rab-3; Punc-122::RFP]</i> X                                                                                 |
| FDU2583 | <i>wyIs45 [Pttx-3::GFP::rab-3; Punc-122::RFP]</i> X; <i>shcEx1252 [Pmig-17::mig-17 genomics; Phlh-17::mCherry]</i>                                         |
| FDU2584 | <i>wyIs45 [Pttx-3::GFP::rab-3; Punc-122::RFP]</i> X; <i>shcEx1253 [Pmig-17::mig-17 genomics; Phlh-17::mCherry]</i>                                         |
| FDU3143 | <i>fbl-1(k201)</i> IV; <i>wyIs45 [Pttx-3::GFP::rab-3; Punc-122::RFP]</i> X; <i>shcEx1686 [Phlh-17::mCherry]</i>                                            |
| FDU3144 | <i>fbl-1(k201)</i> IV; <i>wyIs45 [Pttx-3::GFP::rab-3; Punc-122::RFP]</i> X; <i>shcEx1687 [Phlh-17::mCherry]</i>                                            |
| FDU3192 | <i>fbl-1(k201)</i> IV; <i>wyIs45 [Pttx-3::GFP::rab-3; Punc-122::RFP]</i> X; <i>shcEx1691 [Phlh-17::mCherry]</i>                                            |
| FDU3145 | <i>let-2(b246)</i> X; <i>shcEx1688 [Phlh-17::mCherry]</i>                                                                                                  |
| FDU3146 | <i>let-2(b246)</i> X; <i>shcEx1689 [Phlh-17::mCherry]</i>                                                                                                  |
| FDU3147 | <i>let-2(b246)</i> X; <i>shcEx1690 [Phlh-17::mCherry]</i>                                                                                                  |
| FDU3193 | <i>unc-52(e1421)</i> II; <i>wyIs45 [Pttx-3::GFP::rab-3; Punc-122::RFP]</i> X; <i>shcEx1692 [Phlh-17::mCherry]</i>                                          |
| FDU3194 | <i>unc-52(e1421)</i> II; <i>wyIs45 [Pttx-3::GFP::rab-3; Punc-122::RFP]</i> X; <i>shcEx1693 [Phlh-17::mCherry]</i>                                          |
| FDU1519 | <i>emb-9(xd51)</i> III; <i>wyIs45 [Pttx-3::GFP::rab-3; Punc-122::RFP]</i> X                                                                                |
| FDU2995 | <i>emb-9(b189)</i> IV; <i>wyIs45 [Pttx-3::GFP::rab-3; Punc-122::RFP]</i> X                                                                                 |
| DCR4032 | <i>fbl-1(k201)</i> IV; <i>wyIs45 [Pttx-3::GFP::rab-3; Punc-122::RFP]</i> X                                                                                 |
| DCR1624 | <i>unc-52(gk3)</i> II; <i>wyIs45 [Pttx-3::GFP::rab-3; Punc-122::RFP]</i> X                                                                                 |
| FDU3101 | <i>unc-52(e1421)</i> II; <i>wyIs45 [Pttx-3::GFP::rab-3; Punc-122::RFP]</i> X                                                                               |
| FDU2320 | <i>cima-1(wy84)</i> IV; <i>mig-17(ola226)</i> V; <i>wyIs45 [Pttx-3::GFP::rab-3; Punc-122::RFP]</i> X; <i>shcEx1133 [Pmyo-3::mig-17; Phlh-17::mCherry]</i>  |
| FDU2321 | <i>cima-1(wy84)</i> IV; <i>mig-17(ola226)</i> V; <i>wyIs45 [Pttx-3::GFP::rab-3; Punc-122::RFP]</i> X; <i>shcEx1134 [Pmyo-3::mig-17; Phlh-17::mCherry]</i>  |
| FDU2322 | <i>cima-1(wy84)</i> IV; <i>mig-17(ola226)</i> V; <i>wyIs45 [Pttx-3::GFP::rab-3; Punc-122::RFP]</i> X; <i>shcEx1135 [Pmyo-3::mig-17; Phlh-17::mCherry]</i>  |
| FDU2326 | <i>cima-1(wy84)</i> IV; <i>mig-17(ola226)</i> V; <i>wyIs45 [Pttx-3::GFP::rab-3; Punc-122::RFP]</i> X; <i>shcEx1139 [Phlh-17::mig-17; Phlh-17::mCherry]</i> |
| FDU2327 | <i>cima-1(wy84)</i> IV; <i>mig-17(ola226)</i> V; <i>wyIs45 [Pttx-3::GFP::rab-3; Punc-122::RFP]</i> X; <i>shcEx1140 [Phlh-17::mig-17; Phlh-17::mCherry]</i> |

|         |                                                                                                                                                                                             |
|---------|---------------------------------------------------------------------------------------------------------------------------------------------------------------------------------------------|
| FDU2329 | <i>cima-1(wy84)</i> IV; <i>mig-17(ola226)</i> V; <i>wyIs45</i> [ <i>Pttx-3::GFP::rab-3</i> ; <i>Punc-122::RFP</i> ] X; <i>shcEx1142</i> [ <i>Pdpy-7::mig-17</i> ; <i>Phlh-17::mCherry</i> ] |
| FDU2330 | <i>cima-1(wy84)</i> IV; <i>mig-17(ola226)</i> V; <i>wyIs45</i> [ <i>Pttx-3::GFP::rab-3</i> ; <i>Punc-122::RFP</i> ] X; <i>shcEx1143</i> [ <i>Pdpy-7::mig-17</i> ; <i>Phlh-17::mCherry</i> ] |
| FDU3195 | <i>cima-1(wy84)</i> IV; <i>mig-17(ola226)</i> V; <i>wyIs45</i> [ <i>Pttx-3::GFP::rab-3</i> ; <i>Punc-122::RFP</i> ] X; <i>shcEx1675</i> [ <i>Pttx-3::mig-17</i> ; <i>Phlh-17::mCherry</i> ] |
| FDU3196 | <i>cima-1(wy84)</i> IV; <i>mig-17(ola226)</i> V; <i>wyIs45</i> [ <i>Pttx-3::GFP::rab-3</i> ; <i>Punc-122::RFP</i> ] X; <i>shcEx1676</i> [ <i>Plim-4::mig-17</i> ; <i>Phlh-17::mCherry</i> ] |
| FDU3197 | <i>cima-1(wy84)</i> IV; <i>mig-17(ola226)</i> V; <i>wyIs45</i> [ <i>Pttx-3::GFP::rab-3</i> ; <i>Punc-122::RFP</i> ] X; <i>shcEx1677</i> [ <i>Plim-4::mig-17</i> ; <i>Phlh-17::mCherry</i> ] |
| FDU3198 | <i>cima-1(wy84)</i> IV; <i>mig-17(ola226)</i> V; <i>wyIs45</i> [ <i>Pttx-3::GFP::rab-3</i> ; <i>Punc-122::RFP</i> ] X; <i>shcEx1678</i> [ <i>Plim-4::mig-17</i> ; <i>Phlh-17::mCherry</i> ] |
| FDU3199 | <i>cima-1(wy84)</i> IV; <i>mig-17(ola226)</i> V; <i>wyIs45</i> [ <i>Pttx-3::GFP::rab-3</i> ; <i>Punc-122::RFP</i> ] X; <i>shcEx1679</i> [ <i>Plim-4::mig-17</i> ; <i>Phlh-17::mCherry</i> ] |
| FDU3204 | <i>cima-1(wy84)</i> IV; <i>mig-17(ola226)</i> V; <i>wyIs45</i> [ <i>Pttx-3::GFP::rab-3</i> ; <i>Punc-122::RFP</i> ] X; <i>shcEx1684</i> [ <i>Pttx-3::mig-17</i> ; <i>Phlh-17::mCherry</i> ] |
| FDU3205 | <i>cima-1(wy84)</i> IV; <i>mig-17(ola226)</i> V; <i>wyIs45</i> [ <i>Pttx-3::GFP::rab-3</i> ; <i>Punc-122::RFP</i> ] X; <i>shcEx1685</i> [ <i>Pttx-3::mig-17</i> ; <i>Phlh-17::mCherry</i> ] |
| FDU3207 | <i>unc-119(ed4)</i> III; <i>qyIs46</i> [ <i>unc119;emb-9::mCherry</i> ] X; <i>shcEx1695</i> [ <i>Pmyo-3::GFP</i> ]                                                                          |
| FDU3208 | <i>unc-119(ed4)</i> III; <i>qyIs46</i> [ <i>unc119;emb-9::mCherry</i> ] X; <i>shcEx1696</i> [ <i>Pmyo-3::GFP</i> ]                                                                          |
| FDU3209 | <i>unc-119(ed4)</i> III; <i>qyIs46</i> [ <i>unc119;emb-9::mCherry</i> ] X; <i>shcEx1697</i> [ <i>Pttx-3::GFP</i> ]                                                                          |
| FDU3210 | <i>unc-119(ed4)</i> III; <i>qyIs46</i> [ <i>unc119;emb-9::mCherry</i> ] X; <i>shcEx1698</i> [ <i>Pttx-3::GFP</i> ]                                                                          |
| FDU3211 | <i>unc-119(ed4)</i> III; <i>qyIs46</i> [ <i>unc119;emb-9::mCherry</i> ] X; <i>shcEx1699</i> [ <i>Phlh-17::GFP</i> ]                                                                         |
