# Supplementary material for: A muscle-epidermis-glia signaling axis sustains synaptic specificity during allometric growth in Caenorhabditis elegans
Source: eLife journal article supplement (doi:10.7554/elife.55890), 2020-04-07
Supplement: supp [file elife-55890-supp-v1.zip]

Table S1 the results of MS

| Accession | Gene names                                                        | N2 repeat 1 | N2 repeat 2 | N2 repeat 3 | average | mig-17(ola226) repeat 1 | mig-17(ola226) repeat 2 | mig-17(ola226) repeat 3 | average | fold change |
|-----------|-------------------------------------------------------------------|-------------|-------------|-------------|---------|-------------------------|-------------------------|-------------------------|---------|-------------|
| Q20877    | CELE_F56D3.1 F56D3.1                                              | 0.81        | 0.56        | 0.00        | 0.46    | 0.19                    | 0.00                    | 0.00                    | 0.06    | 0.14        |
| P30629    | ZK637.2                                                           | 1.00        | 1.00        | 0.36        | 0.79    | 0.00                    | 0.00                    | 0.50                    | 0.17    | 0.21        |
| Q20049    | idhg-1 CELE_F35G12.2 F35G12.2                                     | 0.42        | 1.00        | 0.00        | 0.47    | 0.41                    | 0.00                    | 0.00                    | 0.14    | 0.29        |
| Q21742    | CELE_R05F9.6 R05F9.6                                              | 0.33        | 0.00        | 1.00        | 0.44    | 0.43                    | 0.00                    | 0.00                    | 0.14    | 0.32        |
| Q9XW20    | CELE_Y18D10A.11 Y18D10A.11                                        | 0.35        | 0.00        | 1.00        | 0.45    | 0.44                    | 0.00                    | 0.00                    | 0.15    | 0.32        |
| Q09482    | C18H9.3/C18H9.2                                                   | 0.00        | 1.00        | 0.33        | 0.44    | 0.00                    | 0.00                    | 0.44                    | 0.15    | 0.33        |
| Q2EEM8    | ttr-45 CELE_JC8.14 JC8.14                                         | 0.27        | 0.47        | 0.56        | 0.43    | 0.48                    | 0.00                    | 0.00                    | 0.16    | 0.37        |
| Q20223    | lbp-1 F40F4.3                                                     | 0.00        | 0.33        | 0.57        | 0.30    | 0.00                    | 0.38                    | 0.00                    | 0.13    | 0.41        |
| Q44144    | perm-4 C44B12.5 CELE_C44B12.5                                     | 0.34        | 0.50        | 1.00        | 0.61    | 0.38                    | 0.39                    | 0.00                    | 0.26    | 0.42        |
| Q22015    | CELE_R31.2 R31.2                                                  | 0.00        | 0.00        | 0.51        | 0.17    | 0.00                    | 0.00                    | 0.21                    | 0.07    | 0.42        |
| Q9GUF2    | acp-6 CELE_Y73B6BL.24 Y73B6BL.24                                  | 0.00        | 0.34        | 0.50        | 0.28    | 0.00                    | 0.38                    | 0.00                    | 0.13    | 0.46        |
| G5EGA7    | ras-2 Ras2 CELE_F17C8.4 F17C8.4                                   | 0.00        | 0.25        | 0.00        | 0.08    | 0.00                    | 0.11                    | 0.00                    | 0.04    | 0.46        |
| Q45006    | CELE_W03D8.9 W03D8.9                                              | 1.00        | 0.00        | 0.18        | 0.39    | 0.00                    | 0.00                    | 0.55                    | 0.18    | 0.46        |
| P34654    | ZK632.9                                                           | 0.00        | 0.51        | 0.00        | 0.17    | 0.00                    | 0.24                    | 0.00                    | 0.08    | 0.47        |
| Q9Y0V6    | tin-10 tim-10 Y66D12A.22                                          | 0.00        | 0.00        | 0.68        | 0.23    | 0.00                    | 0.00                    | 0.33                    | 0.11    | 0.48        |
| Q9XWU9    | CELE_Y37D8A.19 Y37D8A.19                                          | 0.50        | 0.00        | 0.41        | 0.30    | 0.20                    | 0.00                    | 0.24                    | 0.15    | 0.48        |
| O76618    | cars-1 CELE_Y23H5A.7 Y23H5A.7                                     | 0.00        | 0.00        | 0.49        | 0.16    | 0.00                    | 0.00                    | 0.24                    | 0.08    | 0.49        |
| Q9UB28    | let-805 CELE_H19M22.2 H19M22.2                                    | 0.28        | 0.00        | 0.59        | 0.29    | 0.45                    | 0.00                    | 0.00                    | 0.15    | 0.52        |
| Q966D6    | mct-2 mct-1 C01B4.9 CELE_C01B4.9 CELE_Y19D10A.12 Y19D10A.12       | 0.00        | 1.00        | 0.00        | 0.33    | 0.00                    | 0.53                    | 0.00                    | 0.18    | 0.53        |
| P91340    | CELE_F55F8.2 F55F8.2                                              | 0.00        | 0.00        | 0.55        | 0.18    | 0.00                    | 0.00                    | 0.30                    | 0.10    | 0.53        |
| Q22782    | rab-6.2 T25G12.4                                                  | 0.00        | 0.64        | 0.00        | 0.21    | 0.00                    | 0.36                    | 0.00                    | 0.12    | 0.57        |
| P91280    | CELE_F27C1.6 F27C1.6                                              | 0.00        | 0.00        | 0.55        | 0.18    | 0.00                    | 0.00                    | 0.32                    | 0.11    | 0.57        |
| Q18032    | C15H9.9 CELE_C15H9.9                                              | 0.28        | 1.00        | 0.31        | 0.53    | 0.47                    | 0.00                    | 0.44                    | 0.30    | 0.57        |
| O44954    | sdha-2 C34B2.7 CELE_C34B2.7                                       | 0.50        | 0.00        | 0.00        | 0.17    | 0.29                    | 0.00                    | 0.00                    | 0.10    | 0.59        |
| O44572    | tmi-4 W03F8.1                                                     | 0.00        | 0.00        | 0.62        | 0.21    | 0.00                    | 0.00                    | 0.38                    | 0.13    | 0.60        |
| Q20277    | fipr-21 CELE_F41E7.5 F41E7.5                                      | 0.35        | 0.51        | 0.34        | 0.40    | 0.37                    | 0.00                    | 0.37                    | 0.25    | 0.62        |
| G5EFB5    | cpn-1 CELE_F43G9.9 F43G9.9                                        | 0.50        | 0.46        | 0.31        | 0.42    | 0.25                    | 0.15                    | 0.40                    | 0.27    | 0.63        |
| Q17435    | pfid-4 tag-317 B0035.4                                            | 0.55        | 0.32        | 0.00        | 0.29    | 0.00                    | 0.56                    | 0.00                    | 0.19    | 0.64        |
| Q9XWK2    | CELE_Y54E5A.5 Y54E5A.5                                            | 0.46        | 0.48        | 0.78        | 0.57    | 0.37                    | 0.35                    | 0.40                    | 0.37    | 0.65        |
| Q21322    | mp-2 CELE_K08D10.4 K08D10.4                                       | 0.00        | 0.30        | 0.00        | 0.10    | 0.00                    | 0.20                    | 0.00                    | 0.07    | 0.65        |
| O45430    | mccc-1 CELE_F32B6.2 F32B6.2                                       | 0.31        | 0.31        | 0.00        | 0.21    | 0.00                    | 0.42                    | 0.00                    | 0.14    | 0.67        |
| O44145    | perm-2 C44B12.1 CELE_C44B12.1                                     | 0.28        | 0.16        | 0.65        | 0.36    | 0.34                    | 0.41                    | 0.00                    | 0.25    | 0.69        |
| Q9GZH3    | T22D1.3                                                           | 0.15        | 1.00        | 0.41        | 0.52    | 0.58                    | 0.00                    | 0.52                    | 0.37    | 0.71        |
| Q9XWT3    | ule-5 CELE_Y62H9A.6 Y62H9A.6                                      | 0.36        | 0.55        | 0.00        | 0.30    | 0.39                    | 0.26                    | 0.00                    | 0.22    | 0.71        |
| Q94148    | rab-10 T23H2.5                                                    | 0.00        | 0.58        | 0.00        | 0.19    | 0.00                    | 0.42                    | 0.00                    | 0.14    | 0.72        |
| O17891    | CELE_F55B11.2 F55B11.2                                            | 0.00        | 0.00        | 0.45        | 0.15    | 0.00                    | 0.00                    | 0.33                    | 0.11    | 0.72        |
| Q23028    | CELE_R09F10.5 R09F10.5                                            | 0.60        | 0.46        | 0.46        | 0.50    | 0.40                    | 0.33                    | 0.37                    | 0.37    | 0.73        |
| Q9XXK7    | tram-1 C24F3.1 CELE_C24F3.1                                       | 0.00        | 0.45        | 0.00        | 0.15    | 0.00                    | 0.34                    | 0.00                    | 0.11    | 0.76        |
| P41847    | T20B12.7                                                          | 0.53        | 0.44        | 0.00        | 0.32    | 0.35                    | 0.39                    | 0.00                    | 0.25    | 0.77        |
| P34640    | ZK512.2                                                           | 0.00        | 0.57        | 0.00        | 0.19    | 0.00                    | 0.43                    | 0.00                    | 0.14    | 0.77        |
| G5EET8    | pud-1.2 pud-1.1 CELE_F15E11.13 CELE_Y19D10B.7 F15E11.13 Y19D10B.7 | 0.36        | 0.35        | 0.37        | 0.36    | 0.27                    | 0.29                    | 0.26                    | 0.28    | 0.77        |
| Q9BKU8    | moag-4 CELE_Y37E3.4 Y37E3.4                                       | 0.00        | 0.00        | 0.43        | 0.14    | 0.00                    | 0.00                    | 0.34                    | 0.11    | 0.78        |
| Q94053    | msp-78 T13F2.11                                                   | 0.55        | 0.57        | 0.31        | 0.48    | 0.40                    | 0.36                    | 0.36                    | 0.37    | 0.78        |
| Q21774    | adsl-1 R06C7.5                                                    | 0.41        | 0.00        | 0.00        | 0.14    | 0.32                    | 0.00                    | 0.00                    | 0.11    | 0.79        |
| Q9TYV5    | nol-1 CELE_W07E6.1 W07E6.1                                        | 0.00        | 0.48        | 0.45        | 0.31    | 0.00                    | 0.73                    | 0.00                    | 0.24    | 0.79        |
| Q9N4I3    | CELE_Y71F9AL.9 Y71F9AL.9                                          | 0.41        | 0.38        | 0.32        | 0.37    | 0.44                    | 0.50                    | 0.39                    | 0.44    | 1.20        |
| Q9NAR3    | col-124 C24F3.6 CELE_C24F3.6                                      | 0.31        | 0.34        | 0.35        | 0.33    | 0.26                    | 0.49                    | 0.46                    | 0.40    | 1.20        |
| Q9N4N4    | swsn-6 CELE_ZK616.4 ZK616.4                                       | 0.36        | 0.00        | 0.00        | 0.12    | 0.44                    | 0.00                    | 0.00                    | 0.15    | 1.20        |

|        |                                |      |      |      |      |      |      |      |      |      |
|--------|--------------------------------|------|------|------|------|------|------|------|------|------|
| Q9TZ33 | ucr-2.3 CELE_T24C4.1 T24C4.1   | 0.00 | 0.32 | 0.38 | 0.23 | 0.00 | 0.43 | 0.42 | 0.28 | 1.20 |
| P19625 | mic-1 C36E6.3                  | 0.00 | 0.00 | 0.45 | 0.15 | 0.00 | 0.00 | 0.55 | 0.18 | 1.21 |
| Q9XVS1 | tag-72 C25A1.3                 | 0.00 | 0.00 | 0.45 | 0.15 | 0.00 | 0.00 | 0.55 | 0.18 | 1.21 |
| Q9XXE2 | CELE_Y44A6D.2 Y44A6D.2         | 0.00 | 0.37 | 0.00 | 0.12 | 0.00 | 0.44 | 0.00 | 0.15 | 1.21 |
| P34685 | cap-1 D2024.6                  | 0.29 | 0.00 | 0.37 | 0.22 | 0.45 | 0.00 | 0.35 | 0.27 | 1.21 |
| O62053 | C08F11.11                      | 0.33 | 0.34 | 0.32 | 0.33 | 0.42 | 0.39 | 0.40 | 0.40 | 1.21 |
| H2KZV8 | mlp-1 CELE_T04C9.4 T04C9.4     | 0.35 | 0.34 | 0.33 | 0.34 | 0.44 | 0.39 | 0.41 | 0.41 | 1.21 |
| Q20588 | F49C12.11                      | 0.00 | 0.29 | 0.00 | 0.10 | 0.00 | 0.36 | 0.00 | 0.12 | 1.22 |
| O01805 | acbp-1 C44E4.6                 | 0.32 | 0.39 | 0.34 | 0.35 | 0.44 | 0.42 | 0.43 | 0.43 | 1.22 |
| Q27481 | uba-1 C47E12.5 CELE_C47E12.5   | 0.35 | 0.33 | 0.39 | 0.35 | 0.40 | 0.47 | 0.42 | 0.43 | 1.22 |
| P91303 | vha-10 F46F11.5                | 0.34 | 0.35 | 0.34 | 0.34 | 0.42 | 0.41 | 0.42 | 0.41 | 1.22 |
| Q93568 | CELE_F25H2.4 F25H2.4           | 0.00 | 0.00 | 0.45 | 0.15 | 0.00 | 0.00 | 0.55 | 0.18 | 1.22 |
| Q9N2W7 | Y94H6A.8                       | 0.00 | 0.00 | 0.34 | 0.11 | 0.00 | 0.00 | 0.41 | 0.14 | 1.22 |
| Q95PZ1 | CELE_Y67H2A.5 Y67H2A.5         | 0.31 | 0.39 | 0.38 | 0.36 | 0.46 | 0.43 | 0.43 | 0.44 | 1.22 |
| Q21962 | CELE_R12C12.1 R12C12.1         | 0.38 | 0.26 | 0.00 | 0.21 | 0.39 | 0.39 | 0.00 | 0.26 | 1.22 |
| Q9NLD1 | hrp-2 CELE_F58D5.1 F58D5.1     | 0.33 | 0.32 | 0.38 | 0.34 | 0.43 | 0.43 | 0.40 | 0.42 | 1.22 |
| Q95017 | ubc-9 F29B9.6                  | 0.00 | 0.32 | 0.00 | 0.11 | 0.00 | 0.39 | 0.00 | 0.13 | 1.23 |
| Q86NE1 | asp-2 CELE_T18H9.2 T18H9.2     | 0.32 | 0.36 | 0.35 | 0.34 | 0.42 | 0.42 | 0.42 | 0.42 | 1.23 |
| P34339 | egl-45 eif-3.A C27D11.1        | 0.28 | 0.32 | 0.40 | 0.33 | 0.40 | 0.41 | 0.41 | 0.41 | 1.23 |
| Q95YB2 | acdh-9 CELE_F28A10.6 F28A10.6  | 0.00 | 0.47 | 0.29 | 0.25 | 0.00 | 0.47 | 0.46 | 0.31 | 1.23 |
| Q94010 | CELE_T08G11.1 T08G11.1         | 0.45 | 0.53 | 0.37 | 0.45 | 0.55 | 0.47 | 0.63 | 0.55 | 1.23 |
| O45569 | nep-17 CELE_F54F11.2 F54F11.2  | 0.00 | 0.00 | 0.34 | 0.11 | 0.00 | 0.00 | 0.41 | 0.14 | 1.23 |
| Q17698 | C06A8.3 CELE_C06A8.3           | 0.31 | 0.32 | 0.32 | 0.32 | 0.39 | 0.38 | 0.39 | 0.39 | 1.23 |
| G5ECW7 | dpt-1 CELE_F02E9.9 F02E9.9     | 0.00 | 0.00 | 0.41 | 0.14 | 0.00 | 0.00 | 0.50 | 0.17 | 1.23 |
| P18835 | col-19 ZK1193.1                | 0.29 | 0.00 | 0.00 | 0.10 | 0.36 | 0.00 | 0.00 | 0.12 | 1.24 |
| Q19766 | tomm-20 F23H12.2               | 0.30 | 0.29 | 0.34 | 0.31 | 0.38 | 0.43 | 0.35 | 0.38 | 1.24 |
| O17328 | mct-6 C10E2.6 CELE_C10E2.6     | 0.37 | 0.37 | 0.00 | 0.24 | 0.51 | 0.40 | 0.00 | 0.30 | 1.24 |
| P55956 | asp-3 H22K11.1                 | 0.32 | 0.35 | 0.34 | 0.34 | 0.42 | 0.42 | 0.42 | 0.42 | 1.24 |
| P91027 | chdp-1 C10G11.7 CELE_C10G11.7  | 0.30 | 0.42 | 0.31 | 0.34 | 0.46 | 0.33 | 0.50 | 0.43 | 1.24 |
| Q09936 | C53C9.2                        | 0.32 | 0.32 | 0.33 | 0.32 | 0.41 | 0.38 | 0.41 | 0.40 | 1.24 |
| Q22352 | CELE_T08H10.1 T08H10.1         | 0.33 | 0.36 | 0.33 | 0.34 | 0.46 | 0.37 | 0.44 | 0.42 | 1.24 |
| P31161 | sod-2 sdm-1 F10D11.1           | 0.32 | 0.31 | 0.45 | 0.36 | 0.44 | 0.46 | 0.45 | 0.45 | 1.24 |
| Q9N408 | ddp-1 tim-8 Y39A3CR.4          | 0.43 | 0.27 | 0.44 | 0.38 | 0.57 | 0.43 | 0.41 | 0.47 | 1.24 |
| O02115 | pcn-1 W03D2.4                  | 0.37 | 0.32 | 0.24 | 0.31 | 0.34 | 0.40 | 0.42 | 0.39 | 1.25 |
| G3MU83 | math-33 CELE_H19N07.2 H19N07.2 | 0.32 | 0.32 | 0.37 | 0.33 | 0.43 | 0.42 | 0.40 | 0.42 | 1.25 |
| P55955 | trr-16 Y5F2A.1                 | 0.54 | 0.28 | 0.30 | 0.37 | 0.52 | 0.44 | 0.43 | 0.46 | 1.25 |
| Q9U296 | men-1 CELE_Y48B6A.12 Y48B6A.12 | 0.00 | 0.00 | 0.38 | 0.13 | 0.00 | 0.00 | 0.47 | 0.16 | 1.25 |
| Q20774 | dnj-13 CELE_F54D5.8 F54D5.8    | 0.00 | 0.00 | 0.34 | 0.11 | 0.00 | 0.00 | 0.43 | 0.14 | 1.25 |
| P91306 | cey-2 CELE_F46F11.2 F46F11.2   | 0.33 | 0.35 | 0.32 | 0.33 | 0.41 | 0.43 | 0.41 | 0.42 | 1.25 |
| Q19826 | rpb-8 F26F4.11                 | 0.35 | 0.00 | 0.00 | 0.12 | 0.44 | 0.00 | 0.00 | 0.15 | 1.25 |
| Q9XXS2 | set-22 CELE_Y32F6A.1 Y32F6A.1  | 0.00 | 0.00 | 0.35 | 0.12 | 0.00 | 0.00 | 0.44 | 0.15 | 1.25 |
| O02323 | lbp-7 T22G5.2                  | 0.32 | 0.00 | 0.31 | 0.21 | 0.43 | 0.00 | 0.36 | 0.26 | 1.26 |
| Q17820 | aos-1 C08B6.9                  | 0.00 | 0.33 | 0.00 | 0.11 | 0.00 | 0.41 | 0.00 | 0.14 | 1.26 |
| O44955 | C34B2.8 CELE_C34B2.8           | 0.00 | 0.32 | 0.00 | 0.11 | 0.00 | 0.40 | 0.00 | 0.13 | 1.26 |
| Q21217 | gta-1 K04D7.3                  | 0.34 | 0.31 | 0.33 | 0.33 | 0.41 | 0.40 | 0.42 | 0.41 | 1.26 |
| O17607 | ruvb-1 C27H6.2                 | 0.30 | 0.36 | 0.34 | 0.33 | 0.43 | 0.40 | 0.42 | 0.42 | 1.26 |
| Q27535 | ZC434.8                        | 0.32 | 0.34 | 0.35 | 0.34 | 0.40 | 0.44 | 0.43 | 0.42 | 1.26 |
| Q19842 | pcca-1 F27D9.5                 | 0.33 | 0.42 | 0.28 | 0.35 | 0.47 | 0.36 | 0.47 | 0.43 | 1.26 |
| Q20107 | fkf-1 CELE_F36H1.1 F36H1.1     | 0.35 | 0.00 | 0.00 | 0.12 | 0.44 | 0.00 | 0.00 | 0.15 | 1.26 |
| Q20310 | CELE_F42A10.5 F42A10.5         | 0.39 | 0.00 | 0.29 | 0.22 | 0.42 | 0.00 | 0.43 | 0.28 | 1.26 |

|        |                                   |      |      |      |      |      |      |      |      |      |
|--------|-----------------------------------|------|------|------|------|------|------|------|------|------|
| Q22235 | enpl-1 T05E11.3                   | 0.31 | 0.36 | 0.34 | 0.34 | 0.41 | 0.42 | 0.45 | 0.43 | 1.26 |
| P34388 | nrps-9 F09G8.3                    | 0.00 | 0.04 | 0.00 | 0.01 | 0.00 | 0.05 | 0.00 | 0.02 | 1.26 |
| Q93714 | idha-1 F43G9.1                    | 0.33 | 0.34 | 0.35 | 0.34 | 0.44 | 0.42 | 0.43 | 0.43 | 1.26 |
| O62388 | CELE_W01D2.1 W01D2.1              | 0.34 | 0.32 | 0.33 | 0.33 | 0.41 | 0.42 | 0.41 | 0.41 | 1.27 |
| Q2XN18 | spp-14 CELE_K09F5.3 K09F5.3       | 0.35 | 0.31 | 0.31 | 0.32 | 0.35 | 0.43 | 0.44 | 0.41 | 1.27 |
| Q21763 | CELE_R05H5.3 R05H5.3              | 0.35 | 0.28 | 0.38 | 0.34 | 0.44 | 0.45 | 0.40 | 0.43 | 1.27 |
| Q21000 | myo-5 CELE_F58G4.1 F58G4.1        | 0.35 | 0.30 | 0.51 | 0.39 | 0.54 | 0.47 | 0.46 | 0.49 | 1.27 |
| H2FLH2 | unc-22 CELE_ZK617.1 ZK617.1       | 0.25 | 0.37 | 0.40 | 0.34 | 0.43 | 0.41 | 0.45 | 0.43 | 1.27 |
| Q9XU97 | CELE_F44E5.1 F44E5.1              | 0.37 | 0.32 | 0.28 | 0.32 | 0.36 | 0.43 | 0.45 | 0.41 | 1.27 |
| Q18599 | acer-1 C44B7.10 CELE_C44B7.10     | 0.33 | 0.29 | 0.33 | 0.32 | 0.41 | 0.42 | 0.38 | 0.40 | 1.27 |
| Q22037 | hrp-1 rbp-1 F42A6.7               | 0.34 | 0.35 | 0.36 | 0.35 | 0.43 | 0.49 | 0.42 | 0.45 | 1.27 |
| O45924 | Y39E4A.3                          | 0.32 | 0.33 | 0.32 | 0.32 | 0.43 | 0.43 | 0.37 | 0.41 | 1.27 |
| Q22781 | acdh-7 CELE_T25G12.5 T25G12.5     | 0.36 | 0.36 | 0.29 | 0.34 | 0.41 | 0.43 | 0.45 | 0.43 | 1.27 |
| Q23445 | ZK180.4                           | 0.33 | 0.00 | 0.00 | 0.11 | 0.42 | 0.00 | 0.00 | 0.14 | 1.27 |
| Q19264 | F09E5.3                           | 0.33 | 0.00 | 0.34 | 0.22 | 0.44 | 0.00 | 0.42 | 0.29 | 1.28 |
| Q09359 | ZK1307.1                          | 0.35 | 0.34 | 0.32 | 0.34 | 0.43 | 0.42 | 0.44 | 0.43 | 1.28 |
| Q9XXU9 | vha-11 Y38F2AL.3                  | 0.39 | 0.34 | 0.32 | 0.35 | 0.46 | 0.43 | 0.46 | 0.45 | 1.28 |
| P34462 | vha-14 F55H2.2                    | 0.31 | 0.47 | 0.30 | 0.36 | 0.42 | 0.53 | 0.43 | 0.46 | 1.28 |
| P52009 | cyn-1 cyp-1 Y49A3A.5              | 0.38 | 0.30 | 0.30 | 0.33 | 0.42 | 0.43 | 0.40 | 0.42 | 1.28 |
| G5ED41 | cand-1 Y102A5A.1                  | 0.00 | 0.00 | 0.30 | 0.10 | 0.00 | 0.00 | 0.38 | 0.13 | 1.28 |
| O01602 | nuo-2 CELE_T10E9.7 T10E9.7        | 0.00 | 0.00 | 0.32 | 0.11 | 0.00 | 0.00 | 0.42 | 0.14 | 1.28 |
| Q23280 | daf-41 p23 ZC395.10               | 0.28 | 0.51 | 0.28 | 0.36 | 0.46 | 0.45 | 0.46 | 0.46 | 1.28 |
| Q10453 | his-71 F45E1.6                    | 0.28 | 0.52 | 0.29 | 0.36 | 0.48 | 0.48 | 0.44 | 0.47 | 1.28 |
| O62289 | ttr-51 CELE_JC8.8 JC8.8           | 0.34 | 0.31 | 0.33 | 0.33 | 0.41 | 0.43 | 0.42 | 0.42 | 1.28 |
| P53596 | sucl-1 C05G5.4                    | 0.36 | 0.32 | 0.34 | 0.34 | 0.41 | 0.47 | 0.43 | 0.44 | 1.28 |
| Q09508 | sdha-1 C03G5.1/D2021.3            | 0.35 | 0.41 | 0.34 | 0.37 | 0.52 | 0.44 | 0.46 | 0.47 | 1.28 |
| Q20239 | aagr-3 CELE_F40F9.6 F40F9.6       | 0.00 | 0.44 | 0.00 | 0.15 | 0.00 | 0.56 | 0.00 | 0.19 | 1.29 |
| Q93353 | idhb-1 C37E2.1                    | 0.35 | 0.36 | 0.31 | 0.34 | 0.43 | 0.47 | 0.41 | 0.44 | 1.29 |
| Q20922 | col-159 CELE_F57B1.3 F57B1.3      | 0.00 | 0.29 | 0.00 | 0.10 | 0.00 | 0.38 | 0.00 | 0.13 | 1.29 |
| P90901 | ifa-1 F38B2.1                     | 0.35 | 0.36 | 0.33 | 0.34 | 0.52 | 0.36 | 0.45 | 0.44 | 1.29 |
| Q9U2S6 | cyn-13 CELE_Y116A8C.34 Y116A8C.34 | 0.33 | 0.38 | 0.41 | 0.37 | 0.42 | 0.44 | 0.59 | 0.48 | 1.29 |
| Q23098 | nuo-6 CELE_W01A8.4 W01A8.4        | 0.26 | 0.27 | 0.48 | 0.34 | 0.47 | 0.43 | 0.41 | 0.44 | 1.29 |
| Q03565 | baf-1 B0464.7                     | 0.32 | 0.34 | 0.32 | 0.32 | 0.44 | 0.42 | 0.40 | 0.42 | 1.29 |
| O61793 | CELE_R12E2.13 R12E2.13            | 0.39 | 0.00 | 0.29 | 0.23 | 0.39 | 0.00 | 0.49 | 0.30 | 1.29 |
| O01615 | T19H12.2                          | 0.49 | 0.26 | 0.33 | 0.36 | 0.30 | 0.45 | 0.67 | 0.47 | 1.30 |
| O01532 | asp-5 CELE_F21F8.3 F21F8.3        | 0.31 | 0.34 | 0.33 | 0.32 | 0.42 | 0.44 | 0.40 | 0.42 | 1.30 |
| Q09EE7 | nsf-1 CELE_H15N14.2 H15N14.2      | 0.34 | 0.33 | 0.36 | 0.34 | 0.44 | 0.46 | 0.43 | 0.44 | 1.30 |
| Q27245 | lap-2 W07G4.4                     | 0.34 | 0.31 | 0.34 | 0.33 | 0.44 | 0.44 | 0.41 | 0.43 | 1.30 |
| Q9TZL8 | pfk-1 Y71H10A.1                   | 0.00 | 0.36 | 0.34 | 0.23 | 0.00 | 0.44 | 0.47 | 0.30 | 1.30 |
| H2L2E8 | tba-1 CELE_F26E4.8 F26E4.8        | 0.31 | 0.00 | 0.00 | 0.10 | 0.40 | 0.00 | 0.00 | 0.13 | 1.30 |
| Q9TZS5 | cct-7 CELE_T10B5.5 T10B5.5        | 0.62 | 0.27 | 0.26 | 0.38 | 0.57 | 0.47 | 0.46 | 0.50 | 1.30 |
| Q19832 | msp-3 F26G1.7                     | 0.35 | 0.00 | 0.34 | 0.23 | 0.44 | 0.00 | 0.46 | 0.30 | 1.30 |
| Q9N384 | lec-6 CELE_Y55B1AR.1 Y55B1AR.1    | 0.32 | 0.38 | 0.36 | 0.35 | 0.46 | 0.46 | 0.46 | 0.46 | 1.30 |
| O17641 | col-178 C34F6.2 CELE_C34F6.2      | 0.00 | 0.29 | 0.30 | 0.20 | 0.00 | 0.45 | 0.31 | 0.25 | 1.30 |
| G4SI07 | gei-15 CELE_M03A8.4 M03A8.4       | 0.00 | 0.38 | 0.00 | 0.13 | 0.00 | 0.50 | 0.00 | 0.17 | 1.30 |
| Q20964 | lys-4 CELE_F58B3.1 F58B3.1        | 0.31 | 0.33 | 0.29 | 0.31 | 0.42 | 0.39 | 0.41 | 0.41 | 1.30 |
| Q3LFN1 | lbp-9 CELE_Y40B10A.1 Y40B10A.1    | 0.31 | 0.32 | 0.31 | 0.31 | 0.41 | 0.40 | 0.43 | 0.41 | 1.31 |
| Q21230 | K04G2.1                           | 0.36 | 0.32 | 0.30 | 0.33 | 0.41 | 0.43 | 0.44 | 0.43 | 1.31 |
| P30642 | eif-3.D R08D7.3                   | 0.30 | 0.39 | 0.29 | 0.33 | 0.43 | 0.42 | 0.42 | 0.43 | 1.31 |
| O44727 | cpn-4 CELE_F49D11.8 F49D11.8      | 0.33 | 0.35 | 0.32 | 0.33 | 0.43 | 0.45 | 0.44 | 0.44 | 1.31 |

|        |                                  |      |      |      |      |      |      |      |      |      |
|--------|----------------------------------|------|------|------|------|------|------|------|------|------|
| Q17512 | B0491.5 CELE_B0491.5             | 0.40 | 0.29 | 0.49 | 0.39 | 0.51 | 0.47 | 0.57 | 0.51 | 1.31 |
| Q95XR0 | CELE_Y39G10AR.8 Y39G10AR.8       | 0.37 | 0.28 | 0.35 | 0.33 | 0.49 | 0.45 | 0.38 | 0.44 | 1.31 |
| Q44512 | isp-1 CELE_F42G8.12 F42G8.12     | 0.32 | 0.33 | 0.34 | 0.33 | 0.43 | 0.43 | 0.45 | 0.44 | 1.31 |
| Q9U2Q8 | fkf-2 CELE_Y18D10A.19 Y18D10A.19 | 0.33 | 0.32 | 0.32 | 0.32 | 0.42 | 0.41 | 0.43 | 0.42 | 1.32 |
| P34697 | sod-1 C15F1.7                    | 0.33 | 0.32 | 0.32 | 0.32 | 0.43 | 0.43 | 0.42 | 0.42 | 1.32 |
| G5EDD4 | tba-4 CELE_F44F4.11 F44F4.11     | 0.33 | 0.32 | 0.28 | 0.31 | 0.41 | 0.42 | 0.40 | 0.41 | 1.32 |
| P19974 | cyc-2.1 E04A4.7                  | 0.33 | 0.34 | 0.34 | 0.34 | 0.45 | 0.44 | 0.44 | 0.44 | 1.32 |
| Q9BL34 | CELE_Y71H2AM.5 Y71H2AM.5         | 0.32 | 0.31 | 0.33 | 0.32 | 0.42 | 0.42 | 0.42 | 0.42 | 1.32 |
| Q18231 | rps-30 C26F1.4 CELE_C26F1.4      | 0.33 | 0.32 | 0.32 | 0.32 | 0.39 | 0.39 | 0.49 | 0.42 | 1.32 |
| G5EBH7 | calu-1 CELE_M03F4.7 M03F4.7      | 0.37 | 0.32 | 0.38 | 0.35 | 0.43 | 0.53 | 0.44 | 0.47 | 1.32 |
| Q21930 | rpl-28 R11D1.8                   | 0.33 | 0.32 | 0.33 | 0.33 | 0.43 | 0.43 | 0.44 | 0.43 | 1.32 |
| Q20363 | sip-1 F43D9.4                    | 0.32 | 0.34 | 0.32 | 0.33 | 0.43 | 0.44 | 0.43 | 0.43 | 1.32 |
| Q95XT5 | trap-1 CELE_Y71F9AM.6 Y71F9AM.6  | 0.32 | 0.33 | 0.32 | 0.32 | 0.42 | 0.43 | 0.42 | 0.43 | 1.32 |
| Q9XW16 | eif-3.B Y54E2A.11                | 0.32 | 0.34 | 0.32 | 0.33 | 0.42 | 0.41 | 0.46 | 0.43 | 1.32 |
| Q18211 | ran-3 C26D10.1                   | 0.41 | 0.33 | 0.28 | 0.34 | 0.46 | 0.41 | 0.48 | 0.45 | 1.32 |
| P90983 | rps-29 B0412.4 CELE_B0412.4      | 0.34 | 0.27 | 0.27 | 0.29 | 0.39 | 0.39 | 0.39 | 0.39 | 1.33 |
| Q10020 | T28D9.1                          | 0.31 | 0.36 | 0.31 | 0.33 | 0.39 | 0.46 | 0.46 | 0.44 | 1.33 |
| Q9U329 | CELE_W09C5.8 W09C5.8             | 0.33 | 0.33 | 0.34 | 0.33 | 0.45 | 0.44 | 0.42 | 0.44 | 1.33 |
| P34346 | let-754 C29E4.8                  | 0.32 | 0.32 | 0.33 | 0.32 | 0.44 | 0.42 | 0.42 | 0.43 | 1.33 |
| P52011 | cyn-3 cyp-3 Y75B12B.5            | 0.30 | 0.32 | 0.32 | 0.32 | 0.42 | 0.43 | 0.42 | 0.42 | 1.33 |
| P02567 | myo-1 R06C7.10                   | 0.33 | 0.33 | 0.34 | 0.33 | 0.45 | 0.44 | 0.44 | 0.44 | 1.33 |
| Q9U1Z4 | CELE_Y60A3A.9 Y60A3A.9           | 0.41 | 0.00 | 0.23 | 0.22 | 0.38 | 0.00 | 0.48 | 0.29 | 1.33 |
| O45011 | CELE_W10C8.5 W10C8.5             | 0.31 | 0.33 | 0.31 | 0.32 | 0.41 | 0.42 | 0.45 | 0.42 | 1.33 |
| Q09517 | let-767 dhs-10 C56G2.6           | 0.36 | 0.32 | 0.31 | 0.33 | 0.44 | 0.45 | 0.43 | 0.44 | 1.33 |
| Q9N4J2 | vit-3 F59D8.1                    | 0.32 | 0.28 | 0.30 | 0.30 | 0.40 | 0.41 | 0.39 | 0.40 | 1.33 |
| Q9GY11 | CELE_F29B9.11 F29B9.11           | 0.52 | 0.26 | 0.27 | 0.35 | 0.47 | 0.49 | 0.45 | 0.47 | 1.34 |
| Q21531 | ifg-1 CELE_M110.4 M110.4         | 0.37 | 0.34 | 0.31 | 0.34 | 0.43 | 0.51 | 0.42 | 0.45 | 1.34 |
| Q9GZH4 | ribo-1 T22D1.4                   | 0.36 | 0.31 | 0.30 | 0.32 | 0.43 | 0.42 | 0.45 | 0.43 | 1.34 |
| O01816 | cytb-5.2 CELE_W02D3.1 W02D3.1    | 0.30 | 0.28 | 0.31 | 0.30 | 0.36 | 0.42 | 0.42 | 0.40 | 1.34 |
| P24894 | ctc-2 coII cox-2 MTCE.31         | 0.29 | 0.27 | 0.34 | 0.30 | 0.40 | 0.41 | 0.39 | 0.40 | 1.34 |
| Q18090 | tomm-40 C18E9.6                  | 0.30 | 0.31 | 0.34 | 0.32 | 0.44 | 0.41 | 0.43 | 0.43 | 1.34 |
| Q2V4S2 | gdi-1 CELE_Y57G11C.10 Y57G11C.10 | 0.32 | 0.44 | 0.32 | 0.36 | 0.46 | 0.53 | 0.46 | 0.48 | 1.35 |
| Q86NH9 | ttr-41 CELE_F10G7.11 F10G7.11    | 0.32 | 0.31 | 0.29 | 0.30 | 0.41 | 0.40 | 0.42 | 0.41 | 1.35 |
| O61907 | lin-40 CELE_T27C4.4 T27C4.4      | 0.32 | 0.00 | 0.00 | 0.11 | 0.44 | 0.00 | 0.00 | 0.15 | 1.35 |
| Q9U307 | gln-3 CELE_Y105C5B.28 Y105C5B.28 | 0.37 | 0.30 | 0.31 | 0.33 | 0.45 | 0.43 | 0.44 | 0.44 | 1.35 |
| O02642 | sucl-2 CELE_F23H11.3 F23H11.3    | 0.33 | 0.31 | 0.30 | 0.31 | 0.40 | 0.44 | 0.42 | 0.42 | 1.35 |
| P54889 | alh-13 T22H6.2                   | 0.00 | 0.00 | 0.32 | 0.11 | 0.00 | 0.00 | 0.44 | 0.15 | 1.35 |
| Q09450 | C05C10.3                         | 0.29 | 0.31 | 0.33 | 0.31 | 0.42 | 0.45 | 0.40 | 0.42 | 1.35 |
| P54811 | cdc-48.1 C06A1.1                 | 0.00 | 0.32 | 0.30 | 0.21 | 0.00 | 0.42 | 0.42 | 0.28 | 1.35 |
| Q23237 | pbs-3 Y38A8.2                    | 0.34 | 0.36 | 0.34 | 0.35 | 0.42 | 0.52 | 0.47 | 0.47 | 1.35 |
| Q19286 | ifb-2 F10C1.7                    | 0.32 | 0.31 | 0.33 | 0.32 | 0.44 | 0.44 | 0.43 | 0.44 | 1.36 |
| P50093 | phb-2 T24H7.1                    | 0.30 | 0.30 | 0.32 | 0.31 | 0.42 | 0.42 | 0.39 | 0.41 | 1.36 |
| Q21770 | wago-1 R06C7.1                   | 0.31 | 0.00 | 0.00 | 0.10 | 0.42 | 0.00 | 0.00 | 0.14 | 1.36 |
| Q20655 | ftt-2 F52D10.3                   | 0.32 | 0.33 | 0.31 | 0.32 | 0.44 | 0.44 | 0.42 | 0.43 | 1.36 |
| O61199 | ogdh-1 T22B11.5                  | 0.32 | 0.31 | 0.33 | 0.32 | 0.43 | 0.44 | 0.43 | 0.43 | 1.36 |
| Q20135 | col-81 CELE_F38A3.1 F38A3.1      | 0.00 | 0.23 | 0.24 | 0.15 | 0.00 | 0.22 | 0.41 | 0.21 | 1.36 |
| P48053 | C05D11.1                         | 0.00 | 0.32 | 0.00 | 0.11 | 0.00 | 0.44 | 0.00 | 0.15 | 1.36 |
| Q95008 | pas-5 F25H2.9                    | 0.34 | 0.29 | 0.32 | 0.31 | 0.42 | 0.43 | 0.43 | 0.43 | 1.36 |
| Q965Q1 | CELE_Y22D7AL.10 Y22D7AL.10       | 0.32 | 0.30 | 0.33 | 0.32 | 0.42 | 0.43 | 0.44 | 0.43 | 1.36 |
| Q02335 | ZK370.8                          | 0.34 | 0.00 | 0.00 | 0.11 | 0.46 | 0.00 | 0.00 | 0.15 | 1.36 |

|        |                                   |      |      |      |      |      |      |      |      |      |
|--------|-----------------------------------|------|------|------|------|------|------|------|------|------|
| Q18823 | lam-2 C54D1.5                     | 0.33 | 0.00 | 0.39 | 0.24 | 0.48 | 0.00 | 0.49 | 0.32 | 1.36 |
| O44549 | acdh-3 CELE_K06A5.6 K06A5.6       | 0.33 | 0.31 | 0.29 | 0.31 | 0.39 | 0.42 | 0.45 | 0.42 | 1.36 |
| O44400 | F37C4.5                           | 0.33 | 0.31 | 0.32 | 0.32 | 0.41 | 0.44 | 0.45 | 0.44 | 1.36 |
| O18239 | sec-61 CELE_Y57G11C.15 Y57G11C.15 | 0.30 | 0.34 | 0.32 | 0.32 | 0.38 | 0.49 | 0.44 | 0.44 | 1.36 |
| G5EDP2 | daf-22 Y57A10C.6                  | 0.30 | 0.47 | 0.29 | 0.35 | 0.44 | 0.50 | 0.50 | 0.48 | 1.36 |
| P12845 | myo-2 T18D3.4                     | 0.32 | 0.32 | 0.32 | 0.32 | 0.44 | 0.44 | 0.44 | 0.44 | 1.36 |
| O45713 | CELE_R09B3.3 R09B3.3              | 0.32 | 0.29 | 0.32 | 0.31 | 0.51 | 0.39 | 0.38 | 0.43 | 1.37 |
| Q19328 | tsn-1 CELE_F10G7.2 F10G7.2        | 0.30 | 0.33 | 0.33 | 0.32 | 0.45 | 0.44 | 0.43 | 0.44 | 1.37 |
| O45734 | cpl-1 CELE_T03E6.7 T03E6.7        | 0.32 | 0.32 | 0.33 | 0.32 | 0.44 | 0.41 | 0.46 | 0.44 | 1.37 |
| Q23158 | atn-1 CELE_W04D2.1 W04D2.1        | 0.32 | 0.32 | 0.28 | 0.31 | 0.39 | 0.40 | 0.47 | 0.42 | 1.37 |
| Q17832 | vgln-1 C08H9.2 CELE_C08H9.2       | 0.30 | 0.32 | 0.33 | 0.32 | 0.44 | 0.44 | 0.43 | 0.44 | 1.37 |
| Q9TYW1 | vha-19 CELE_Y55H10A.1 Y55H10A.1   | 0.31 | 0.32 | 0.30 | 0.31 | 0.44 | 0.40 | 0.43 | 0.43 | 1.37 |
| Q95XS2 | CELE_Y38F2AR.9 Y38F2AR.9          | 0.43 | 0.00 | 0.42 | 0.28 | 0.57 | 0.00 | 0.58 | 0.39 | 1.37 |
| Q94230 | plp-1 CELE_F45E4.2 F45E4.2        | 0.31 | 0.33 | 0.31 | 0.32 | 0.44 | 0.43 | 0.44 | 0.43 | 1.37 |
| G5EDD1 | ucr-2.1 CELE_VW06B3R.1 VW06B3R.1  | 0.30 | 0.38 | 0.30 | 0.33 | 0.44 | 0.46 | 0.45 | 0.45 | 1.37 |
| P91427 | pgk-1 T03F1.3                     | 0.31 | 0.32 | 0.31 | 0.31 | 0.43 | 0.41 | 0.44 | 0.43 | 1.37 |
| G5EGK8 | let-92 F38H4.9                    | 0.00 | 0.00 | 0.30 | 0.10 | 0.00 | 0.00 | 0.41 | 0.14 | 1.37 |
| Q21351 | gtbp-1 CELE_K08F4.2 K08F4.2       | 0.31 | 0.30 | 0.30 | 0.30 | 0.42 | 0.40 | 0.42 | 0.42 | 1.37 |
| Q19202 | apy-1 F08C6.6                     | 0.00 | 0.00 | 0.31 | 0.10 | 0.00 | 0.00 | 0.43 | 0.14 | 1.38 |
| O17921 | tbb-1 CELE_K01G5.7 K01G5.7        | 0.33 | 0.32 | 0.30 | 0.32 | 0.42 | 0.44 | 0.45 | 0.43 | 1.38 |
| O44738 | CELE_F57B10.5 F57B10.5            | 0.00 | 0.27 | 0.41 | 0.23 | 0.00 | 0.34 | 0.59 | 0.31 | 1.38 |
| Q20779 | tag-174 F54D8.2                   | 0.30 | 0.32 | 0.32 | 0.31 | 0.45 | 0.42 | 0.42 | 0.43 | 1.38 |
| Q17574 | tag-165 C01G6.6                   | 0.32 | 0.31 | 0.32 | 0.32 | 0.44 | 0.44 | 0.43 | 0.43 | 1.38 |
| G5ECA7 | CELE_T02D1.8 T02D1.8              | 0.00 | 0.00 | 0.32 | 0.11 | 0.00 | 0.00 | 0.44 | 0.15 | 1.38 |
| Q20970 | mrs-1 F58B3.5                     | 0.30 | 0.30 | 0.34 | 0.31 | 0.44 | 0.43 | 0.42 | 0.43 | 1.38 |
| Q19126 | asb-2 CELE_F02E8.1 F02E8.1        | 0.31 | 0.30 | 0.32 | 0.31 | 0.43 | 0.44 | 0.44 | 0.43 | 1.38 |
| B7WNA0 | pyk-1 CELE_F25H5.3 F25H5.3        | 0.35 | 0.33 | 0.31 | 0.33 | 0.43 | 0.46 | 0.47 | 0.45 | 1.38 |
| Q20684 | lec-2 CELE_F52H3.7 F52H3.7        | 0.32 | 0.31 | 0.32 | 0.32 | 0.44 | 0.46 | 0.41 | 0.44 | 1.38 |
| Q23655 | ntl-1 ZK892.2                     | 0.30 | 0.00 | 0.28 | 0.20 | 0.36 | 0.00 | 0.45 | 0.27 | 1.38 |
| P55954 | cco-2 Y37D8A.14                   | 0.34 | 0.32 | 0.32 | 0.32 | 0.45 | 0.46 | 0.43 | 0.45 | 1.39 |
| Q9TYK1 | Y66H1A.4                          | 0.31 | 0.34 | 0.34 | 0.33 | 0.46 | 0.51 | 0.41 | 0.46 | 1.39 |
| O62102 | pbs-2 C47B2.4 CELE_C47B2.4        | 0.36 | 0.42 | 0.00 | 0.26 | 0.47 | 0.61 | 0.00 | 0.36 | 1.39 |
| G5EGK1 | tln-1 CELE_Y71G12B.11 Y71G12B.11  | 0.28 | 0.00 | 0.00 | 0.09 | 0.39 | 0.00 | 0.00 | 0.13 | 1.39 |
| Q9UAQ6 | rab-1 C39F7.4 CELE_C39F7.4        | 0.33 | 0.30 | 0.30 | 0.31 | 0.41 | 0.43 | 0.45 | 0.43 | 1.39 |
| Q9BKU4 | phb-1 Y37E3.9                     | 0.33 | 0.29 | 0.30 | 0.30 | 0.42 | 0.43 | 0.42 | 0.42 | 1.39 |
| Q9U2D6 | cnp-2 Y46G5A.10                   | 0.00 | 0.00 | 0.30 | 0.10 | 0.00 | 0.00 | 0.42 | 0.14 | 1.39 |
| Q22494 | vha-15 T14F9.1                    | 0.32 | 0.34 | 0.30 | 0.32 | 0.46 | 0.45 | 0.44 | 0.45 | 1.39 |
| Q9NEN6 | rps-6 Y71A12B.1                   | 0.31 | 0.32 | 0.34 | 0.32 | 0.46 | 0.45 | 0.44 | 0.45 | 1.39 |
| Q95Q60 | fkf-5 C50F2.6 CELE_C50F2.6        | 0.47 | 0.25 | 0.36 | 0.36 | 0.46 | 0.49 | 0.54 | 0.50 | 1.39 |
| Q86S57 | alh-4 CELE_T05H4.13 T05H4.13      | 0.29 | 0.00 | 0.32 | 0.21 | 0.47 | 0.00 | 0.39 | 0.29 | 1.39 |
| Q9XX57 | dct-16 CELE_Y38H6C.1 Y38H6C.1     | 0.31 | 0.31 | 0.31 | 0.31 | 0.43 | 0.43 | 0.44 | 0.43 | 1.39 |
| Q8WQA8 | rps-20 CELE_Y105E8A.16 Y105E8A.16 | 0.31 | 0.31 | 0.32 | 0.31 | 0.44 | 0.44 | 0.44 | 0.44 | 1.39 |
| O16249 | CELE_F44E7.4 F44E7.4              | 0.32 | 0.31 | 0.35 | 0.33 | 0.45 | 0.45 | 0.47 | 0.46 | 1.39 |
| Q18212 | hel-1 C26D10.2                    | 0.29 | 0.32 | 0.35 | 0.32 | 0.46 | 0.45 | 0.43 | 0.45 | 1.39 |
| Q94246 | gfi-1 CELE_F57F4.3 F57F4.3        | 0.30 | 0.30 | 0.33 | 0.31 | 0.44 | 0.43 | 0.42 | 0.43 | 1.40 |
| G5EBJ7 | fbp-1 fbp CELE_K07A3.1 K07A3.1    | 0.34 | 0.30 | 0.30 | 0.31 | 0.42 | 0.45 | 0.44 | 0.44 | 1.40 |
| Q9N3B0 | Y54G2A.23                         | 0.29 | 0.32 | 0.31 | 0.31 | 0.40 | 0.43 | 0.45 | 0.43 | 1.40 |
| Q20676 | pccb-1 CELE_F52E4.1 F52E4.1       | 0.33 | 0.32 | 0.31 | 0.32 | 0.45 | 0.44 | 0.44 | 0.44 | 1.40 |
| Q9XTI0 | B0250.5                           | 0.29 | 0.29 | 0.30 | 0.29 | 0.41 | 0.41 | 0.42 | 0.41 | 1.40 |
| Q95X44 | vha-8 C17H12.14 CELE_C17H12.14    | 0.31 | 0.32 | 0.32 | 0.32 | 0.44 | 0.44 | 0.44 | 0.44 | 1.40 |

|        |                                                                                                                                                                                                                                                                       |      |      |      |      |      |      |      |      |      |
|--------|-----------------------------------------------------------------------------------------------------------------------------------------------------------------------------------------------------------------------------------------------------------------------|------|------|------|------|------|------|------|------|------|
| Q18577 | C42D4.1 CELE_C42D4.1                                                                                                                                                                                                                                                  | 0.33 | 0.00 | 0.31 | 0.21 | 0.43 | 0.00 | 0.46 | 0.30 | 1.40 |
| O76367 | CELE_F29C4.2 F29C4.2                                                                                                                                                                                                                                                  | 0.29 | 0.26 | 0.00 | 0.18 | 0.38 | 0.38 | 0.00 | 0.25 | 1.40 |
| G5EE96 | slc-25a10 slc-25A10 CELE_K11G12.5 K11G12.5                                                                                                                                                                                                                            | 0.00 | 0.00 | 0.32 | 0.11 | 0.00 | 0.00 | 0.45 | 0.15 | 1.40 |
| Q4W5P0 | sqd-1 CELE_Y73B6BL.6 Y73B6BL.6                                                                                                                                                                                                                                        | 0.33 | 0.31 | 0.33 | 0.33 | 0.42 | 0.54 | 0.42 | 0.46 | 1.40 |
| Q21746 | sgt-1 CELE_R05F9.10 R05F9.10                                                                                                                                                                                                                                          | 0.32 | 0.31 | 0.32 | 0.32 | 0.43 | 0.46 | 0.45 | 0.45 | 1.40 |
| Q22633 | hpd-1 T21C12.2                                                                                                                                                                                                                                                        | 0.30 | 0.37 | 0.31 | 0.32 | 0.47 | 0.43 | 0.46 | 0.45 | 1.40 |
| Q9N5U1 | CELE_T22F3.3 T22F3.3                                                                                                                                                                                                                                                  | 0.31 | 0.33 | 0.30 | 0.31 | 0.44 | 0.45 | 0.42 | 0.44 | 1.40 |
| Q8MNV8 | C14B9.10 CELE_C14B9.10                                                                                                                                                                                                                                                | 0.00 | 0.27 | 0.32 | 0.20 | 0.00 | 0.44 | 0.40 | 0.28 | 1.40 |
| Q7Z1Q3 | alh-12 CELE_Y69F12A.2 Y69F12A.2                                                                                                                                                                                                                                       | 0.24 | 0.32 | 0.00 | 0.19 | 0.37 | 0.42 | 0.00 | 0.26 | 1.40 |
| H2KZF5 | pmt-1 CELE_ZK622.3 ZK622.3                                                                                                                                                                                                                                            | 0.33 | 0.35 | 0.30 | 0.33 | 0.44 | 0.46 | 0.47 | 0.46 | 1.40 |
| Q10129 | mrps-16 F56D1.3                                                                                                                                                                                                                                                       | 0.00 | 0.30 | 0.00 | 0.10 | 0.00 | 0.42 | 0.00 | 0.14 | 1.40 |
| Q95XI9 | CELE_Y69A2AR.18 Y69A2AR.18                                                                                                                                                                                                                                            | 0.32 | 0.31 | 0.31 | 0.31 | 0.43 | 0.44 | 0.44 | 0.44 | 1.40 |
| O01802 | rpl-7 F53G12.10                                                                                                                                                                                                                                                       | 0.31 | 0.32 | 0.34 | 0.32 | 0.45 | 0.45 | 0.44 | 0.45 | 1.40 |
| Q20224 | lbp-2 F40F4.2                                                                                                                                                                                                                                                         | 0.32 | 0.36 | 0.28 | 0.32 | 0.43 | 0.45 | 0.47 | 0.45 | 1.40 |
| B3WFT8 | C14F11.4 CELE_C14F11.4                                                                                                                                                                                                                                                | 0.00 | 0.00 | 0.30 | 0.10 | 0.00 | 0.00 | 0.42 | 0.14 | 1.41 |
| P11141 | hsp-6 hsp70f C37H5.8                                                                                                                                                                                                                                                  | 0.30 | 0.32 | 0.30 | 0.31 | 0.43 | 0.44 | 0.42 | 0.43 | 1.41 |
| O62213 | cey-1 CELE_F33A8.3 F33A8.3                                                                                                                                                                                                                                            | 0.33 | 0.33 | 0.33 | 0.33 | 0.45 | 0.46 | 0.47 | 0.46 | 1.41 |
| Q9XTT9 | rpt-6 CELE_Y49E10.1 Y49E10.1                                                                                                                                                                                                                                          | 0.42 | 0.35 | 0.30 | 0.35 | 0.49 | 0.49 | 0.52 | 0.50 | 1.41 |
| G5EEK8 | sca-1 mca-4 CELE_K11D9.2 K11D9.2                                                                                                                                                                                                                                      | 0.31 | 0.31 | 0.31 | 0.31 | 0.44 | 0.44 | 0.43 | 0.44 | 1.41 |
| Q8MXS8 | CELE_Y47G6A.22 Y47G6A.22                                                                                                                                                                                                                                              | 0.00 | 0.32 | 0.33 | 0.22 | 0.00 | 0.47 | 0.44 | 0.30 | 1.41 |
| O18650 | rps-19 T05F1.3                                                                                                                                                                                                                                                        | 0.30 | 0.33 | 0.31 | 0.31 | 0.43 | 0.46 | 0.44 | 0.44 | 1.41 |
| Q9XXK1 | H28O16.1                                                                                                                                                                                                                                                              | 0.30 | 0.32 | 0.31 | 0.31 | 0.44 | 0.43 | 0.45 | 0.44 | 1.41 |
| P34328 | hsp-12.2 hsp12-2 C14B9.1                                                                                                                                                                                                                                              | 0.33 | 0.29 | 0.31 | 0.31 | 0.45 | 0.43 | 0.43 | 0.44 | 1.41 |
| G5EBP5 | CELE_ZC247.1 ZC247.1                                                                                                                                                                                                                                                  | 0.30 | 0.31 | 0.32 | 0.31 | 0.44 | 0.43 | 0.43 | 0.43 | 1.41 |
| O01692 | rps-17 T08B2.10                                                                                                                                                                                                                                                       | 0.31 | 0.32 | 0.31 | 0.31 | 0.44 | 0.44 | 0.45 | 0.44 | 1.41 |
| Q7K707 | gpi-1 CELE_Y87G2A.8 Y87G2A.8                                                                                                                                                                                                                                          | 0.29 | 0.42 | 0.34 | 0.35 | 0.52 | 0.51 | 0.46 | 0.50 | 1.41 |
| P54412 | eef-1G F17C11.9                                                                                                                                                                                                                                                       | 0.32 | 0.32 | 0.31 | 0.32 | 0.45 | 0.45 | 0.45 | 0.45 | 1.41 |
| G5EFG4 | abcf-2 CELE_T27E9.7 T27E9.7                                                                                                                                                                                                                                           | 0.30 | 0.32 | 0.32 | 0.32 | 0.42 | 0.48 | 0.44 | 0.45 | 1.41 |
| P90762 | rmd-2 C27H6.4 CELE_C27H6.4                                                                                                                                                                                                                                            | 0.31 | 0.31 | 0.30 | 0.31 | 0.43 | 0.43 | 0.44 | 0.43 | 1.42 |
| P10299 | gst-1 R107.7                                                                                                                                                                                                                                                          | 0.33 | 0.31 | 0.37 | 0.34 | 0.48 | 0.51 | 0.44 | 0.48 | 1.42 |
| H2KZ19 | ampd-1 C34F11.3 CELE_C34F11.3                                                                                                                                                                                                                                         | 0.32 | 0.00 | 0.00 | 0.11 | 0.46 | 0.00 | 0.00 | 0.15 | 1.42 |
| P90735 | eat-6 B0365.3 CELE_B0365.3                                                                                                                                                                                                                                            | 0.31 | 0.32 | 0.30 | 0.31 | 0.44 | 0.44 | 0.44 | 0.44 | 1.42 |
| O16517 | atp-4 CELE_T05H4.12 T05H4.12                                                                                                                                                                                                                                          | 0.30 | 0.30 | 0.31 | 0.30 | 0.43 | 0.43 | 0.43 | 0.43 | 1.42 |
| Q17763 | atp-5 C06H2.1 CELE_C06H2.1                                                                                                                                                                                                                                            | 0.31 | 0.30 | 0.30 | 0.30 | 0.42 | 0.44 | 0.43 | 0.43 | 1.42 |
| Q10576 | dpy-18 phy-1 Y47D3B.10                                                                                                                                                                                                                                                | 0.41 | 0.28 | 0.29 | 0.33 | 0.38 | 0.53 | 0.49 | 0.47 | 1.42 |
| Q09975 | lys-8 C17G10.5 CELE_C17G10.5                                                                                                                                                                                                                                          | 0.30 | 0.00 | 0.00 | 0.10 | 0.43 | 0.00 | 0.00 | 0.14 | 1.42 |
| P09588 | his-3 T10C6.12; his-7 F45F2.4; his-12 ZK131.6; his-16 ZK131.10; his-19 K06C4.11; his-21 K06C4.3; his-30 F35H10.1; his-33 F17E9.13; his-43 F08G2.2; his-47 B0035.7; his-51 F07B7.10; his-53 F07B7.3; his-57 F54E12.5; his-61 F55G1.10; his-65 H02I12.7; his-68 T23D8.6 | 0.33 | 0.32 | 0.35 | 0.34 | 0.56 | 0.44 | 0.43 | 0.48 | 1.42 |
| P28548 | kin-10 kin-5 T01G9.6                                                                                                                                                                                                                                                  | 0.33 | 0.00 | 0.00 | 0.11 | 0.47 | 0.00 | 0.00 | 0.16 | 1.42 |
| Q18678 | srs-2 C47E12.1                                                                                                                                                                                                                                                        | 0.30 | 0.30 | 0.32 | 0.31 | 0.44 | 0.42 | 0.45 | 0.43 | 1.42 |
| Q9NES7 | CELE_Y39B6A.1 Y39B6A.1                                                                                                                                                                                                                                                | 0.24 | 0.27 | 0.30 | 0.27 | 0.36 | 0.41 | 0.39 | 0.39 | 1.42 |
| Q21481 | dhs-28 CELE_M03A8.1 M03A8.1                                                                                                                                                                                                                                           | 0.32 | 0.30 | 0.31 | 0.31 | 0.44 | 0.45 | 0.44 | 0.44 | 1.42 |
| O45552 | acaa-2 CELE_F53A2.7 F53A2.7                                                                                                                                                                                                                                           | 0.32 | 0.29 | 0.32 | 0.31 | 0.44 | 0.45 | 0.43 | 0.44 | 1.42 |
| P53014 | mhc-3 F09F7.2                                                                                                                                                                                                                                                         | 0.31 | 0.31 | 0.31 | 0.31 | 0.44 | 0.44 | 0.44 | 0.44 | 1.42 |
| P50880 | rpl-3 F13B10.2                                                                                                                                                                                                                                                        | 0.31 | 0.30 | 0.32 | 0.31 | 0.45 | 0.44 | 0.43 | 0.44 | 1.43 |
| P34466 | clu-1 F55H2.6                                                                                                                                                                                                                                                         | 0.48 | 0.30 | 0.27 | 0.35 | 0.52 | 0.47 | 0.51 | 0.50 | 1.43 |
| Q20585 | rpn-7 F49C12.8                                                                                                                                                                                                                                                        | 0.34 | 0.28 | 0.00 | 0.21 | 0.41 | 0.47 | 0.00 | 0.29 | 1.43 |
| O16305 | cmd-1 T21H3.3                                                                                                                                                                                                                                                         | 0.30 | 0.33 | 0.31 | 0.31 | 0.44 | 0.46 | 0.44 | 0.44 | 1.43 |
| P34460 | eef-1B.1 F54H12.6                                                                                                                                                                                                                                                     | 0.34 | 0.33 | 0.27 | 0.31 | 0.43 | 0.44 | 0.47 | 0.45 | 1.43 |

|        |                                        |      |      |      |      |      |      |      |      |      |
|--------|----------------------------------------|------|------|------|------|------|------|------|------|------|
| P49196 | rps-12 F54E7.2                         | 0.28 | 0.31 | 0.30 | 0.30 | 0.43 | 0.42 | 0.43 | 0.43 | 1.43 |
| G5EDV3 | cey-4 CELE_Y39A1C.3 Y39A1C.3           | 0.31 | 0.30 | 0.33 | 0.31 | 0.46 | 0.44 | 0.44 | 0.45 | 1.43 |
| P06125 | vit-5 C04F6.1                          | 0.30 | 0.29 | 0.28 | 0.29 | 0.41 | 0.41 | 0.42 | 0.41 | 1.43 |
| Q21525 | CELE_M05D6.6 M05D6.6                   | 0.30 | 0.00 | 0.30 | 0.20 | 0.45 | 0.00 | 0.41 | 0.29 | 1.43 |
| Q23451 | rad-23 CELE_ZK20.3 ZK20.3              | 0.00 | 0.33 | 0.00 | 0.11 | 0.00 | 0.47 | 0.00 | 0.16 | 1.43 |
| Q09533 | rpl-10 F10B5.1                         | 0.31 | 0.33 | 0.31 | 0.32 | 0.45 | 0.46 | 0.45 | 0.45 | 1.43 |
| Q21408 | spc-1 CELE_K10B3.10 K10B3.10           | 0.36 | 0.27 | 0.32 | 0.32 | 0.48 | 0.44 | 0.46 | 0.46 | 1.43 |
| P27639 | inf-1 F57B9.6                          | 0.34 | 0.29 | 0.30 | 0.31 | 0.43 | 0.45 | 0.45 | 0.44 | 1.43 |
| Q21443 | lmn-1 lam-1 DY3.2                      | 0.32 | 0.33 | 0.33 | 0.33 | 0.47 | 0.46 | 0.47 | 0.47 | 1.43 |
| Q9BL15 | CELE_Y48G8AL.5 Y48G8AL.5               | 0.37 | 0.25 | 0.00 | 0.21 | 0.41 | 0.48 | 0.00 | 0.30 | 1.43 |
| Q21750 | aagr-2 CELE_R05F9.12 R05F9.12          | 0.28 | 0.00 | 0.00 | 0.09 | 0.41 | 0.00 | 0.00 | 0.14 | 1.43 |
| P50432 | mel-32 gly-1 C05D11.11                 | 0.31 | 0.30 | 0.32 | 0.31 | 0.44 | 0.45 | 0.45 | 0.45 | 1.43 |
| P17139 | emb-9 clb-2 K04H4.1                    | 0.31 | 0.28 | 0.32 | 0.30 | 0.44 | 0.44 | 0.42 | 0.43 | 1.43 |
| Q22641 | lpd-9 CELE_T21C9.5 T21C9.5             | 0.26 | 0.35 | 0.00 | 0.20 | 0.48 | 0.40 | 0.00 | 0.29 | 1.43 |
| Q03577 | drs-1 B0464.1                          | 0.32 | 0.28 | 0.33 | 0.31 | 0.44 | 0.46 | 0.42 | 0.44 | 1.43 |
| Q22716 | rpl-32 CELE_T24B8.1 T24B8.1            | 0.30 | 0.31 | 0.31 | 0.31 | 0.44 | 0.43 | 0.44 | 0.44 | 1.43 |
| Q9XWP7 | EIF-3.J EIF-3.J CELE_Y40B1B.5 Y40B1B.5 | 0.33 | 0.25 | 0.35 | 0.31 | 0.47 | 0.42 | 0.45 | 0.45 | 1.44 |
| G5ECM6 | tufm-1 CELE_Y71H2AM.23 Y71H2AM.23      | 0.32 | 0.32 | 0.31 | 0.31 | 0.47 | 0.43 | 0.46 | 0.45 | 1.44 |
| A7LPG5 | cisd-1 CELE_W02B12.15 W02B12.15        | 0.28 | 0.34 | 0.29 | 0.30 | 0.44 | 0.43 | 0.43 | 0.43 | 1.44 |
| Q19706 | EIF-3.G F22B5.2                        | 0.36 | 0.00 | 0.53 | 0.30 | 0.39 | 0.60 | 0.29 | 0.43 | 1.44 |
| Q19749 | dlat-1 F23B12.5                        | 0.29 | 0.31 | 0.31 | 0.30 | 0.42 | 0.43 | 0.45 | 0.43 | 1.44 |
| O45815 | act-5 CELE_T25C8.2 T25C8.2             | 0.30 | 0.30 | 0.32 | 0.31 | 0.44 | 0.45 | 0.44 | 0.44 | 1.44 |
| Q9U2H9 | eef-1B.2 Y41E3.10                      | 0.31 | 0.31 | 0.31 | 0.31 | 0.43 | 0.45 | 0.46 | 0.45 | 1.44 |
| Q95YF3 | cgh-1 C07H6.5                          | 0.30 | 0.29 | 0.32 | 0.30 | 0.42 | 0.44 | 0.45 | 0.44 | 1.44 |
| Q09622 | puf-12 ZK945.3                         | 0.00 | 0.41 | 0.00 | 0.14 | 0.00 | 0.59 | 0.00 | 0.20 | 1.44 |
| O01829 | ssp-19 C55C2.2                         | 0.32 | 0.30 | 0.23 | 0.28 | 0.37 | 0.44 | 0.42 | 0.41 | 1.44 |
| Q9NA78 | CELE_Y57A10A.23 Y57A10A.23             | 0.35 | 0.32 | 0.30 | 0.32 | 0.47 | 0.49 | 0.43 | 0.46 | 1.44 |
| G5EEH6 | ivd-1 C02B10.1 CELE_C02B10.1           | 0.31 | 0.26 | 0.29 | 0.29 | 0.42 | 0.40 | 0.43 | 0.42 | 1.44 |
| P53013 | eft-3 F31E3.5; eft-4 R03G5.1           | 0.31 | 0.31 | 0.30 | 0.31 | 0.44 | 0.44 | 0.44 | 0.44 | 1.44 |
| Q9N4J8 | cct-3 F54A3.3                          | 0.32 | 0.31 | 0.31 | 0.31 | 0.46 | 0.44 | 0.45 | 0.45 | 1.44 |
| O61820 | EIF-3.E B0511.10                       | 0.00 | 0.34 | 0.32 | 0.22 | 0.00 | 0.46 | 0.48 | 0.31 | 1.44 |
| Q9U348 | col-93 CELE_W05B2.5 W05B2.5            | 0.30 | 0.31 | 0.34 | 0.32 | 0.46 | 0.45 | 0.46 | 0.46 | 1.44 |
| Q93379 | gsr-1 C46F11.2                         | 0.36 | 0.29 | 0.29 | 0.32 | 0.49 | 0.45 | 0.43 | 0.45 | 1.44 |
| Q21832 | mp-4 RBM8 Y14 CELE_R07E5.14 R07E5.14   | 0.00 | 0.27 | 0.00 | 0.09 | 0.00 | 0.39 | 0.00 | 0.13 | 1.44 |
| Q22288 | trr-15 T07C4.5                         | 0.30 | 0.28 | 0.31 | 0.30 | 0.44 | 0.42 | 0.43 | 0.43 | 1.44 |
| Q27527 | enol-1 T21B10.2                        | 0.31 | 0.31 | 0.31 | 0.31 | 0.45 | 0.45 | 0.44 | 0.44 | 1.44 |
| O45060 | C35B1.5 CELE_C35B1.5                   | 0.29 | 0.33 | 0.37 | 0.33 | 0.47 | 0.50 | 0.46 | 0.48 | 1.44 |
| P36573 | lec-1 W09H1.6                          | 0.31 | 0.30 | 0.29 | 0.30 | 0.43 | 0.43 | 0.44 | 0.43 | 1.45 |
| O44898 | CELE_ZK484.5 ZK484.5                   | 0.30 | 0.28 | 0.29 | 0.29 | 0.42 | 0.41 | 0.43 | 0.42 | 1.45 |
| O61848 | CELE_K03E5.2 K03E5.2                   | 0.00 | 0.26 | 0.30 | 0.19 | 0.00 | 0.40 | 0.41 | 0.27 | 1.45 |
| Q17361 | usp-14 tgt-1 C13B4.2                   | 0.00 | 0.36 | 0.26 | 0.21 | 0.00 | 0.43 | 0.48 | 0.30 | 1.45 |
| P48150 | rps-14 F37C12.9                        | 0.30 | 0.33 | 0.32 | 0.31 | 0.46 | 0.46 | 0.45 | 0.45 | 1.45 |
| Q27888 | ldh-1 F13D12.2                         | 0.27 | 0.33 | 0.32 | 0.31 | 0.41 | 0.37 | 0.55 | 0.44 | 1.45 |
| Q23621 | gdh-1 CELE_ZK829.4 ZK829.4             | 0.30 | 0.29 | 0.30 | 0.30 | 0.43 | 0.44 | 0.43 | 0.43 | 1.45 |
| H9G2T4 | idh-1 CELE_F59B8.2 F59B8.2             | 0.31 | 0.31 | 0.31 | 0.31 | 0.46 | 0.45 | 0.44 | 0.45 | 1.45 |
| Q10454 | F46H5.3                                | 0.32 | 0.29 | 0.31 | 0.30 | 0.44 | 0.44 | 0.44 | 0.44 | 1.45 |
| Q9N5B3 | CELE_W08E12.7 W08E12.7                 | 0.30 | 0.30 | 0.31 | 0.30 | 0.44 | 0.44 | 0.44 | 0.44 | 1.45 |
| P34519 | K11H3.3                                | 0.28 | 0.30 | 0.35 | 0.31 | 0.47 | 0.44 | 0.44 | 0.45 | 1.45 |
| Q7JNG1 | atp-3 CELE_F27C1.7 F27C1.7             | 0.30 | 0.29 | 0.31 | 0.30 | 0.44 | 0.43 | 0.43 | 0.43 | 1.45 |
| P34455 | aco-2 F54H12.1                         | 0.30 | 0.29 | 0.31 | 0.30 | 0.44 | 0.43 | 0.44 | 0.44 | 1.46 |

|         |                                   |      |      |      |      |      |      |      |      |      |
|---------|-----------------------------------|------|------|------|------|------|------|------|------|------|
| P49180  | rpl-33 F10E7.7                    | 0.32 | 0.33 | 0.30 | 0.31 | 0.46 | 0.46 | 0.46 | 0.46 | 1.46 |
| P98080  | ucr-1 F56D2.1                     | 0.30 | 0.30 | 0.31 | 0.30 | 0.45 | 0.44 | 0.43 | 0.44 | 1.46 |
| O61708  | pqn-59 CELE_R119.4 R119.4         | 0.29 | 0.29 | 0.30 | 0.29 | 0.40 | 0.43 | 0.45 | 0.43 | 1.46 |
| Q21824  | prdx-3 R07E5.2                    | 0.33 | 0.28 | 0.32 | 0.31 | 0.44 | 0.45 | 0.45 | 0.45 | 1.46 |
| Q9N5U5  | cdc-73 F35F11.1                   | 0.30 | 0.00 | 0.00 | 0.10 | 0.44 | 0.00 | 0.00 | 0.15 | 1.46 |
| P02566  | unc-54 myo-4 F11C3.3              | 0.31 | 0.30 | 0.31 | 0.31 | 0.44 | 0.45 | 0.44 | 0.45 | 1.46 |
| Q18853  | cyc-1 C54G4.8 CELE_C54G4.8        | 0.30 | 0.29 | 0.32 | 0.30 | 0.44 | 0.44 | 0.45 | 0.44 | 1.46 |
| Q9XXR4  | ttr-24 CELE_Y51A2D.9 Y51A2D.9     | 0.24 | 0.00 | 0.25 | 0.16 | 0.39 | 0.00 | 0.33 | 0.24 | 1.46 |
| G5EGP4  | vha-6 CELE_VW02B12L.1 VW02B12L.1  | 0.00 | 0.00 | 0.41 | 0.14 | 0.00 | 0.00 | 0.59 | 0.20 | 1.46 |
| Q18885  | icd-1 C56C10.8                    | 0.31 | 0.29 | 0.31 | 0.30 | 0.44 | 0.46 | 0.44 | 0.44 | 1.46 |
| O18240  | rps-18 CELE_Y57G11C.16 Y57G11C.16 | 0.31 | 0.30 | 0.31 | 0.31 | 0.44 | 0.44 | 0.46 | 0.45 | 1.46 |
| Q18680  | pyp-1 uba-1 C47E12.4              | 0.29 | 0.31 | 0.29 | 0.29 | 0.43 | 0.43 | 0.44 | 0.43 | 1.46 |
| P37165  | ubl-1 H06I04.4                    | 0.31 | 0.31 | 0.30 | 0.31 | 0.45 | 0.45 | 0.45 | 0.45 | 1.46 |
| Q20772  | F54D5.7                           | 0.00 | 0.29 | 0.29 | 0.19 | 0.00 | 0.41 | 0.43 | 0.28 | 1.46 |
| P49181  | rpl-36 F37C12.4                   | 0.30 | 0.32 | 0.31 | 0.31 | 0.46 | 0.45 | 0.47 | 0.46 | 1.46 |
| O17861  | F37H8.5                           | 0.28 | 0.28 | 0.30 | 0.28 | 0.44 | 0.40 | 0.42 | 0.42 | 1.46 |
| P49029  | mag-1 R09B3.5                     | 0.00 | 0.31 | 0.27 | 0.19 | 0.00 | 0.41 | 0.44 | 0.28 | 1.47 |
| Q9N4M4  | anc-1 ZK973.6                     | 0.31 | 0.31 | 0.31 | 0.31 | 0.46 | 0.45 | 0.45 | 0.45 | 1.47 |
| Q22993  | pmt-2 CELE_F54D11.1 F54D11.1      | 0.30 | 0.32 | 0.31 | 0.31 | 0.46 | 0.45 | 0.45 | 0.45 | 1.47 |
| Q86D21  | tars-1 C47D12.6 CELE_C47D12.6     | 0.31 | 0.29 | 0.28 | 0.30 | 0.42 | 0.43 | 0.46 | 0.44 | 1.47 |
| Q17624  | arrd-25 C04C11.2 CELE_C04C11.2    | 0.34 | 0.00 | 0.30 | 0.21 | 0.48 | 0.00 | 0.46 | 0.31 | 1.47 |
| P0CG71  | ubq-1 ubia F25B5.4                | 0.29 | 0.30 | 0.28 | 0.29 | 0.42 | 0.43 | 0.43 | 0.42 | 1.47 |
| P91423  | CELE_T03F1.11 T03F1.11            | 1.00 | 0.00 | 0.25 | 0.42 | 0.69 | 0.69 | 0.46 | 0.61 | 1.47 |
| P52013  | cyn-5 cyp-5 F31C3.1               | 0.31 | 0.29 | 0.30 | 0.30 | 0.45 | 0.43 | 0.43 | 0.44 | 1.47 |
| Q22347  | acdh-10 T08G2.3                   | 0.41 | 0.29 | 0.28 | 0.33 | 0.56 | 0.44 | 0.44 | 0.48 | 1.47 |
| P91134  | adss-1 C37H5.6                    | 0.34 | 0.32 | 0.31 | 0.32 | 0.45 | 0.55 | 0.43 | 0.48 | 1.47 |
| Q19420  | ttx-7 F13G3.5                     | 0.35 | 0.26 | 0.33 | 0.31 | 0.42 | 0.47 | 0.49 | 0.46 | 1.47 |
| Q19339  | acs-14 CELE_F11A3.1 F11A3.1       | 0.00 | 0.28 | 0.31 | 0.20 | 0.00 | 0.42 | 0.45 | 0.29 | 1.47 |
| Q20647  | rpl-25.2 F52B5.6                  | 0.29 | 0.31 | 0.31 | 0.30 | 0.45 | 0.45 | 0.44 | 0.45 | 1.47 |
| P51404  | rps-13 C16A3.9                    | 0.31 | 0.31 | 0.31 | 0.31 | 0.46 | 0.45 | 0.45 | 0.46 | 1.47 |
| H2L012  | lfi-1 CELE_ZC8.4 ZC8.4            | 0.00 | 0.33 | 0.00 | 0.11 | 0.00 | 0.48 | 0.00 | 0.16 | 1.47 |
| Q9BKU5  | CELE_Y37E3.8 Y37E3.8              | 0.30 | 0.30 | 0.30 | 0.30 | 0.44 | 0.44 | 0.44 | 0.44 | 1.47 |
| P91128  | rpl-13 C32E8.2                    | 0.32 | 0.29 | 0.31 | 0.31 | 0.45 | 0.46 | 0.45 | 0.45 | 1.47 |
| P52015  | cyn-7 cyp-7 Y75B12B.2             | 0.30 | 0.31 | 0.31 | 0.31 | 0.45 | 0.45 | 0.46 | 0.45 | 1.47 |
| Q19087  | dnpp-1 F01F1.9                    | 0.29 | 0.32 | 0.35 | 0.32 | 0.47 | 0.50 | 0.45 | 0.48 | 1.47 |
| P47207  | cct-2 cctb T21B10.7               | 0.32 | 0.30 | 0.32 | 0.31 | 0.45 | 0.48 | 0.45 | 0.46 | 1.47 |
| Q9TY Y0 | CELE_M57.2 M57.2                  | 0.31 | 0.00 | 0.00 | 0.10 | 0.46 | 0.00 | 0.00 | 0.15 | 1.48 |
| Q18943  | CELE_D1054.10 D1054.10            | 0.39 | 0.28 | 0.31 | 0.32 | 0.49 | 0.51 | 0.43 | 0.48 | 1.48 |
| Q966C6  | rpl-7A Y24D9A.4                   | 0.31 | 0.31 | 0.31 | 0.31 | 0.46 | 0.45 | 0.46 | 0.46 | 1.48 |
| G5EGP8  | cpz-1 CELE_F32B5.8 F32B5.8        | 0.32 | 0.29 | 0.32 | 0.31 | 0.44 | 0.46 | 0.47 | 0.46 | 1.48 |
| D0IMZ5  | fln-1 CELE_Y66H1B.2 Y66H1B.2      | 0.33 | 0.30 | 0.29 | 0.31 | 0.44 | 0.45 | 0.47 | 0.45 | 1.48 |
| G5EGL2  | CELE_T28D6.6 T28D6.6              | 0.00 | 0.00 | 0.29 | 0.10 | 0.00 | 0.00 | 0.43 | 0.14 | 1.48 |
| O01541  | aars-2 ars-2 F28H1.3              | 0.31 | 0.31 | 0.31 | 0.31 | 0.46 | 0.47 | 0.45 | 0.46 | 1.48 |
| Q17633  | C04G2.9 CELE_C04G2.9              | 0.29 | 0.00 | 0.26 | 0.18 | 0.40 | 0.00 | 0.42 | 0.27 | 1.48 |
| Q07750  | unc-60 C38C3.5                    | 0.27 | 0.34 | 0.34 | 0.32 | 0.48 | 0.45 | 0.47 | 0.47 | 1.48 |
| O62431  | ers-1 qrs-5 Y41E3.4               | 0.32 | 0.26 | 0.33 | 0.30 | 0.43 | 0.48 | 0.44 | 0.45 | 1.48 |
| Q19278  | hach-1 CELE_F09F7.4 F09F7.4       | 0.31 | 0.32 | 0.31 | 0.31 | 0.46 | 0.47 | 0.47 | 0.47 | 1.48 |
| P91871  | fasn-1 CELE_F32H2.5 F32H2.5       | 0.32 | 0.36 | 0.30 | 0.32 | 0.48 | 0.47 | 0.49 | 0.48 | 1.48 |
| O02108  | cdc-37 W08F4.8                    | 0.30 | 0.00 | 0.00 | 0.10 | 0.45 | 0.00 | 0.00 | 0.15 | 1.48 |
| P34689  | glh-1 T21G5.3                     | 0.31 | 0.32 | 0.30 | 0.31 | 0.45 | 0.46 | 0.47 | 0.46 | 1.48 |



|        |                                |      |      |      |      |      |      |      |      |      |
|--------|--------------------------------|------|------|------|------|------|------|------|------|------|
| P46563 | aldo-2 F01F1.12                | 0.31 | 0.30 | 0.30 | 0.30 | 0.45 | 0.45 | 0.45 | 0.45 | 1.48 |
| P91253 | gst-7 F11G11.2                 | 0.29 | 0.31 | 0.35 | 0.32 | 0.53 | 0.44 | 0.43 | 0.47 | 1.48 |
| O17406 | attf-2 CELE_F09G2.9 F09G2.9    | 0.30 | 0.34 | 0.28 | 0.31 | 0.45 | 0.41 | 0.50 | 0.46 | 1.48 |
| P61866 | rpl-12 JC8.3                   | 0.30 | 0.29 | 0.30 | 0.30 | 0.44 | 0.45 | 0.44 | 0.44 | 1.48 |
| Q27389 | rpl-16 M01F1.2                 | 0.32 | 0.29 | 0.31 | 0.30 | 0.44 | 0.45 | 0.45 | 0.45 | 1.48 |
| G5EBY3 | nmy-2 CELE_F20G4.3 F20G4.3     | 0.00 | 0.00 | 0.25 | 0.08 | 0.00 | 0.00 | 0.38 | 0.13 | 1.48 |
| Q9U3Q0 | mrps-22 C14A4.14 CELE_C14A4.14 | 0.31 | 0.00 | 0.00 | 0.10 | 0.46 | 0.00 | 0.00 | 0.15 | 1.49 |
| Q09544 | F58F12.1                       | 0.30 | 0.29 | 0.30 | 0.30 | 0.44 | 0.44 | 0.44 | 0.44 | 1.49 |
| P52899 | T05H10.6                       | 0.28 | 0.31 | 0.31 | 0.30 | 0.45 | 0.44 | 0.46 | 0.45 | 1.49 |
| G5EGAS | fat-2 W02A2.1                  | 0.26 | 0.30 | 0.31 | 0.29 | 0.47 | 0.40 | 0.43 | 0.43 | 1.49 |
| Q20938 | rpn-6.1 F57B9.10               | 0.32 | 0.30 | 0.22 | 0.28 | 0.45 | 0.46 | 0.35 | 0.42 | 1.49 |
| Q9U2M4 | Y38F1A.6                       | 0.28 | 0.30 | 0.33 | 0.30 | 0.48 | 0.45 | 0.43 | 0.45 | 1.49 |
| Q22866 | lev-11 tmy-1 Y105E8B.1         | 0.31 | 0.30 | 0.31 | 0.30 | 0.45 | 0.45 | 0.45 | 0.45 | 1.49 |
| P10567 | unc-15 F07A5.7                 | 0.29 | 0.29 | 0.30 | 0.30 | 0.44 | 0.44 | 0.43 | 0.44 | 1.49 |
| Q95005 | pas-4 C36B1.4                  | 0.30 | 0.30 | 0.30 | 0.30 | 0.45 | 0.44 | 0.43 | 0.44 | 1.49 |
| Q9NAI5 | CELE_Y39G8B.1 Y39G8B.1         | 0.31 | 0.31 | 0.29 | 0.30 | 0.43 | 0.46 | 0.45 | 0.45 | 1.49 |
| Q19626 | vha-12 F20B6.2                 | 0.30 | 0.29 | 0.31 | 0.30 | 0.46 | 0.44 | 0.45 | 0.45 | 1.49 |
| P52275 | tbb-2 C36E8.5                  | 0.31 | 0.30 | 0.31 | 0.31 | 0.45 | 0.46 | 0.46 | 0.46 | 1.49 |
| P34575 | cts-1 T20G5.2                  | 0.29 | 0.29 | 0.29 | 0.29 | 0.44 | 0.41 | 0.45 | 0.43 | 1.49 |
| Q19057 | acdh-12 CELE_E04F6.5 E04F6.5   | 0.29 | 0.40 | 0.33 | 0.34 | 0.55 | 0.45 | 0.50 | 0.50 | 1.49 |
| Q11176 | unc-78 C04F6.4                 | 0.32 | 0.30 | 0.30 | 0.31 | 0.44 | 0.45 | 0.48 | 0.46 | 1.49 |
| Q18864 | sft-4 surf-4 C54H2.5           | 0.00 | 0.40 | 0.00 | 0.13 | 0.00 | 0.60 | 0.00 | 0.20 | 1.49 |
| P20163 | hsp-4 hsp70d F43E2.8           | 0.29 | 0.29 | 0.30 | 0.29 | 0.44 | 0.43 | 0.46 | 0.44 | 1.49 |
| Q09543 | paa-1 F48E8.5                  | 0.37 | 0.37 | 0.18 | 0.31 | 0.48 | 0.42 | 0.49 | 0.46 | 1.49 |
| Q9U302 | pab-1 CELE_Y106G6H.2 Y106G6H.2 | 0.30 | 0.30 | 0.32 | 0.31 | 0.46 | 0.46 | 0.45 | 0.46 | 1.49 |
| Q17849 | hsp-25 C09B8.6 CELE_C09B8.6    | 0.00 | 0.39 | 0.31 | 0.23 | 0.00 | 0.61 | 0.43 | 0.35 | 1.49 |
| O45148 | dlst-1 CELE_W02F12.5 W02F12.5  | 0.32 | 0.30 | 0.31 | 0.31 | 0.44 | 0.50 | 0.44 | 0.46 | 1.50 |
| O01974 | eif-3.H C41D11.2               | 0.35 | 0.24 | 0.40 | 0.33 | 0.42 | 0.54 | 0.52 | 0.49 | 1.50 |
| H9G2P9 | cbs-1 CELE_ZC373.1 ZC373.1     | 0.00 | 0.30 | 0.33 | 0.21 | 0.00 | 0.46 | 0.48 | 0.31 | 1.50 |
| Q21732 | CELE_R04F11.2 R04F11.2         | 0.29 | 0.29 | 0.30 | 0.29 | 0.44 | 0.44 | 0.43 | 0.44 | 1.50 |
| O45319 | tin-13 tim-13 DY3.1            | 0.31 | 0.26 | 0.31 | 0.29 | 0.42 | 0.46 | 0.44 | 0.44 | 1.50 |
| Q23500 | aco-1 gei-22 ZK455.1           | 0.31 | 0.30 | 0.31 | 0.31 | 0.47 | 0.45 | 0.46 | 0.46 | 1.50 |
| Q19853 | CELE_F28B4.3 F28B4.3           | 0.33 | 0.31 | 0.31 | 0.32 | 0.45 | 0.47 | 0.49 | 0.47 | 1.50 |
| Q86S26 | pmp-5 CELE_T10H9.5 T10H9.5     | 0.40 | 0.31 | 0.31 | 0.34 | 0.60 | 0.47 | 0.48 | 0.51 | 1.50 |
| P41932 | par-5 fit-1 M117.2             | 0.29 | 0.31 | 0.31 | 0.30 | 0.45 | 0.45 | 0.46 | 0.46 | 1.50 |
| Q20626 | CELE_F49E2.5 F49E2.5           | 0.40 | 0.25 | 0.32 | 0.32 | 0.60 | 0.40 | 0.44 | 0.48 | 1.50 |
| Q20053 | asb-1 CELE_F35G12.10 F35G12.10 | 0.27 | 0.32 | 0.38 | 0.32 | 0.51 | 0.42 | 0.52 | 0.48 | 1.50 |
| Q9BL03 | CELE_Y54F10AM.5 Y54F10AM.5     | 0.30 | 0.28 | 0.26 | 0.28 | 0.43 | 0.37 | 0.45 | 0.42 | 1.50 |
| G5EEK9 | vha-5 CELE_F35H10.4 F35H10.4   | 0.32 | 0.29 | 0.00 | 0.20 | 0.45 | 0.47 | 0.00 | 0.31 | 1.50 |
| P34334 | rpl-21 C14B9.7                 | 0.32 | 0.30 | 0.30 | 0.31 | 0.46 | 0.47 | 0.45 | 0.46 | 1.50 |
| Q20203 | csq-1 CELE_F40E10.3 F40E10.3   | 0.37 | 0.29 | 0.28 | 0.31 | 0.44 | 0.46 | 0.51 | 0.47 | 1.50 |
| P49049 | imp-2 T05E11.5                 | 0.28 | 0.27 | 0.38 | 0.31 | 0.50 | 0.47 | 0.42 | 0.46 | 1.50 |
| O45218 | ads-1 Y50D7A.7                 | 0.29 | 0.28 | 0.30 | 0.29 | 0.44 | 0.46 | 0.42 | 0.44 | 1.50 |
| Q9U241 | CELE_Y56A3A.19 Y56A3A.19       | 0.31 | 0.34 | 0.39 | 0.35 | 0.51 | 0.46 | 0.61 | 0.52 | 1.50 |
| O01812 | lbp-6 W02D3.5                  | 0.32 | 0.29 | 0.31 | 0.31 | 0.46 | 0.47 | 0.45 | 0.46 | 1.50 |
| Q19869 | rpl-26 F28C6.7                 | 0.31 | 0.30 | 0.31 | 0.31 | 0.45 | 0.45 | 0.48 | 0.46 | 1.50 |
| Q22038 | rho-1 rhoa Y51H4A.3            | 0.30 | 0.30 | 0.31 | 0.30 | 0.46 | 0.45 | 0.45 | 0.45 | 1.50 |
| Q9N5E4 | CELE_T02H6.11 T02H6.11         | 0.36 | 0.30 | 0.28 | 0.31 | 0.46 | 0.47 | 0.48 | 0.47 | 1.50 |
| P91477 | pbs-4 T20F5.2                  | 0.35 | 0.00 | 0.27 | 0.21 | 0.50 | 0.00 | 0.43 | 0.31 | 1.50 |
| O17759 | tkt-1 CELE_F01G10.1 F01G10.1   | 0.28 | 0.32 | 0.31 | 0.30 | 0.45 | 0.47 | 0.45 | 0.46 | 1.50 |

|        |                                   |      |      |      |      |      |      |      |      |      |
|--------|-----------------------------------|------|------|------|------|------|------|------|------|------|
| Q19007 | nap-1 CELE_D2096.8 D2096.8        | 0.30 | 0.30 | 0.30 | 0.30 | 0.45 | 0.45 | 0.45 | 0.45 | 1.50 |
| P34559 | ech-6 T05G5.6                     | 0.29 | 0.29 | 0.30 | 0.29 | 0.44 | 0.45 | 0.44 | 0.44 | 1.50 |
| G4SPY0 | CELE_Y71G10AL.1 Y71G10AL.1        | 0.00 | 0.32 | 0.00 | 0.11 | 0.00 | 0.48 | 0.00 | 0.16 | 1.50 |
| P50140 | hsp-60 hsp60 Y22D7AL.5            | 0.30 | 0.29 | 0.30 | 0.30 | 0.44 | 0.46 | 0.45 | 0.45 | 1.51 |
| O01504 | rpa-2 C37A2.7                     | 0.31 | 0.28 | 0.30 | 0.30 | 0.45 | 0.45 | 0.45 | 0.45 | 1.51 |
| Q9TXI4 | CELE_F23C8.5 F23C8.5              | 0.30 | 0.28 | 0.30 | 0.30 | 0.44 | 0.46 | 0.44 | 0.44 | 1.51 |
| O01542 | cpn-3 CELE_F28H1.2 F28H1.2        | 0.29 | 0.30 | 0.31 | 0.30 | 0.46 | 0.45 | 0.44 | 0.45 | 1.51 |
| Q9XWS4 | rpl-30 CELE_Y106G6H.3 Y106G6H.3   | 0.32 | 0.31 | 0.30 | 0.31 | 0.47 | 0.47 | 0.47 | 0.47 | 1.51 |
| P54216 | aldo-1 T05D4.1                    | 0.31 | 0.28 | 0.30 | 0.30 | 0.44 | 0.45 | 0.46 | 0.45 | 1.51 |
| P52819 | rpl-22 C27A2.2                    | 0.30 | 0.29 | 0.31 | 0.30 | 0.45 | 0.46 | 0.46 | 0.45 | 1.51 |
| Q22021 | R53.4                             | 0.36 | 0.29 | 0.28 | 0.31 | 0.51 | 0.45 | 0.43 | 0.47 | 1.51 |
| Q22620 | pars-1 CELE_T20H4.3 T20H4.3       | 0.28 | 0.30 | 0.30 | 0.29 | 0.47 | 0.44 | 0.42 | 0.44 | 1.51 |
| P51403 | rps-2 C49H3.11                    | 0.31 | 0.31 | 0.29 | 0.30 | 0.46 | 0.45 | 0.46 | 0.46 | 1.51 |
| O02286 | pck-2 CELE_R11A5.4 R11A5.4        | 0.30 | 0.29 | 0.29 | 0.29 | 0.45 | 0.45 | 0.43 | 0.44 | 1.51 |
| Q21067 | ifc-2 M6.1                        | 0.36 | 0.30 | 0.30 | 0.32 | 0.51 | 0.45 | 0.48 | 0.48 | 1.51 |
| Q93615 | F27D4.1                           | 0.29 | 0.29 | 0.30 | 0.29 | 0.44 | 0.45 | 0.43 | 0.44 | 1.51 |
| H2KZG6 | acdh-1 C55B7.4 CELE_C55B7.4       | 0.29 | 0.30 | 0.30 | 0.30 | 0.45 | 0.46 | 0.45 | 0.45 | 1.51 |
| Q93573 | tct-1 F25H2.11                    | 0.30 | 0.30 | 0.29 | 0.30 | 0.45 | 0.45 | 0.44 | 0.45 | 1.51 |
| Q9U2X0 | prmt-1 CELE_Y113G7B.17 Y113G7B.17 | 0.29 | 0.29 | 0.30 | 0.29 | 0.44 | 0.45 | 0.43 | 0.44 | 1.51 |
| P18948 | vit-6 K07H8.6                     | 0.28 | 0.27 | 0.28 | 0.28 | 0.42 | 0.42 | 0.42 | 0.42 | 1.51 |
| O01806 | C44E4.4 CELE_C44E4.4              | 0.30 | 0.24 | 0.33 | 0.29 | 0.45 | 0.44 | 0.43 | 0.44 | 1.51 |
| P34382 | far-1 F02A9.2                     | 0.29 | 0.28 | 0.30 | 0.29 | 0.44 | 0.44 | 0.45 | 0.44 | 1.51 |
| Q9N4H7 | copa-1 CELE_Y71F9AL.17 Y71F9AL.17 | 0.30 | 0.31 | 0.27 | 0.29 | 0.47 | 0.45 | 0.41 | 0.44 | 1.51 |
| Q20507 | acbp-3 F47B10.7                   | 0.29 | 0.29 | 0.31 | 0.30 | 0.48 | 0.44 | 0.43 | 0.45 | 1.51 |
| P29691 | eef-2 F25H5.4                     | 0.30 | 0.30 | 0.30 | 0.30 | 0.45 | 0.46 | 0.44 | 0.45 | 1.52 |
| Q9N3D9 | nduf-5 CELE_Y54E10BL.5 Y54E10BL.5 | 0.41 | 0.23 | 0.24 | 0.29 | 0.36 | 0.47 | 0.51 | 0.45 | 1.52 |
| Q93576 | ndk-1 CELE_F25H2.5 F25H2.5        | 0.28 | 0.28 | 0.29 | 0.28 | 0.44 | 0.42 | 0.43 | 0.43 | 1.52 |
| Q21233 | nuo-4 CELE_K04G7.4 K04G7.4        | 0.32 | 0.28 | 0.31 | 0.30 | 0.56 | 0.37 | 0.44 | 0.46 | 1.52 |
| O17643 | idh-2 C34F6.8 CELE_C34F6.8        | 0.00 | 0.40 | 0.00 | 0.13 | 0.00 | 0.60 | 0.00 | 0.20 | 1.52 |
| Q22100 | kat-1 T02G5.8                     | 0.31 | 0.26 | 0.37 | 0.31 | 0.54 | 0.48 | 0.42 | 0.48 | 1.52 |
| G5EC91 | dpy-11 CELE_F46E10.9 F46E10.9     | 0.31 | 0.30 | 0.27 | 0.29 | 0.43 | 0.45 | 0.45 | 0.44 | 1.52 |
| P53588 | suca-1 F47B10.1                   | 0.32 | 0.31 | 0.28 | 0.31 | 0.46 | 0.50 | 0.42 | 0.46 | 1.52 |
| O17214 | fum-1 H14A12.2                    | 0.30 | 0.32 | 0.28 | 0.30 | 0.46 | 0.44 | 0.47 | 0.46 | 1.52 |
| Q9UAV5 | mdh-1 CELE_F46E10.10 F46E10.10    | 0.30 | 0.30 | 0.29 | 0.30 | 0.44 | 0.46 | 0.46 | 0.45 | 1.52 |
| Q21193 | pfn-3 K03E6.6                     | 0.00 | 0.00 | 0.30 | 0.10 | 0.00 | 0.00 | 0.45 | 0.15 | 1.52 |
| O17536 | hil-4 C18G1.5                     | 0.30 | 0.30 | 0.34 | 0.31 | 0.49 | 0.48 | 0.45 | 0.47 | 1.52 |
| G5ED07 | pdi-3 CELE_H06O01.1 H06O01.1      | 0.30 | 0.30 | 0.30 | 0.30 | 0.45 | 0.46 | 0.46 | 0.46 | 1.52 |
| Q9N3X2 | rps-4 Y43B11AR.4                  | 0.28 | 0.28 | 0.31 | 0.29 | 0.45 | 0.44 | 0.44 | 0.44 | 1.52 |
| Q20719 | F53F4.10                          | 0.31 | 0.29 | 0.28 | 0.29 | 0.42 | 0.49 | 0.44 | 0.45 | 1.53 |
| O62277 | dct-18 CELE_F58G1.4 F58G1.4       | 0.29 | 0.29 | 0.28 | 0.29 | 0.45 | 0.43 | 0.43 | 0.44 | 1.53 |
| Q27371 | mup-2 T22E5.5                     | 0.29 | 0.28 | 0.35 | 0.31 | 0.48 | 0.47 | 0.44 | 0.47 | 1.53 |
| O17271 | heh-1 R148.6                      | 0.30 | 0.38 | 0.33 | 0.34 | 0.42 | 0.64 | 0.50 | 0.52 | 1.53 |
| H2KYR1 | vig-1 CELE_F56D12.5 F56D12.5      | 0.31 | 0.28 | 0.31 | 0.30 | 0.45 | 0.48 | 0.45 | 0.46 | 1.53 |
| P27420 | hsp-3 hsp70c C15H9.6              | 0.32 | 0.29 | 0.29 | 0.30 | 0.46 | 0.45 | 0.47 | 0.46 | 1.53 |
| G1K0V8 | iff-1 CELE_T05G5.10 T05G5.10      | 0.28 | 0.30 | 0.00 | 0.19 | 0.42 | 0.47 | 0.00 | 0.30 | 1.53 |
| O62146 | F09B12.3                          | 0.00 | 0.30 | 0.25 | 0.18 | 0.00 | 0.50 | 0.35 | 0.28 | 1.53 |
| G5EC31 | alh-6 CELE_F56D12.1 F56D12.1      | 0.31 | 0.31 | 0.29 | 0.30 | 0.47 | 0.47 | 0.45 | 0.46 | 1.53 |
| Q18421 | C34C12.8                          | 0.28 | 0.24 | 0.34 | 0.29 | 0.47 | 0.46 | 0.39 | 0.44 | 1.53 |
| Q18688 | daf-21 C47E8.5                    | 0.30 | 0.30 | 0.30 | 0.30 | 0.46 | 0.47 | 0.46 | 0.46 | 1.53 |
| Q21465 | zig-12 CELE_M02D8.1 M02D8.1       | 0.00 | 0.28 | 0.33 | 0.20 | 0.00 | 0.46 | 0.46 | 0.31 | 1.53 |

|        |                                                                                  |      |      |      |      |      |      |      |      |      |
|--------|----------------------------------------------------------------------------------|------|------|------|------|------|------|------|------|------|
| O01868 | rpl-24.1 D1007.12                                                                | 0.28 | 0.29 | 0.28 | 0.28 | 0.43 | 0.44 | 0.44 | 0.44 | 1.54 |
| H2KYQ5 | gyg-1 F56B6.4                                                                    | 0.31 | 0.00 | 0.00 | 0.10 | 0.47 | 0.00 | 0.00 | 0.16 | 1.54 |
| Q966C7 | tald-1 CELE_Y24D9A.8 Y24D9A.8                                                    | 0.31 | 0.29 | 0.29 | 0.29 | 0.45 | 0.45 | 0.46 | 0.45 | 1.54 |
| Q9XW92 | vha-13 Y49A3A.2                                                                  | 0.30 | 0.29 | 0.29 | 0.29 | 0.45 | 0.45 | 0.45 | 0.45 | 1.54 |
| Q20780 | alh-1 CELE_F54D8.3 F54D8.3                                                       | 0.29 | 0.31 | 0.29 | 0.30 | 0.46 | 0.45 | 0.45 | 0.45 | 1.54 |
| Q9GYK2 | C05D9.3                                                                          | 0.39 | 0.00 | 0.00 | 0.13 | 0.61 | 0.00 | 0.00 | 0.20 | 1.54 |
| H2KZS2 | CELE_T23E7.2 T23E7.2                                                             | 0.32 | 0.28 | 0.26 | 0.29 | 0.43 | 0.47 | 0.44 | 0.44 | 1.54 |
| Q8MNU8 | C29E4.12                                                                         | 0.27 | 0.32 | 0.00 | 0.20 | 0.48 | 0.43 | 0.00 | 0.31 | 1.54 |
| Q45444 | clec-63 CELE_F35C5.6 F35C5.6                                                     | 0.29 | 0.28 | 0.31 | 0.29 | 0.48 | 0.42 | 0.45 | 0.45 | 1.54 |
| Q9GRZ9 | tcc-1 CELE_Y59A8A.3 Y59A8A.3                                                     | 0.21 | 0.00 | 0.26 | 0.16 | 0.38 | 0.00 | 0.34 | 0.24 | 1.54 |
| O16462 | grd-5 CELE_F41E6.2 F41E6.2                                                       | 0.28 | 0.31 | 0.27 | 0.29 | 0.45 | 0.42 | 0.46 | 0.44 | 1.54 |
| P27798 | crt-1 Y38A10A.5                                                                  | 0.30 | 0.29 | 0.29 | 0.29 | 0.44 | 0.45 | 0.46 | 0.45 | 1.54 |
| O17732 | pyc-1 D2023.2                                                                    | 0.28 | 0.27 | 0.33 | 0.29 | 0.53 | 0.40 | 0.42 | 0.45 | 1.54 |
| P91020 | C07D8.6 CELE_C07D8.6                                                             | 0.31 | 0.27 | 0.30 | 0.29 | 0.43 | 0.45 | 0.47 | 0.45 | 1.54 |
| Q17967 | pdi-1 C14B1.1                                                                    | 0.29 | 0.28 | 0.29 | 0.29 | 0.45 | 0.45 | 0.45 | 0.45 | 1.54 |
| Q65ZK0 | rars-1 CELE_F26F4.10 F26F4.10                                                    | 0.27 | 0.31 | 0.34 | 0.30 | 0.53 | 0.46 | 0.43 | 0.47 | 1.54 |
| Q19289 | ifb-1 F10C1.2                                                                    | 0.30 | 0.30 | 0.30 | 0.30 | 0.46 | 0.47 | 0.46 | 0.46 | 1.55 |
| P17329 | gpd-2 K10B3.8                                                                    | 0.28 | 0.31 | 0.30 | 0.30 | 0.47 | 0.46 | 0.45 | 0.46 | 1.55 |
| O17626 | C31C9.2 CELE_C31C9.2                                                             | 0.25 | 0.32 | 0.28 | 0.29 | 0.45 | 0.44 | 0.44 | 0.44 | 1.55 |
| Q94269 | CELE_K10C2.1 K10C2.1                                                             | 0.32 | 0.40 | 0.30 | 0.34 | 0.46 | 0.60 | 0.51 | 0.53 | 1.55 |
| Q86S66 | icd-2 Y65B4BR.5                                                                  | 0.30 | 0.29 | 0.31 | 0.30 | 0.46 | 0.45 | 0.47 | 0.46 | 1.55 |
| P52713 | alh-8 F13D12.4                                                                   | 0.30 | 0.29 | 0.30 | 0.30 | 0.45 | 0.47 | 0.46 | 0.46 | 1.55 |
| P27604 | ahcy-1 ahh dpy-14 K02F2.2                                                        | 0.29 | 0.29 | 0.29 | 0.29 | 0.46 | 0.46 | 0.45 | 0.45 | 1.55 |
| Q23315 | ears-1 CELE_ZC434.5 ZC434.5                                                      | 0.29 | 0.36 | 0.27 | 0.31 | 0.53 | 0.42 | 0.48 | 0.48 | 1.55 |
| Q95Y90 | rpl-9 R13A5.8                                                                    | 0.29 | 0.30 | 0.28 | 0.29 | 0.45 | 0.46 | 0.45 | 0.45 | 1.55 |
| Q44989 | col-49 CELE_K09H9.3 K09H9.3                                                      | 0.20 | 0.11 | 0.15 | 0.15 | 0.22 | 0.24 | 0.25 | 0.24 | 1.55 |
| Q20412 | F44G4.2                                                                          | 0.00 | 0.27 | 0.31 | 0.19 | 0.00 | 0.44 | 0.45 | 0.30 | 1.55 |
| O45293 | gly-8 Y66A7A.6                                                                   | 0.00 | 0.00 | 0.30 | 0.10 | 0.00 | 0.00 | 0.47 | 0.16 | 1.55 |
| G5EDZ9 | cpi-1 CELE_K08B4.6 K08B4.6                                                       | 0.39 | 0.00 | 0.00 | 0.13 | 0.61 | 0.00 | 0.00 | 0.20 | 1.55 |
| Q18803 | asg-2 C53B7.4                                                                    | 0.29 | 0.30 | 0.30 | 0.30 | 0.49 | 0.47 | 0.42 | 0.46 | 1.55 |
| O17680 | sams-1 C49F5.1                                                                   | 0.30 | 0.30 | 0.31 | 0.30 | 0.47 | 0.48 | 0.46 | 0.47 | 1.55 |
| O45622 | erfa-3 CELE_H19N07.1 H19N07.1                                                    | 0.30 | 0.29 | 0.29 | 0.29 | 0.46 | 0.47 | 0.44 | 0.45 | 1.55 |
| Q18787 | rpt-1 C52E4.4                                                                    | 0.00 | 0.27 | 0.30 | 0.19 | 0.00 | 0.45 | 0.43 | 0.30 | 1.55 |
| Q05036 | hsp-110 C30C11.4                                                                 | 0.30 | 0.30 | 0.29 | 0.30 | 0.46 | 0.47 | 0.47 | 0.47 | 1.55 |
| Q9NEW6 | rsp-3 Y111B2A.18                                                                 | 0.24 | 0.31 | 0.22 | 0.26 | 0.41 | 0.42 | 0.37 | 0.40 | 1.56 |
| Q17761 | T25B9.9                                                                          | 0.33 | 0.27 | 0.30 | 0.30 | 0.45 | 0.48 | 0.45 | 0.46 | 1.56 |
| P46561 | atp-2 C34E10.6                                                                   | 0.30 | 0.27 | 0.28 | 0.29 | 0.44 | 0.45 | 0.44 | 0.45 | 1.56 |
| Q44156 | pas-6 CD4.6                                                                      | 0.28 | 0.29 | 0.29 | 0.29 | 0.42 | 0.47 | 0.45 | 0.45 | 1.56 |
| Q09261 | mrps-31 C32A3.2                                                                  | 0.29 | 0.00 | 0.00 | 0.10 | 0.45 | 0.00 | 0.00 | 0.15 | 1.56 |
| Q2L6Y6 | hsp-75 CELE_R151.7 R151.7                                                        | 0.29 | 0.00 | 0.00 | 0.10 | 0.45 | 0.00 | 0.00 | 0.15 | 1.56 |
| Q21752 | vdac-1 R05G6.7                                                                   | 0.30 | 0.30 | 0.29 | 0.29 | 0.46 | 0.45 | 0.46 | 0.46 | 1.56 |
| G5EEE5 | elo-1 ceelo1 CELE_F56H11.4 F56H11.4                                              | 0.29 | 0.30 | 0.30 | 0.29 | 0.45 | 0.48 | 0.45 | 0.46 | 1.56 |
| O44480 | rpl-20 E04A4.8                                                                   | 0.28 | 0.29 | 0.31 | 0.29 | 0.45 | 0.47 | 0.45 | 0.46 | 1.56 |
| P04255 | his-11 ZK131.5; his-15 ZK131.9; his-29 F35H10.11; his-34 F17E9.9; his-44 F08G2.1 | 0.29 | 0.28 | 0.30 | 0.29 | 0.45 | 0.46 | 0.45 | 0.45 | 1.56 |
| Q21215 | rack-1 K04D7.1                                                                   | 0.28 | 0.30 | 0.30 | 0.29 | 0.46 | 0.46 | 0.46 | 0.46 | 1.56 |
| P41938 | B0272.3                                                                          | 0.29 | 0.24 | 0.30 | 0.28 | 0.41 | 0.41 | 0.48 | 0.44 | 1.56 |
| Q20206 | rps-11 CELE_F40F11.1 F40F11.1                                                    | 0.29 | 0.29 | 0.28 | 0.29 | 0.46 | 0.44 | 0.44 | 0.45 | 1.56 |
| Q9GZE9 | ldp-1 CELE_F22F7.1 F22F7.1                                                       | 0.32 | 0.25 | 0.31 | 0.29 | 0.41 | 0.56 | 0.41 | 0.46 | 1.57 |
| Q95YD5 | vha-16 C30F8.2 CELE_C30F8.2                                                      | 0.27 | 0.26 | 0.33 | 0.29 | 0.44 | 0.46 | 0.46 | 0.45 | 1.57 |
| O16264 | F40A3.3                                                                          | 0.32 | 0.30 | 0.31 | 0.31 | 0.44 | 0.57 | 0.44 | 0.48 | 1.57 |

|        |                                  |      |      |      |      |      |      |      |      |      |
|--------|----------------------------------|------|------|------|------|------|------|------|------|------|
| Q9XUS5 | CELE_K08E3.5 K08E3.5             | 0.23 | 0.00 | 0.00 | 0.08 | 0.36 | 0.00 | 0.00 | 0.12 | 1.57 |
| Q20228 | rps-9 F40F8.10                   | 0.29 | 0.30 | 0.29 | 0.29 | 0.47 | 0.45 | 0.46 | 0.46 | 1.57 |
| Q9N599 | pas-3 Y110A7A.14                 | 0.31 | 0.32 | 0.29 | 0.31 | 0.45 | 0.44 | 0.54 | 0.48 | 1.57 |
| O76840 | <b>mig-6 ppn-1 C37C3.6</b>       | 0.28 | 0.28 | 0.29 | 0.28 | 0.47 | 0.43 | 0.44 | 0.44 | 1.57 |
| O17218 | rps-22 CELE_F53A3.3 F53A3.3      | 0.32 | 0.30 | 0.29 | 0.30 | 0.48 | 0.46 | 0.47 | 0.47 | 1.57 |
| P91374 | rpl-15 K11H12.2                  | 0.29 | 0.31 | 0.29 | 0.30 | 0.47 | 0.46 | 0.47 | 0.47 | 1.57 |
| O44906 | pck-1 CELE_W05G11.6 W05G11.6     | 0.28 | 0.25 | 0.30 | 0.28 | 0.40 | 0.45 | 0.46 | 0.43 | 1.57 |
| O01761 | unc-89 C09D1.1                   | 0.30 | 0.28 | 0.29 | 0.29 | 0.44 | 0.46 | 0.45 | 0.45 | 1.57 |
| O02158 | CELE_T09B4.8 T09B4.8             | 0.00 | 0.30 | 0.00 | 0.10 | 0.00 | 0.46 | 0.00 | 0.15 | 1.57 |
| H2KYJ5 | mtch-1 CELE_F43E2.7 F43E2.7      | 0.24 | 0.37 | 0.33 | 0.31 | 0.51 | 0.52 | 0.44 | 0.49 | 1.57 |
| P52717 | F41C3.5                          | 0.29 | 0.29 | 0.28 | 0.29 | 0.46 | 0.44 | 0.44 | 0.45 | 1.57 |
| P91913 | rla-1 rpa-1 Y37E3.7              | 0.30 | 0.29 | 0.28 | 0.29 | 0.46 | 0.45 | 0.47 | 0.46 | 1.57 |
| P90868 | pbs-7 CELE_F39H11.5 F39H11.5     | 0.25 | 0.00 | 0.32 | 0.19 | 0.45 | 0.00 | 0.44 | 0.30 | 1.57 |
| O45865 | ant-1.1 CELE_T27E9.1 T27E9.1     | 0.29 | 0.28 | 0.30 | 0.29 | 0.45 | 0.46 | 0.45 | 0.45 | 1.57 |
| Q95QW0 | eif-3.L C17G10.9                 | 0.00 | 0.31 | 0.31 | 0.21 | 0.00 | 0.52 | 0.46 | 0.33 | 1.57 |
| Q9U1X9 | rla-2 CELE_Y62E10A.1 Y62E10A.1   | 0.27 | 0.27 | 0.29 | 0.28 | 0.42 | 0.43 | 0.45 | 0.43 | 1.57 |
| O16309 | fkf-3 C05C8.3 CELE_C05C8.3       | 0.29 | 0.24 | 0.28 | 0.27 | 0.44 | 0.38 | 0.46 | 0.43 | 1.57 |
| Q9U1Q4 | vrs-2 Y87G2A.5                   | 0.29 | 0.31 | 0.29 | 0.30 | 0.46 | 0.47 | 0.47 | 0.47 | 1.57 |
| P48156 | rps-8 F42C5.8                    | 0.28 | 0.28 | 0.30 | 0.29 | 0.45 | 0.46 | 0.45 | 0.45 | 1.58 |
| Q9N4I4 | rpl-10a rpl-1 Y71F9AL.13         | 0.28 | 0.29 | 0.28 | 0.28 | 0.44 | 0.45 | 0.45 | 0.45 | 1.58 |
| Q27487 | ctl-2 cat cat-1 Y54G11A.5        | 0.27 | 0.24 | 0.28 | 0.26 | 0.44 | 0.38 | 0.41 | 0.41 | 1.58 |
| P34496 | mtss-1 PAR2.1                    | 0.30 | 0.00 | 0.00 | 0.10 | 0.48 | 0.00 | 0.00 | 0.16 | 1.58 |
| P46769 | rps-0 B0393.1                    | 0.30 | 0.29 | 0.29 | 0.29 | 0.46 | 0.46 | 0.46 | 0.46 | 1.58 |
| O45946 | rpl-18 Y45F10D.12                | 0.29 | 0.28 | 0.29 | 0.29 | 0.45 | 0.45 | 0.45 | 0.45 | 1.58 |
| O17586 | pas-1 C15H11.7                   | 0.32 | 0.29 | 0.26 | 0.29 | 0.46 | 0.44 | 0.47 | 0.46 | 1.58 |
| O45499 | rps-26 F39B2.6                   | 0.29 | 0.28 | 0.29 | 0.29 | 0.45 | 0.46 | 0.46 | 0.45 | 1.58 |
| P48162 | rpl-25.1 F55D10.2                | 0.29 | 0.31 | 0.30 | 0.30 | 0.48 | 0.47 | 0.48 | 0.47 | 1.58 |
| P91917 | ola-1 tag-210 W08E3.3            | 0.28 | 0.27 | 0.30 | 0.28 | 0.46 | 0.44 | 0.44 | 0.45 | 1.58 |
| O02266 | alh-7 CELE_F45H10.1 F45H10.1     | 0.29 | 0.00 | 0.00 | 0.10 | 0.46 | 0.00 | 0.00 | 0.15 | 1.58 |
| Q09581 | lec-3 ZK892.1                    | 0.00 | 0.34 | 0.27 | 0.20 | 0.00 | 0.47 | 0.49 | 0.32 | 1.58 |
| P34383 | far-2 F02A9.3                    | 0.27 | 0.29 | 0.27 | 0.28 | 0.43 | 0.44 | 0.44 | 0.44 | 1.58 |
| Q27493 | rpoa-2 CELE_F14B4.3 F14B4.3      | 0.30 | 0.00 | 0.00 | 0.10 | 0.47 | 0.00 | 0.00 | 0.16 | 1.58 |
| P34500 | ttr-2 K03H1.4                    | 0.29 | 0.30 | 0.31 | 0.30 | 0.50 | 0.46 | 0.47 | 0.47 | 1.58 |
| G5EEA8 | nex-1 NEX-1 CELE_ZC155.1 ZC155.1 | 0.29 | 0.29 | 0.29 | 0.29 | 0.45 | 0.47 | 0.45 | 0.46 | 1.58 |
| O44750 | app-1 W03G9.4                    | 0.26 | 0.00 | 0.32 | 0.19 | 0.47 | 0.00 | 0.45 | 0.31 | 1.58 |
| O02639 | rpl-19 C09D4.5                   | 0.32 | 0.28 | 0.29 | 0.29 | 0.43 | 0.45 | 0.52 | 0.47 | 1.58 |
| O17528 | sel-9 W02D7.7                    | 0.30 | 0.27 | 0.28 | 0.28 | 0.45 | 0.44 | 0.45 | 0.45 | 1.58 |
| Q9N5V3 | imb-3 C53D5.6 CELE_C53D5.6       | 0.27 | 0.30 | 0.30 | 0.29 | 0.45 | 0.47 | 0.46 | 0.46 | 1.58 |
| Q9BKP8 | C17F4.7 CELE_C17F4.7             | 0.28 | 0.31 | 0.27 | 0.29 | 0.45 | 0.45 | 0.47 | 0.46 | 1.58 |
| Q17993 | C14F11.6 CELE_C14F11.6           | 0.00 | 0.31 | 0.00 | 0.10 | 0.00 | 0.49 | 0.00 | 0.16 | 1.58 |
| P34662 | rpl-35 ZK652.4                   | 0.26 | 0.29 | 0.29 | 0.28 | 0.45 | 0.43 | 0.45 | 0.44 | 1.58 |
| P41994 | rpa-1 B0280.3                    | 0.27 | 0.28 | 0.27 | 0.27 | 0.43 | 0.45 | 0.42 | 0.43 | 1.58 |
| O76449 | CELE_ZK1055.7 ZK1055.7           | 0.32 | 0.29 | 0.00 | 0.20 | 0.42 | 0.55 | 0.00 | 0.32 | 1.58 |
| Q9GYF1 | unc-27 tni-2 ZK721.2             | 0.30 | 0.28 | 0.31 | 0.29 | 0.46 | 0.48 | 0.47 | 0.47 | 1.58 |
| Q21926 | irs-1 R11A8.6                    | 0.29 | 0.30 | 0.30 | 0.30 | 0.47 | 0.48 | 0.47 | 0.47 | 1.59 |
| P48152 | rps-3 C23G10.3                   | 0.29 | 0.29 | 0.29 | 0.29 | 0.45 | 0.47 | 0.45 | 0.46 | 1.59 |
| Q22370 | ucr-2.2 CELE_T10B10.2 T10B10.2   | 0.26 | 0.29 | 0.28 | 0.28 | 0.44 | 0.44 | 0.44 | 0.44 | 1.59 |
| Q19246 | dhs-25 CELE_F09E10.3 F09E10.3    | 0.29 | 0.26 | 0.34 | 0.30 | 0.45 | 0.50 | 0.46 | 0.47 | 1.59 |
| G5EEI4 | asp-1 CELE_Y39B6A.20 Y39B6A.20   | 0.24 | 0.24 | 0.24 | 0.24 | 0.38 | 0.39 | 0.38 | 0.38 | 1.59 |
| P34690 | tba-2 C47B2.3                    | 0.28 | 0.27 | 0.28 | 0.27 | 0.44 | 0.44 | 0.43 | 0.44 | 1.59 |

|        |                                        |      |      |      |      |      |      |      |      |      |
|--------|----------------------------------------|------|------|------|------|------|------|------|------|------|
| Q23588 | upp-1 ZK783.2                          | 0.25 | 0.00 | 0.00 | 0.08 | 0.40 | 0.00 | 0.00 | 0.13 | 1.59 |
| Q7Z072 | tnt-2 CELE_F53A9.10 F53A9.10           | 0.29 | 0.29 | 0.29 | 0.29 | 0.46 | 0.46 | 0.46 | 0.46 | 1.59 |
| P37806 | unc-87 F08B6.4                         | 0.28 | 0.30 | 0.28 | 0.29 | 0.48 | 0.44 | 0.46 | 0.46 | 1.59 |
| Q8WSN3 | spp-17 C54G6.5 CELE_C54G6.5            | 0.00 | 0.00 | 0.31 | 0.10 | 0.00 | 0.00 | 0.49 | 0.16 | 1.59 |
| O18000 | pes-9 CELE_R11H6.1 R11H6.1             | 0.28 | 0.28 | 0.30 | 0.29 | 0.47 | 0.45 | 0.45 | 0.46 | 1.59 |
| O45012 | noi-5 CELE_W01B11.3 W01B11.3           | 0.30 | 0.28 | 0.30 | 0.29 | 0.48 | 0.47 | 0.46 | 0.47 | 1.59 |
| Q93831 | CELE_F59C6.5 F59C6.5                   | 0.28 | 0.27 | 0.31 | 0.28 | 0.47 | 0.47 | 0.42 | 0.45 | 1.60 |
| Q93619 | tag-173 CELE_F27D4.5 F27D4.5           | 0.27 | 0.25 | 0.29 | 0.27 | 0.40 | 0.34 | 0.55 | 0.43 | 1.60 |
| O17919 | K01G5.5                                | 0.27 | 0.30 | 0.30 | 0.29 | 0.46 | 0.47 | 0.46 | 0.46 | 1.60 |
| Q93934 | CELE_R07H5.8 R07H5.8                   | 0.29 | 0.30 | 0.29 | 0.29 | 0.47 | 0.46 | 0.46 | 0.46 | 1.60 |
| P53589 | sucg-1 C50F7.4                         | 0.30 | 0.28 | 0.30 | 0.29 | 0.48 | 0.45 | 0.47 | 0.47 | 1.60 |
| Q9N5S7 | CELE_F49H12.5 F49H12.5                 | 0.29 | 0.26 | 0.30 | 0.28 | 0.46 | 0.48 | 0.42 | 0.45 | 1.60 |
| P12844 | myo-3 mhcA K12F2.1                     | 0.30 | 0.31 | 0.29 | 0.30 | 0.49 | 0.48 | 0.48 | 0.49 | 1.60 |
| Q93572 | rpa-0 F25H2.10                         | 0.29 | 0.29 | 0.29 | 0.29 | 0.47 | 0.47 | 0.46 | 0.46 | 1.60 |
| Q17474 | B0334.3 CELE_B0334.3                   | 0.00 | 0.28 | 0.26 | 0.18 | 0.00 | 0.41 | 0.45 | 0.29 | 1.60 |
| Q9TXU7 | eif-1.a eif-1.A CELE_H06H21.3 H06H21.3 | 0.30 | 0.29 | 0.27 | 0.29 | 0.46 | 0.45 | 0.48 | 0.46 | 1.61 |
| O44503 | CELE_R02D3.1 R02D3.1                   | 0.26 | 0.00 | 0.27 | 0.18 | 0.38 | 0.00 | 0.46 | 0.28 | 1.61 |
| Q18310 | C29F5.1 CELE_C29F5.1                   | 0.00 | 0.32 | 0.28 | 0.20 | 0.00 | 0.49 | 0.47 | 0.32 | 1.61 |
| Q21735 | ran-4 R05D11.3                         | 0.29 | 0.00 | 0.28 | 0.19 | 0.47 | 0.00 | 0.45 | 0.30 | 1.61 |
| Q95Y28 | CELE_Y34B4A.9 Y34B4A.9                 | 0.00 | 0.00 | 0.28 | 0.09 | 0.00 | 0.00 | 0.45 | 0.15 | 1.61 |
| Q22099 | krs-1 T02G5.9                          | 0.29 | 0.28 | 0.27 | 0.28 | 0.45 | 0.46 | 0.43 | 0.45 | 1.61 |
| O01833 | hil-5 B0414.3                          | 0.33 | 0.31 | 0.19 | 0.28 | 0.41 | 0.42 | 0.50 | 0.44 | 1.61 |
| Q22562 | CELE_T19B10.2 T19B10.2                 | 0.30 | 0.29 | 0.26 | 0.28 | 0.43 | 0.44 | 0.48 | 0.45 | 1.61 |
| P05690 | vit-2 C42D8.2                          | 0.26 | 0.27 | 0.27 | 0.27 | 0.43 | 0.44 | 0.44 | 0.44 | 1.61 |
| Q21219 | pept-1 cptb opt-2 pep-2 K04E7.2        | 0.00 | 0.48 | 0.00 | 0.16 | 0.00 | 0.77 | 0.00 | 0.26 | 1.61 |
| Q9N3H3 | CELE_Y53G8AL.2 Y53G8AL.2               | 0.27 | 0.00 | 0.29 | 0.19 | 0.46 | 0.00 | 0.45 | 0.30 | 1.61 |
| O44509 | CELE_F42G8.10 F42G8.10                 | 0.27 | 0.00 | 0.00 | 0.09 | 0.43 | 0.00 | 0.00 | 0.14 | 1.61 |
| Q94261 | cif-1 csn-7 eif-3.M K08F11.3           | 0.28 | 0.26 | 0.35 | 0.29 | 0.45 | 0.50 | 0.48 | 0.48 | 1.61 |
| O45418 | fkf-6 CELE_F31D4.3 F31D4.3             | 0.27 | 0.25 | 0.34 | 0.29 | 0.45 | 0.50 | 0.44 | 0.46 | 1.61 |
| H2LOQ1 | CELE_ZK6.11 ZK6.11                     | 0.30 | 0.29 | 0.29 | 0.29 | 0.45 | 0.49 | 0.48 | 0.47 | 1.61 |
| O01869 | rps-10 CELE_D1007.6 D1007.6            | 0.30 | 0.29 | 0.29 | 0.29 | 0.48 | 0.47 | 0.46 | 0.47 | 1.62 |
| G8JXY2 | mthf-1 C06A8.1                         | 0.31 | 0.31 | 0.30 | 0.30 | 0.47 | 0.50 | 0.51 | 0.49 | 1.62 |
| P18947 | vit-4 F59D8.2                          | 0.28 | 0.26 | 0.27 | 0.27 | 0.44 | 0.44 | 0.43 | 0.44 | 1.62 |
| P55326 | F13E6.1                                | 0.28 | 0.31 | 0.35 | 0.32 | 0.53 | 0.53 | 0.47 | 0.51 | 1.62 |
| Q17880 | nuo-1 C09H10.3 CELE_C09H10.3           | 0.27 | 0.26 | 0.29 | 0.27 | 0.45 | 0.44 | 0.44 | 0.44 | 1.62 |
| Q19416 | dylt-1 CELE_F13G3.4 F13G3.4            | 0.00 | 0.00 | 0.27 | 0.09 | 0.00 | 0.00 | 0.43 | 0.14 | 1.62 |
| Q18785 | mif-2 C52E4.2                          | 0.29 | 0.55 | 0.00 | 0.28 | 0.40 | 0.43 | 0.53 | 0.45 | 1.62 |
| Q93168 | C01G10.8 CELE_C01G10.8                 | 0.27 | 0.28 | 0.28 | 0.28 | 0.42 | 0.49 | 0.43 | 0.45 | 1.62 |
| Q09486 | C30G12.2 CELE_C30G12.2                 | 0.00 | 0.28 | 0.00 | 0.09 | 0.00 | 0.45 | 0.00 | 0.15 | 1.62 |
| G5EFZ1 | ipgm-1 F57B10.3                        | 0.30 | 0.29 | 0.30 | 0.30 | 0.46 | 0.47 | 0.52 | 0.48 | 1.62 |
| Q9XVS4 | dao-5 C25A1.10 CELE_C25A1.10           | 0.38 | 0.00 | 0.00 | 0.13 | 0.62 | 0.00 | 0.00 | 0.21 | 1.62 |
| Q20720 | CELE_F53F4.11 F53F4.11                 | 0.30 | 0.00 | 0.27 | 0.19 | 0.47 | 0.00 | 0.45 | 0.31 | 1.62 |
| G5EC10 | lec-9 C16H3.2 CELE_C16H3.2             | 0.00 | 0.28 | 0.28 | 0.19 | 0.00 | 0.46 | 0.46 | 0.31 | 1.63 |
| Q9GYT0 | ech-1.2 CELE_T08B2.7 T08B2.7           | 0.30 | 0.29 | 0.26 | 0.28 | 0.45 | 0.45 | 0.48 | 0.46 | 1.63 |
| P09446 | hsp-1 hsp70a F26D10.3                  | 0.28 | 0.27 | 0.28 | 0.28 | 0.46 | 0.45 | 0.45 | 0.45 | 1.63 |
| Q18040 | C16A3.10                               | 0.29 | 0.28 | 0.29 | 0.28 | 0.47 | 0.47 | 0.46 | 0.46 | 1.63 |
| O17694 | ril-1 C53A5.1 CELE_C53A5.1             | 0.00 | 0.28 | 0.00 | 0.09 | 0.00 | 0.45 | 0.00 | 0.15 | 1.63 |
| P47208 | cct-4 K01C8.10                         | 0.28 | 0.28 | 0.30 | 0.29 | 0.48 | 0.47 | 0.46 | 0.47 | 1.63 |
| P49596 | ppm-2 T23F11.1                         | 0.27 | 0.00 | 0.00 | 0.09 | 0.45 | 0.00 | 0.00 | 0.15 | 1.63 |
| O02640 | mdh-2 F20H11.3                         | 0.28 | 0.25 | 0.31 | 0.28 | 0.46 | 0.46 | 0.45 | 0.46 | 1.63 |

|        |                                 |      |      |      |      |      |      |      |      |      |
|--------|---------------------------------|------|------|------|------|------|------|------|------|------|
| Q9N358 | cct-8 Y55F3AR.3                 | 0.30 | 0.28 | 0.31 | 0.30 | 0.47 | 0.49 | 0.50 | 0.49 | 1.63 |
| G5EC23 | hcf-1 C46A5.9 CELE_C46A5.9      | 0.14 | 0.00 | 0.43 | 0.19 | 0.58 | 0.00 | 0.35 | 0.31 | 1.63 |
| Q10657 | tpi-1 Y17G7B.7                  | 0.29 | 0.29 | 0.29 | 0.29 | 0.48 | 0.46 | 0.46 | 0.47 | 1.63 |
| Q9XVE9 | rpl-14 C04F12.4 CELE_C04F12.4   | 0.28 | 0.27 | 0.28 | 0.27 | 0.45 | 0.45 | 0.45 | 0.45 | 1.63 |
| Q9NFI1 | hprt-1 CELE_Y105E8B.5 Y105E8B.5 | 0.31 | 0.30 | 0.32 | 0.31 | 0.52 | 0.55 | 0.46 | 0.51 | 1.63 |
| P49041 | rps-5 T05E11.1                  | 0.28 | 0.29 | 0.28 | 0.28 | 0.47 | 0.46 | 0.46 | 0.46 | 1.63 |
| P54812 | cdc-48.2 C41C4.8                | 0.29 | 0.30 | 0.28 | 0.29 | 0.50 | 0.47 | 0.45 | 0.48 | 1.64 |
| O44451 | pdhb-1 C04C3.3                  | 0.27 | 0.30 | 0.30 | 0.29 | 0.47 | 0.51 | 0.45 | 0.48 | 1.64 |
| Q86FL8 | spp-5 CELE_T08A9.9 T08A9.9      | 0.28 | 0.25 | 0.00 | 0.18 | 0.43 | 0.43 | 0.00 | 0.29 | 1.64 |
| Q19877 | rps-23 F28D1.7                  | 0.33 | 0.27 | 0.29 | 0.29 | 0.52 | 0.45 | 0.49 | 0.48 | 1.64 |
| P41956 | mev-1 cyt-1 T07C4.7             | 0.28 | 0.31 | 0.29 | 0.30 | 0.48 | 0.53 | 0.45 | 0.49 | 1.64 |
| Q20122 | CELE_F37C12.3 F37C12.3          | 0.26 | 0.00 | 0.00 | 0.09 | 0.43 | 0.00 | 0.00 | 0.14 | 1.64 |
| Q09444 | ubh-4 C08B11.7                  | 0.31 | 0.00 | 0.22 | 0.18 | 0.46 | 0.00 | 0.41 | 0.29 | 1.64 |
| G5EE04 | hip-1 CELE_T12D8.8 T12D8.8      | 0.28 | 0.34 | 0.29 | 0.31 | 0.49 | 0.52 | 0.50 | 0.50 | 1.64 |
| G5EDE8 | ile-1 CELE_K07A1.8 K07A1.8      | 0.29 | 0.00 | 0.00 | 0.10 | 0.48 | 0.00 | 0.00 | 0.16 | 1.64 |
| P47991 | rpl-6 R151.3                    | 0.28 | 0.28 | 0.29 | 0.28 | 0.47 | 0.46 | 0.46 | 0.46 | 1.64 |
| Q21898 | vha-1 R10E11.8                  | 0.28 | 0.00 | 0.00 | 0.09 | 0.47 | 0.00 | 0.00 | 0.16 | 1.64 |
| H2KZL7 | prdx-2 CELE_F09E5.15 F09E5.15   | 0.26 | 0.29 | 0.29 | 0.28 | 0.44 | 0.48 | 0.45 | 0.46 | 1.65 |
| Q17994 | got-2.2 C14F11.1 CELE_C14F11.1  | 0.28 | 0.29 | 0.29 | 0.29 | 0.49 | 0.48 | 0.46 | 0.48 | 1.65 |
| G5EF14 | lec-5 CELE_ZK1248.16 ZK1248.16  | 0.27 | 0.25 | 0.31 | 0.28 | 0.47 | 0.46 | 0.45 | 0.46 | 1.65 |
| Q9GRY9 | CELE_Y59A8B.10 Y59A8B.10        | 0.00 | 0.36 | 0.32 | 0.23 | 0.00 | 0.44 | 0.68 | 0.37 | 1.65 |
| P49405 | rpl-5 F54C9.5                   | 0.29 | 0.28 | 0.29 | 0.29 | 0.46 | 0.47 | 0.49 | 0.47 | 1.65 |
| Q4TT88 | pam-1 CELE_F49E8.3 F49E8.3      | 0.28 | 0.29 | 0.30 | 0.29 | 0.51 | 0.45 | 0.48 | 0.48 | 1.65 |
| G4SLH0 | ttn-1 W06H8.8                   | 0.28 | 0.30 | 0.26 | 0.28 | 0.46 | 0.45 | 0.47 | 0.46 | 1.65 |
| Q20819 | tsfm-1 F55C5.5                  | 0.00 | 0.00 | 0.27 | 0.09 | 0.00 | 0.00 | 0.44 | 0.15 | 1.66 |
| P40614 | F01G4.6                         | 0.28 | 0.28 | 0.28 | 0.28 | 0.47 | 0.47 | 0.46 | 0.46 | 1.66 |
| Q22799 | dlc-1 T26A5.9                   | 0.28 | 0.29 | 0.28 | 0.28 | 0.47 | 0.47 | 0.46 | 0.47 | 1.66 |
| Q95ZS5 | CELE_F56A8.3 F56A8.3            | 0.28 | 0.30 | 0.27 | 0.28 | 0.45 | 0.49 | 0.46 | 0.47 | 1.66 |
| A7LPE6 | gpdh-2 CELE_K11H3.1 K11H3.1     | 0.00 | 0.27 | 0.00 | 0.09 | 0.00 | 0.44 | 0.00 | 0.15 | 1.66 |
| Q9U2A8 | rpl-43 rpl-37a Y48B6A.2         | 0.25 | 0.27 | 0.28 | 0.26 | 0.44 | 0.44 | 0.43 | 0.44 | 1.66 |
| Q23312 | rps-7 ZC434.2                   | 0.28 | 0.26 | 0.29 | 0.28 | 0.46 | 0.46 | 0.46 | 0.46 | 1.66 |
| Q27488 | pas-2 D1054.2                   | 0.28 | 0.00 | 0.27 | 0.18 | 0.48 | 0.00 | 0.45 | 0.31 | 1.66 |
| P34574 | chc-1 T20G5.1                   | 0.27 | 0.35 | 0.29 | 0.31 | 0.52 | 0.45 | 0.56 | 0.51 | 1.66 |
| Q10121 | C23G10.2                        | 0.29 | 0.28 | 0.27 | 0.28 | 0.46 | 0.46 | 0.48 | 0.47 | 1.66 |
| O44411 | nog-1 T07A9.9                   | 0.00 | 0.29 | 0.00 | 0.10 | 0.00 | 0.48 | 0.00 | 0.16 | 1.66 |
| P48154 | rps-1 F56F3.5                   | 0.28 | 0.28 | 0.28 | 0.28 | 0.47 | 0.47 | 0.46 | 0.46 | 1.67 |
| O45525 | CELE_F45H10.2 F45H10.2          | 0.27 | 0.28 | 0.28 | 0.28 | 0.46 | 0.45 | 0.48 | 0.46 | 1.67 |
| Q20865 | CELE_F56C9.7 F56C9.7            | 0.31 | 0.32 | 0.30 | 0.31 | 0.48 | 0.62 | 0.44 | 0.51 | 1.67 |
| Q17770 | pdi-2 C07A12.4                  | 0.28 | 0.27 | 0.29 | 0.28 | 0.47 | 0.47 | 0.47 | 0.47 | 1.67 |
| G5EB10 | 4D656 CELE_Y54G2A.18 Y54G2A.18  | 0.30 | 0.27 | 0.26 | 0.28 | 0.48 | 0.47 | 0.44 | 0.46 | 1.67 |
| P91133 | ubr-1 C32E8.11                  | 0.22 | 0.00 | 0.00 | 0.07 | 0.37 | 0.00 | 0.00 | 0.12 | 1.67 |
| Q23050 | clik-1 CELE_T25F10.6 T25F10.6   | 0.28 | 0.26 | 0.29 | 0.27 | 0.45 | 0.46 | 0.45 | 0.46 | 1.67 |
| O18687 | CELE_F26E4.6 F26E4.6            | 0.28 | 0.00 | 0.00 | 0.09 | 0.46 | 0.00 | 0.00 | 0.15 | 1.67 |
| O16259 | sti-1 R09E12.3                  | 0.28 | 0.29 | 0.29 | 0.29 | 0.48 | 0.49 | 0.46 | 0.48 | 1.67 |
| G5EC98 | ctps-1 CELE_W06H3.3 W06H3.3     | 0.00 | 0.27 | 0.28 | 0.18 | 0.00 | 0.46 | 0.46 | 0.31 | 1.67 |
| P43509 | cpr-5 W07B8.5                   | 0.30 | 0.28 | 0.24 | 0.27 | 0.39 | 0.46 | 0.53 | 0.46 | 1.67 |
| P46562 | alh-9 F01F1.6                   | 0.28 | 0.28 | 0.28 | 0.28 | 0.45 | 0.47 | 0.46 | 0.46 | 1.68 |
| Q9TZQ3 | pgl-1 ZK381.4                   | 0.26 | 0.28 | 0.30 | 0.28 | 0.47 | 0.47 | 0.47 | 0.47 | 1.68 |
| Q18066 | dim-1 C18A11.7/C18A11.8         | 0.28 | 0.29 | 0.29 | 0.29 | 0.47 | 0.49 | 0.47 | 0.48 | 1.68 |
| O17953 | dld-1 LLC1.3                    | 0.28 | 0.29 | 0.28 | 0.28 | 0.46 | 0.49 | 0.48 | 0.47 | 1.68 |

|        |                                   |      |      |      |      |      |      |      |      |      |
|--------|-----------------------------------|------|------|------|------|------|------|------|------|------|
| P50305 | sams-3 C06E7.1                    | 0.28 | 0.28 | 0.28 | 0.28 | 0.47 | 0.47 | 0.47 | 0.47 | 1.68 |
| Q18115 | rpn-2 C23G10.4                    | 0.27 | 0.29 | 0.32 | 0.30 | 0.54 | 0.48 | 0.47 | 0.50 | 1.68 |
| O02056 | rpl-4 B0041.4                     | 0.30 | 0.28 | 0.26 | 0.28 | 0.47 | 0.47 | 0.47 | 0.47 | 1.68 |
| O18236 | nuo-3 CELE_Y57G11C.12 Y57G11C.12  | 0.28 | 0.29 | 0.27 | 0.28 | 0.46 | 0.48 | 0.48 | 0.47 | 1.68 |
| Q9BL19 | rpl-17 Y48G8AL.8                  | 0.28 | 0.26 | 0.27 | 0.27 | 0.44 | 0.45 | 0.46 | 0.45 | 1.69 |
| Q20219 | irg-7 drd-2 CELE_F40F4.6 F40F4.6  | 0.27 | 0.28 | 0.29 | 0.28 | 0.46 | 0.47 | 0.48 | 0.47 | 1.69 |
| Q9XW16 | pfu-1 Y18D10A.20                  | 0.30 | 0.30 | 0.29 | 0.30 | 0.47 | 0.41 | 0.64 | 0.50 | 1.69 |
| Q22053 | fib-1 T01C3.7                     | 0.26 | 0.28 | 0.28 | 0.28 | 0.51 | 0.45 | 0.44 | 0.46 | 1.69 |
| Q09607 | gst-36 R07B1.4                    | 0.29 | 0.00 | 0.29 | 0.19 | 0.48 | 0.00 | 0.50 | 0.33 | 1.69 |
| Q45934 | CELE_Y43F4B.5 Y43F4B.5            | 0.29 | 0.00 | 0.00 | 0.10 | 0.50 | 0.00 | 0.00 | 0.17 | 1.69 |
| Q22054 | rps-16 T01C3.6                    | 0.29 | 0.30 | 0.27 | 0.28 | 0.46 | 0.48 | 0.50 | 0.48 | 1.69 |
| Q93235 | nkb-1 C17E4.9                     | 0.29 | 0.28 | 0.35 | 0.31 | 0.46 | 0.47 | 0.63 | 0.52 | 1.69 |
| G5EF37 | pat-10 tnc-1 CELE_F54C1.7 F54C1.7 | 0.28 | 0.45 | 0.29 | 0.34 | 0.53 | 0.61 | 0.57 | 0.57 | 1.69 |
| O76371 | rpt-5 CELE_F56H1.4 F56H1.4        | 0.40 | 0.28 | 0.29 | 0.32 | 0.61 | 0.46 | 0.58 | 0.55 | 1.69 |
| P54688 | bcat-1 eca-39 eca39 K02A4.1       | 0.29 | 0.26 | 0.30 | 0.28 | 0.46 | 0.47 | 0.52 | 0.48 | 1.70 |
| O01925 | mboa-6 R155.1                     | 0.00 | 0.30 | 0.00 | 0.10 | 0.00 | 0.51 | 0.00 | 0.17 | 1.70 |
| Q11067 | tag-320 B0403.4                   | 0.29 | 0.28 | 0.27 | 0.28 | 0.47 | 0.49 | 0.47 | 0.48 | 1.70 |
| P90921 | asg-1 K07A12.3                    | 0.00 | 0.26 | 0.00 | 0.09 | 0.00 | 0.43 | 0.00 | 0.14 | 1.70 |
| Q9N3D0 | CELE_Y54E10BR.5 Y54E10BR.5        | 0.00 | 0.00 | 0.27 | 0.09 | 0.00 | 0.00 | 0.46 | 0.15 | 1.70 |
| Q21276 | K07C5.4                           | 0.29 | 0.26 | 0.28 | 0.28 | 0.46 | 0.49 | 0.46 | 0.47 | 1.70 |
| Q9N4X8 | gst-10 Y45G12C.2                  | 0.30 | 0.31 | 0.27 | 0.29 | 0.50 | 0.47 | 0.52 | 0.50 | 1.70 |
| P48158 | rpl-23 B0336.10                   | 0.32 | 0.26 | 0.25 | 0.28 | 0.46 | 0.45 | 0.50 | 0.47 | 1.71 |
| Q19102 | ard-1 CELE_F01G4.2 F01G4.2        | 0.28 | 0.29 | 0.25 | 0.27 | 0.51 | 0.47 | 0.43 | 0.47 | 1.71 |
| Q22067 | got-1.2 T01C8.5                   | 0.00 | 0.28 | 0.32 | 0.20 | 0.00 | 0.52 | 0.50 | 0.34 | 1.71 |
| P91249 | col-20 CELE_F11G11.11 F11G11.11   | 0.26 | 0.00 | 0.28 | 0.18 | 0.46 | 0.00 | 0.47 | 0.31 | 1.71 |
| Q86LS4 | dao-2 CELE_M03A1.7 M03A1.7        | 0.00 | 0.27 | 0.25 | 0.17 | 0.00 | 0.41 | 0.49 | 0.30 | 1.71 |
| Q18359 | C33A12.1                          | 0.25 | 0.28 | 0.24 | 0.26 | 0.45 | 0.43 | 0.46 | 0.44 | 1.71 |
| P34528 | K12H4.7                           | 0.30 | 0.29 | 0.23 | 0.27 | 0.49 | 0.40 | 0.51 | 0.47 | 1.71 |
| Q86MI3 | CELE_Y71H10B.1 Y71H10B.1          | 0.29 | 0.00 | 0.31 | 0.20 | 0.50 | 0.00 | 0.52 | 0.34 | 1.72 |
| Q9N3T5 | spg-7 CELE_Y47G6A.10 Y47G6A.10    | 0.30 | 0.24 | 0.00 | 0.18 | 0.45 | 0.47 | 0.00 | 0.31 | 1.72 |
| Q18786 | snr-4 C52E4.3                     | 0.28 | 0.00 | 0.00 | 0.09 | 0.48 | 0.00 | 0.00 | 0.16 | 1.72 |
| P41988 | cct-1 tcp-1 T05C12.7              | 0.29 | 0.27 | 0.25 | 0.27 | 0.47 | 0.45 | 0.47 | 0.47 | 1.72 |
| Q17405 | AC3.5                             | 0.00 | 0.30 | 0.00 | 0.10 | 0.00 | 0.51 | 0.00 | 0.17 | 1.73 |
| Q19973 | cec-5 CELE_F32E10.6 F32E10.6      | 0.26 | 0.00 | 0.00 | 0.09 | 0.44 | 0.00 | 0.00 | 0.15 | 1.73 |
| P34629 | lap-1 ZK353.6                     | 0.22 | 0.00 | 0.00 | 0.07 | 0.38 | 0.00 | 0.00 | 0.13 | 1.73 |
| O16785 | pat-6 T21D12.4                    | 0.00 | 0.00 | 0.26 | 0.09 | 0.00 | 0.00 | 0.46 | 0.15 | 1.73 |
| Q9XUB7 | far-6 CELE_W02A2.2 W02A2.2        | 0.26 | 0.26 | 0.30 | 0.27 | 0.46 | 0.45 | 0.48 | 0.47 | 1.73 |
| Q9XVF7 | rpl-8 rpl-2 B0250.1               | 0.28 | 0.27 | 0.28 | 0.28 | 0.49 | 0.46 | 0.48 | 0.48 | 1.73 |
| G5EBK3 | erm-1 C01G8.5 CELE_C01G8.5        | 0.23 | 0.32 | 0.30 | 0.28 | 0.53 | 0.49 | 0.45 | 0.49 | 1.73 |
| H2FLL1 | lea-1 CELE_K08H10.1 K08H10.1      | 0.30 | 0.28 | 0.27 | 0.28 | 0.50 | 0.47 | 0.50 | 0.49 | 1.73 |
| Q6A8K1 | act-4 CELE_M03F4.2 M03F4.2        | 0.23 | 0.29 | 0.26 | 0.26 | 0.46 | 0.43 | 0.46 | 0.45 | 1.73 |
| Q93791 | nid-1 CELE_F54F3.1 F54F3.1        | 0.24 | 0.00 | 0.00 | 0.08 | 0.41 | 0.00 | 0.00 | 0.14 | 1.73 |
| O44887 | inx-13 inx CELE_Y8G1A.2 Y8G1A.2   | 0.24 | 0.00 | 0.00 | 0.08 | 0.42 | 0.00 | 0.00 | 0.14 | 1.73 |
| Q9U1W1 | tfg-1 CELE_Y63D3A.5 Y63D3A.5      | 0.26 | 0.27 | 0.30 | 0.27 | 0.50 | 0.47 | 0.46 | 0.48 | 1.73 |
| G5ECC3 | rme-1 CELE_W06H8.1 W06H8.1        | 0.00 | 0.36 | 0.00 | 0.12 | 0.00 | 0.63 | 0.00 | 0.21 | 1.74 |
| O18178 | pptr-1 W08G11.4                   | 0.30 | 0.00 | 0.35 | 0.22 | 0.55 | 0.00 | 0.57 | 0.37 | 1.74 |
| Q09249 | C16C10.3                          | 0.00 | 0.00 | 0.27 | 0.09 | 0.00 | 0.00 | 0.47 | 0.16 | 1.74 |
| O02328 | eif-3.C T23D8.4                   | 0.24 | 0.30 | 0.28 | 0.27 | 0.50 | 0.44 | 0.49 | 0.47 | 1.74 |

|        |                                                                                                                                                                                                                                                                   |      |      |      |      |      |      |      |      |      |
|--------|-------------------------------------------------------------------------------------------------------------------------------------------------------------------------------------------------------------------------------------------------------------------|------|------|------|------|------|------|------|------|------|
| P62784 | his-1 T10C6.14; his-5 F45F2.3; his-10 ZK131.4; his-14 ZK131.8; his-18 K06C4.10; his-26 ZK131.1; his-28 K06C4.2; his-31 F17E9.12; his-37 C50F4.7; his-38 K03A1.6; his-46 B0035.9; his-50 F07B7.9; his-56 F54E12.3; his-60 F55G1.11; his-64 F22B3.1; his-67 T23D8.5 | 0.29 | 0.26 | 0.28 | 0.27 | 0.48 | 0.48 | 0.48 | 0.48 | 1.74 |
| Q9N350 | CELE_Y55F3BR.6 Y55F3BR.6                                                                                                                                                                                                                                          | 0.24 | 0.32 | 0.25 | 0.27 | 0.48 | 0.45 | 0.47 | 0.47 | 1.74 |
| G5EFL5 | alp-1 CELE_T11B7.4 T11B7.4                                                                                                                                                                                                                                        | 0.00 | 0.27 | 0.35 | 0.21 | 0.00 | 0.57 | 0.52 | 0.36 | 1.75 |
| Q96618 | pbs-1 CELE_K08D12.1 K08D12.1                                                                                                                                                                                                                                      | 0.25 | 0.24 | 0.31 | 0.27 | 0.49 | 0.46 | 0.45 | 0.47 | 1.75 |
| Q10943 | arf-1.2 arf-1 B0336.2                                                                                                                                                                                                                                             | 0.29 | 0.28 | 0.26 | 0.28 | 0.47 | 0.48 | 0.50 | 0.48 | 1.75 |
| Q9N4Y8 | nuo-5 CELE_Y45G12B.1 Y45G12B.1                                                                                                                                                                                                                                    | 0.29 | 0.22 | 0.32 | 0.28 | 0.47 | 0.53 | 0.44 | 0.48 | 1.75 |
| Q95Y72 | dss-1 Y119D3B.15                                                                                                                                                                                                                                                  | 0.00 | 0.00 | 0.30 | 0.10 | 0.00 | 0.00 | 0.52 | 0.17 | 1.75 |
| O16520 | erfa-1 etf-1 T05H4.6                                                                                                                                                                                                                                              | 0.00 | 0.00 | 0.36 | 0.12 | 0.00 | 0.00 | 0.64 | 0.21 | 1.75 |
| P46550 | cct-6 F01F1.8                                                                                                                                                                                                                                                     | 0.27 | 0.27 | 0.27 | 0.27 | 0.48 | 0.46 | 0.48 | 0.48 | 1.76 |
| P18334 | kin-3 B0205.7                                                                                                                                                                                                                                                     | 0.26 | 0.26 | 0.28 | 0.27 | 0.48 | 0.47 | 0.45 | 0.47 | 1.76 |
| P52872 | dad-1 F57B10.10                                                                                                                                                                                                                                                   | 0.00 | 0.28 | 0.00 | 0.09 | 0.00 | 0.48 | 0.00 | 0.16 | 1.76 |
| Q20641 | nmy-1 CELE_F52B10.1 F52B10.1                                                                                                                                                                                                                                      | 0.28 | 0.00 | 0.27 | 0.18 | 0.45 | 0.00 | 0.51 | 0.32 | 1.76 |
| Q21888 | CELE_R102.2 R102.2                                                                                                                                                                                                                                                | 0.00 | 0.24 | 0.00 | 0.08 | 0.00 | 0.42 | 0.00 | 0.14 | 1.76 |
| Q20034 | CELE_F35D11.4 F35D11.4                                                                                                                                                                                                                                            | 0.23 | 0.00 | 0.31 | 0.18 | 0.48 | 0.00 | 0.48 | 0.32 | 1.76 |
| Q20751 | iff-2 F54C9.1                                                                                                                                                                                                                                                     | 0.25 | 0.28 | 0.29 | 0.27 | 0.54 | 0.47 | 0.45 | 0.48 | 1.77 |
| P47209 | cct-5 C07G2.3                                                                                                                                                                                                                                                     | 0.26 | 0.30 | 0.28 | 0.28 | 0.51 | 0.48 | 0.50 | 0.50 | 1.77 |
| Q27511 | htz-1 R08C7.3                                                                                                                                                                                                                                                     | 0.00 | 0.30 | 0.00 | 0.10 | 0.00 | 0.52 | 0.00 | 0.17 | 1.77 |
| O45181 | CELE_K07H8.10 K07H8.10                                                                                                                                                                                                                                            | 0.21 | 0.28 | 0.29 | 0.26 | 0.52 | 0.43 | 0.44 | 0.46 | 1.77 |
| O62106 | eif-6 C47B2.5                                                                                                                                                                                                                                                     | 0.27 | 0.22 | 0.00 | 0.16 | 0.40 | 0.47 | 0.00 | 0.29 | 1.77 |
| Q9XWJ5 | CELE_Y51H1A.3 Y51H1A.3                                                                                                                                                                                                                                            | 0.26 | 0.00 | 0.27 | 0.18 | 0.47 | 0.00 | 0.46 | 0.31 | 1.78 |
| G4SF79 | CELE_F25E2.2 F25E2.2                                                                                                                                                                                                                                              | 0.00 | 0.00 | 0.26 | 0.09 | 0.00 | 0.00 | 0.47 | 0.16 | 1.78 |
| P34652 | cnx-1 ZK632.6                                                                                                                                                                                                                                                     | 0.27 | 0.24 | 0.39 | 0.30 | 0.54 | 0.46 | 0.61 | 0.54 | 1.78 |
| Q9BMU4 | atln-1 4D561 CELE_Y54G2A.2 Y54G2A.2                                                                                                                                                                                                                               | 0.00 | 0.36 | 0.00 | 0.12 | 0.00 | 0.64 | 0.00 | 0.21 | 1.79 |
| Q1XFY9 | rps-24 CELE_T07A9.11 T07A9.11                                                                                                                                                                                                                                     | 0.26 | 0.30 | 0.29 | 0.28 | 0.57 | 0.47 | 0.47 | 0.51 | 1.79 |
| A3QMC5 | rpl-34 C42C1.14 CELE_C42C1.14                                                                                                                                                                                                                                     | 0.25 | 0.24 | 0.28 | 0.26 | 0.47 | 0.47 | 0.45 | 0.46 | 1.80 |
| Q09456 | col-80 C09G5.5                                                                                                                                                                                                                                                    | 0.26 | 0.23 | 0.00 | 0.16 | 0.44 | 0.45 | 0.00 | 0.30 | 1.80 |
| Q9U3Q6 | ugt-22 C08F11.8 CELE_C08F11.8                                                                                                                                                                                                                                     | 0.00 | 0.00 | 0.24 | 0.08 | 0.00 | 0.00 | 0.43 | 0.14 | 1.80 |
| Q22253 | rpn-9 CELE_T06D8.8 T06D8.8                                                                                                                                                                                                                                        | 0.27 | 0.00 | 0.00 | 0.09 | 0.48 | 0.00 | 0.00 | 0.16 | 1.80 |
| G5EDI2 | ret-1 CELE_W06A7.3 W06A7.3                                                                                                                                                                                                                                        | 0.27 | 0.25 | 0.29 | 0.27 | 0.47 | 0.50 | 0.50 | 0.49 | 1.80 |
| P17140 | <b>let-2 clb-1 F01G12.5</b>                                                                                                                                                                                                                                       | 0.24 | 0.00 | 0.26 | 0.17 | 0.45 | 0.00 | 0.45 | 0.30 | 1.80 |
| Q11117 | lmp-1 C03B1.12                                                                                                                                                                                                                                                    | 0.00 | 0.00 | 0.29 | 0.10 | 0.00 | 0.00 | 0.52 | 0.17 | 1.80 |
| P52821 | rps-25 K02B2.5                                                                                                                                                                                                                                                    | 0.29 | 0.25 | 0.25 | 0.26 | 0.47 | 0.47 | 0.48 | 0.47 | 1.81 |
| Q06561 | unc-52 ZC101.2                                                                                                                                                                                                                                                    | 0.24 | 0.29 | 0.24 | 0.25 | 0.49 | 0.46 | 0.44 | 0.46 | 1.81 |
| O61742 | rpn-10 B0205.3                                                                                                                                                                                                                                                    | 0.00 | 0.00 | 0.27 | 0.09 | 0.00 | 0.00 | 0.49 | 0.16 | 1.81 |
| Q9XUV0 | pbs-5 CELE_K05C4.1 K05C4.1                                                                                                                                                                                                                                        | 0.23 | 0.29 | 0.29 | 0.27 | 0.55 | 0.50 | 0.42 | 0.49 | 1.81 |
| G5EDQ2 | hmg-12 hmg-I-beta CELE_Y17G7A.1 Y17G7A.1                                                                                                                                                                                                                          | 0.25 | 0.25 | 0.28 | 0.26 | 0.50 | 0.46 | 0.47 | 0.48 | 1.82 |
| P91017 | hpo-32 C01G8.6 CELE_C01G8.6                                                                                                                                                                                                                                       | 0.31 | 0.00 | 0.32 | 0.21 | 0.48 | 0.00 | 0.68 | 0.38 | 1.82 |
| Q09510 | mlc-4 C56G7.1                                                                                                                                                                                                                                                     | 0.25 | 0.00 | 0.00 | 0.08 | 0.46 | 0.00 | 0.00 | 0.15 | 1.82 |
| Q8TA47 | CELE_Y51F10.7 Y51F10.7                                                                                                                                                                                                                                            | 0.00 | 0.00 | 0.35 | 0.12 | 0.00 | 0.00 | 0.65 | 0.22 | 1.82 |
| P53703 | cchl-1 T06D8.6                                                                                                                                                                                                                                                    | 0.22 | 0.00 | 0.00 | 0.07 | 0.40 | 0.00 | 0.00 | 0.13 | 1.83 |
| Q9N362 | CELE_Y55F3AM.13 Y55F3AM.13                                                                                                                                                                                                                                        | 0.29 | 0.28 | 0.00 | 0.19 | 0.57 | 0.46 | 0.00 | 0.34 | 1.83 |
| O44782 | vpr-1 CELE_F33D11.11 F33D11.11                                                                                                                                                                                                                                    | 0.00 | 0.20 | 0.00 | 0.07 | 0.00 | 0.37 | 0.00 | 0.12 | 1.83 |
| Q19437 | upb-1 CELE_F13H8.7 F13H8.7                                                                                                                                                                                                                                        | 0.00 | 0.21 | 0.27 | 0.16 | 0.00 | 0.45 | 0.42 | 0.29 | 1.83 |
| Q19162 | rpl-11.2 F07D10.1                                                                                                                                                                                                                                                 | 0.28 | 0.25 | 0.26 | 0.26 | 0.49 | 0.49 | 0.47 | 0.48 | 1.84 |
| Q23058 | ssp-9 E03H12.10; ssp-11 T28H11.6                                                                                                                                                                                                                                  | 0.25 | 0.21 | 0.28 | 0.25 | 0.45 | 0.48 | 0.44 | 0.46 | 1.84 |
| Q95Y29 | CELE_Y34B4A.6 Y34B4A.6                                                                                                                                                                                                                                            | 0.28 | 0.26 | 0.21 | 0.25 | 0.44 | 0.47 | 0.48 | 0.46 | 1.84 |
| Q8MQC6 | cpr-6 C25B8.3 CELE_C25B8.3                                                                                                                                                                                                                                        | 0.27 | 0.27 | 0.27 | 0.27 | 0.52 | 0.46 | 0.51 | 0.50 | 1.85 |



|        |                                     |      |      |      |      |      |      |      |      |      |
|--------|-------------------------------------|------|------|------|------|------|------|------|------|------|
| Q9TXP0 | rps-27 F56E10.4                     | 0.28 | 0.25 | 0.26 | 0.26 | 0.49 | 0.49 | 0.47 | 0.48 | 1.85 |
| Q9XWD1 | acs-5 CELE_Y76A2B.3 Y76A2B.3        | 0.26 | 0.25 | 0.00 | 0.17 | 0.48 | 0.47 | 0.00 | 0.32 | 1.85 |
| Q45502 | dnj-12 CELE_F39B2.10 F39B2.10       | 0.31 | 0.00 | 0.29 | 0.20 | 0.60 | 0.00 | 0.51 | 0.37 | 1.85 |
| Q21086 | nst-1 K01C8.9                       | 0.00 | 0.21 | 0.00 | 0.07 | 0.00 | 0.38 | 0.00 | 0.13 | 1.85 |
| Q2PJ97 | CELE_F52E1.14 F52E1.14              | 0.26 | 0.27 | 0.21 | 0.25 | 0.46 | 0.43 | 0.49 | 0.46 | 1.86 |
| Q18947 | ule-3 CELE_D1054.11 D1054.11        | 0.00 | 0.00 | 0.17 | 0.06 | 0.00 | 0.00 | 0.31 | 0.10 | 1.86 |
| P36609 | ncs-2 F10G8.5                       | 0.29 | 0.32 | 0.28 | 0.30 | 0.56 | 0.49 | 0.59 | 0.55 | 1.86 |
| Q6AHR3 | CELE_R151.2 R151.2                  | 0.19 | 0.31 | 0.26 | 0.25 | 0.49 | 0.46 | 0.45 | 0.47 | 1.86 |
| Q09657 | CELE_ZK1320.9 ZK1320.9              | 0.00 | 0.25 | 0.00 | 0.08 | 0.00 | 0.47 | 0.00 | 0.16 | 1.87 |
| Q967F1 | eif-1 CELE_T27F7.3 T27F7.3          | 0.26 | 0.00 | 0.25 | 0.17 | 0.53 | 0.00 | 0.43 | 0.32 | 1.87 |
| P45971 | ostb-1 T09A5.11                     | 0.00 | 0.26 | 0.00 | 0.09 | 0.00 | 0.49 | 0.00 | 0.16 | 1.87 |
| Q21966 | asp-4 CELE_R12H7.2 R12H7.2          | 0.29 | 0.23 | 0.27 | 0.26 | 0.48 | 0.50 | 0.49 | 0.49 | 1.88 |
| Q9XUY5 | nkb-3 F55F3.3                       | 0.25 | 0.28 | 0.31 | 0.28 | 0.54 | 0.48 | 0.56 | 0.52 | 1.88 |
| Q9BKQ9 | cisd-3.2 CELE_Y67D2.3 Y67D2.3       | 0.33 | 0.31 | 0.24 | 0.29 | 0.68 | 0.48 | 0.48 | 0.54 | 1.88 |
| Q564Q1 | gale-1 C47B2.6 CELE_C47B2.6         | 0.24 | 0.00 | 0.23 | 0.16 | 0.44 | 0.00 | 0.45 | 0.30 | 1.90 |
| O17570 | rpl-38 C06B8.8                      | 0.18 | 0.26 | 0.36 | 0.27 | 0.56 | 0.47 | 0.50 | 0.51 | 1.90 |
| Q8MXI1 | ucr-11 CELE_F57B10.14 F57B10.14     | 0.27 | 0.21 | 0.28 | 0.25 | 0.49 | 0.49 | 0.47 | 0.48 | 1.91 |
| Q9XWL1 | ttr-17 CELE_Y5F2A.2 Y5F2A.2         | 0.55 | 0.00 | 0.24 | 0.26 | 0.44 | 0.61 | 0.44 | 0.50 | 1.91 |
| O01685 | C32F10.8 CELE_C32F10.8              | 0.26 | 0.00 | 0.25 | 0.17 | 0.49 | 0.00 | 0.47 | 0.32 | 1.92 |
| P55216 | cth-2 ZK1127.10                     | 0.25 | 0.32 | 0.24 | 0.27 | 0.51 | 0.46 | 0.62 | 0.53 | 1.93 |
| C6KRN1 | sao-1 R10D12.14                     | 0.26 | 0.27 | 0.26 | 0.26 | 0.50 | 0.49 | 0.53 | 0.51 | 1.93 |
| Q23571 | dbt-1 ZK669.4                       | 0.25 | 0.25 | 0.23 | 0.24 | 0.49 | 0.44 | 0.47 | 0.46 | 1.93 |
| Q21568 | M28.5                               | 0.23 | 0.24 | 0.26 | 0.24 | 0.48 | 0.46 | 0.47 | 0.47 | 1.93 |
| O17954 | CELE_LLC1.2 LLC1.2                  | 0.00 | 0.22 | 0.00 | 0.07 | 0.00 | 0.43 | 0.00 | 0.14 | 1.94 |
| O45106 | ech-5 CELE_F56B3.5 F56B3.5          | 0.00 | 0.27 | 0.26 | 0.18 | 0.00 | 0.45 | 0.57 | 0.34 | 1.94 |
| Q17348 | snr-1 Y116A8C.42                    | 0.24 | 0.25 | 0.24 | 0.24 | 0.49 | 0.48 | 0.46 | 0.47 | 1.94 |
| Q65Z17 | C32D5.8 CELE_C32D5.8                | 0.26 | 0.00 | 0.24 | 0.17 | 0.46 | 0.00 | 0.51 | 0.33 | 1.94 |
| Q23635 | CELE_ZK84.1 ZK84.1                  | 0.00 | 0.00 | 0.23 | 0.08 | 0.00 | 0.00 | 0.45 | 0.15 | 1.95 |
| Q9U2K8 | abce-1 CELE_Y39E4B.1 Y39E4B.1       | 0.30 | 0.24 | 0.23 | 0.26 | 0.48 | 0.54 | 0.48 | 0.50 | 1.95 |
| Q6AW03 | CELE_Y37E3.17 Y37E3.17              | 0.32 | 0.24 | 0.33 | 0.29 | 0.67 | 0.40 | 0.66 | 0.57 | 1.95 |
| Q9U238 | trap-4 CELE_Y56A3A.21 Y56A3A.21     | 0.25 | 0.24 | 0.26 | 0.25 | 0.51 | 0.49 | 0.48 | 0.49 | 1.97 |
| P19626 | mle-2 C36E6.5                       | 0.24 | 0.26 | 0.27 | 0.26 | 0.52 | 0.51 | 0.49 | 0.51 | 1.99 |
| P34714 | ost-1 sparC C44B12.2                | 0.28 | 0.23 | 0.00 | 0.17 | 0.53 | 0.49 | 0.00 | 0.34 | 2.00 |
| G5EDY2 | wars-1 wrs-1 CELE_Y80D3A.1 Y80D3A.1 | 0.18 | 0.20 | 0.20 | 0.19 | 0.39 | 0.40 | 0.38 | 0.39 | 2.03 |
| O61792 | rpn-8 CELE_R12E2.3 R12E2.3          | 0.00 | 0.27 | 0.30 | 0.19 | 0.00 | 0.64 | 0.51 | 0.38 | 2.04 |
| O16521 | hpo-19 CELE_T05H4.5 T05H4.5         | 0.26 | 0.00 | 0.00 | 0.09 | 0.54 | 0.00 | 0.00 | 0.18 | 2.06 |
| P90789 | D2030.4                             | 0.00 | 0.21 | 0.21 | 0.14 | 0.00 | 0.44 | 0.46 | 0.30 | 2.13 |
| A8WHP8 | plin-1 mdt-28 CELE_W01A8.1 W01A8.1  | 0.00 | 0.23 | 0.00 | 0.08 | 0.00 | 0.49 | 0.00 | 0.16 | 2.13 |
| Q20589 | CELE_F49C12.12 F49C12.12            | 0.00 | 0.21 | 0.00 | 0.07 | 0.00 | 0.45 | 0.00 | 0.15 | 2.15 |
| O18180 | mrpl-12 CELE_W09D10.3 W09D10.3      | 0.27 | 0.27 | 0.18 | 0.24 | 0.54 | 0.49 | 0.53 | 0.52 | 2.15 |
| Q09236 | copd-1 C13B9.3                      | 0.28 | 0.24 | 0.00 | 0.17 | 0.72 | 0.40 | 0.00 | 0.37 | 2.15 |
| Q03206 | ced-10 rac-1 C09G12.8               | 0.26 | 0.22 | 0.00 | 0.16 | 0.52 | 0.52 | 0.00 | 0.35 | 2.17 |
| O44781 | CELE_F33D11.10 F33D11.10            | 0.00 | 0.33 | 0.29 | 0.21 | 0.60 | 0.38 | 0.42 | 0.47 | 2.25 |
| Q9XWV2 | Y37D8A.2                            | 0.00 | 0.00 | 0.21 | 0.07 | 0.00 | 0.00 | 0.47 | 0.16 | 2.26 |
| Q22135 | CELE_T04A8.6 T04A8.6                | 0.20 | 0.00 | 0.00 | 0.07 | 0.46 | 0.00 | 0.00 | 0.15 | 2.32 |
| B7FAR9 | CELE_Y43F8B.1 Y43F8B.1              | 0.00 | 0.22 | 0.17 | 0.13 | 0.00 | 0.42 | 0.50 | 0.31 | 2.33 |
| O61709 | CELE_R119.3 R119.3                  | 0.00 | 0.21 | 0.00 | 0.07 | 0.00 | 0.50 | 0.00 | 0.17 | 2.34 |
| Q9BL46 | CELE_Y71H2AM.11 Y71H2AM.11          | 0.26 | 0.26 | 0.19 | 0.23 | 0.52 | 0.52 | 0.59 | 0.54 | 2.35 |
| P52715 | F13D12.6                            | 0.27 | 0.28 | 0.00 | 0.18 | 0.56 | 0.72 | 0.00 | 0.43 | 2.36 |
| G5EFV4 | hmg-1.1 CELE_Y48B6A.14 Y48B6A.14    | 0.23 | 0.00 | 0.00 | 0.08 | 0.55 | 0.00 | 0.00 | 0.18 | 2.39 |

|        |                                   |      |      |      |      |      |      |      |      |       |
|--------|-----------------------------------|------|------|------|------|------|------|------|------|-------|
| Q95YA9 | cas-1 CELE_F41G4.2 F41G4.2        | 0.00 | 0.21 | 0.00 | 0.07 | 0.00 | 0.51 | 0.00 | 0.17 | 2.39  |
| Q69Z16 | CELE_T12D8.10 T12D8.10            | 0.25 | 0.00 | 0.22 | 0.16 | 0.54 | 0.00 | 0.59 | 0.38 | 2.39  |
| Q9XTU6 | snr-6 Y49E10.15                   | 0.19 | 0.00 | 0.00 | 0.06 | 0.46 | 0.00 | 0.00 | 0.15 | 2.41  |
| P34255 | B0303.3                           | 0.31 | 0.00 | 0.31 | 0.20 | 0.51 | 0.59 | 0.41 | 0.51 | 2.48  |
| Q8I711 | gars-1 CELE_T10F2.1 T10F2.1       | 0.23 | 0.00 | 0.00 | 0.08 | 0.59 | 0.00 | 0.00 | 0.20 | 2.53  |
| O16368 | rpt-2 F29G9.5                     | 0.35 | 0.00 | 0.23 | 0.19 | 0.43 | 0.55 | 0.49 | 0.49 | 2.54  |
| G2HK03 | pqn-87 CELE_Y57A10A.18 Y57A10A.18 | 0.41 | 0.00 | 0.00 | 0.14 | 0.41 | 0.00 | 0.65 | 0.35 | 2.54  |
| Q09545 | sdhb-1 tag-55 F42A8.2             | 0.33 | 0.33 | 0.00 | 0.22 | 0.57 | 0.41 | 0.80 | 0.59 | 2.70  |
| G5EG85 | unc-70 bgs-1 CELE_K11C4.3 K11C4.3 | 0.00 | 0.41 | 0.00 | 0.14 | 0.83 | 0.33 | 0.00 | 0.39 | 2.81  |
| O17352 | aagr-4 CELE_F52D1.1 F52D1.1       | 0.00 | 0.00 | 0.31 | 0.10 | 0.36 | 0.00 | 0.50 | 0.29 | 2.82  |
| O62415 | lys-1 CELE_Y22F5A.4 Y22F5A.4      | 0.00 | 0.16 | 0.23 | 0.13 | 0.00 | 0.62 | 0.49 | 0.37 | 2.88  |
| Q9N4L8 | lpd-5 CELE_ZK973.10 ZK973.10      | 0.24 | 0.28 | 0.00 | 0.17 | 0.45 | 0.43 | 0.64 | 0.51 | 2.91  |
| O02252 | pcp-3 CELE_F23B2.11 F23B2.11      | 0.12 | 0.00 | 0.00 | 0.04 | 0.36 | 0.00 | 0.00 | 0.12 | 2.94  |
| Q22719 | CELE_T24B8.3 T24B8.3              | 0.00 | 0.33 | 0.30 | 0.21 | 0.71 | 0.58 | 0.60 | 0.63 | 3.00  |
| A7DIF0 | mrg-1 CELE_Y37D8A.9 Y37D8A.9      | 0.00 | 0.25 | 0.00 | 0.08 | 0.00 | 0.75 | 0.00 | 0.25 | 3.03  |
| Q23487 | CELE_ZK418.9 ZK418.9              | 0.00 | 0.25 | 0.00 | 0.08 | 0.00 | 0.75 | 0.00 | 0.25 | 3.07  |
| H2L0M0 | pod-2 CELE_W09B6.1 W09B6.1        | 0.00 | 0.28 | 0.00 | 0.09 | 0.00 | 0.85 | 0.00 | 0.28 | 3.08  |
| Q10661 | dpy-30 ZK863.6                    | 0.15 | 0.00 | 0.00 | 0.05 | 0.45 | 0.00 | 0.00 | 0.15 | 3.12  |
| C7FZU5 | C41G7.9 CELE_C41G7.9              | 0.00 | 0.00 | 0.33 | 0.11 | 0.00 | 0.62 | 0.42 | 0.35 | 3.17  |
| P91250 | col-73 CELE_F11G11.12 F11G11.12   | 0.00 | 0.21 | 0.20 | 0.13 | 0.43 | 0.42 | 0.44 | 0.43 | 3.20  |
| Q22170 | ile-2 CELE_T04G9.3 T04G9.3        | 0.00 | 0.38 | 0.00 | 0.13 | 0.68 | 0.62 | 0.00 | 0.43 | 3.39  |
| G5EGH7 | lon-8 Y59A8B.20                   | 0.17 | 0.00 | 0.00 | 0.06 | 0.61 | 0.00 | 0.00 | 0.20 | 3.63  |
| G5EE74 | nud-1 CELE_F53A2.4 F53A2.4        | 0.00 | 0.00 | 0.31 | 0.10 | 0.77 | 0.00 | 0.40 | 0.39 | 3.75  |
| O45864 | CELE_T27E9.2 T27E9.2              | 0.00 | 0.00 | 0.26 | 0.09 | 0.61 | 0.00 | 0.38 | 0.33 | 3.76  |
| Q9XWM1 | oig-2 CELE_Y38F1A.9 Y38F1A.9      | 0.21 | 0.00 | 0.19 | 0.13 | 0.44 | 0.59 | 0.50 | 0.51 | 3.77  |
| Q21313 | epi-1 K08C7.3                     | 0.25 | 0.21 | 0.00 | 0.15 | 0.46 | 0.67 | 0.60 | 0.58 | 3.82  |
| Q23089 | xpo-1 CELE_ZK742.1 ZK742.1        | 0.00 | 0.00 | 0.12 | 0.04 | 0.00 | 0.00 | 0.45 | 0.15 | 3.86  |
| O62432 | dpy-4 CELE_Y41E3.2 Y41E3.2        | 0.07 | 0.16 | 0.13 | 0.12 | 0.50 | 0.47 | 0.44 | 0.47 | 3.98  |
| O17287 | tomm-22 W10D9.5                   | 0.00 | 0.14 | 0.00 | 0.05 | 0.00 | 0.55 | 0.00 | 0.18 | 4.06  |
| Q09289 | C56G2.7                           | 0.00 | 0.24 | 0.00 | 0.08 | 0.00 | 0.51 | 0.49 | 0.33 | 4.12  |
| Q9XTT4 | ani-1 Y49E10.19                   | 0.00 | 0.07 | 0.00 | 0.02 | 0.00 | 0.30 | 0.00 | 0.10 | 4.27  |
| H2KYI5 | C06G3.5 CELE_C06G3.5              | 0.24 | 0.00 | 0.00 | 0.08 | 0.48 | 0.00 | 0.56 | 0.35 | 4.33  |
| H2L076 | ketn-1 CELE_F54E2.3 F54E2.3       | 0.00 | 0.00 | 0.25 | 0.08 | 0.00 | 0.59 | 0.51 | 0.37 | 4.45  |
| Q93896 | mct-3 CELE_M03B6.2 M03B6.2        | 0.00 | 0.32 | 0.00 | 0.11 | 1.00 | 0.42 | 0.00 | 0.47 | 4.51  |
| P34183 | hrs-1 syh-1 T11G6.1               | 0.39 | 0.00 | 0.00 | 0.13 | 0.49 | 0.63 | 0.68 | 0.60 | 4.58  |
| Q8T3G5 | egl-30 CELE_M01D7.7 M01D7.7       | 0.00 | 0.12 | 0.00 | 0.04 | 0.00 | 0.56 | 0.00 | 0.19 | 4.59  |
| Q9BL07 | Y54F10AM.8                        | 0.00 | 0.17 | 0.00 | 0.06 | 0.00 | 0.51 | 0.43 | 0.31 | 5.47  |
| Q93618 | F27D4.4                           | 0.00 | 0.30 | 0.00 | 0.10 | 0.67 | 0.45 | 0.63 | 0.58 | 5.89  |
| O02153 | grd-14 CELE_T01B10.2 T01B10.2     | 0.00 | 0.00 | 0.13 | 0.04 | 0.45 | 0.00 | 0.40 | 0.28 | 6.44  |
| Q22192 | ttr-14 CELE_T05A10.3 T05A10.3     | 0.00 | 0.00 | 0.16 | 0.05 | 0.68 | 0.00 | 0.50 | 0.40 | 7.56  |
| Q94360 | nduf-7 W10D5.2                    | 0.08 | 0.00 | 0.00 | 0.03 | 0.57 | 0.00 | 0.61 | 0.39 | 15.57 |
