# Supplementary material for: A muscle-epidermis-glia signaling axis sustains synaptic specificity during allometric growth in Caenorhabditis elegans
Source: eLife journal article supplement (doi:10.7554/elife.55890), 2020-04-07
Supplement: supp [file elife-55890-supp-v1.zip]

| Table S3. Construct information                     |                                                                                                                                                                                                                                                                                                                                                                                                                                                                                                                                                                                                                                                                                                                                                                                                                                                                                                        |        |                                                                                                                                  |
|-----------------------------------------------------|--------------------------------------------------------------------------------------------------------------------------------------------------------------------------------------------------------------------------------------------------------------------------------------------------------------------------------------------------------------------------------------------------------------------------------------------------------------------------------------------------------------------------------------------------------------------------------------------------------------------------------------------------------------------------------------------------------------------------------------------------------------------------------------------------------------------------------------------------------------------------------------------------------|--------|----------------------------------------------------------------------------------------------------------------------------------|
| Construct name                                      | Primers                                                                                                                                                                                                                                                                                                                                                                                                                                                                                                                                                                                                                                                                                                                                                                                                                                                                                                | Vector | Comments                                                                                                                         |
| <i>Pmig-17::SL2::GFP</i>                            | Forward: aaatatacATGAGTAAAggagaagaacttttactggag<br>Reverse: TTAATCATgtatattttcccttttcgcacacgttctacaac                                                                                                                                                                                                                                                                                                                                                                                                                                                                                                                                                                                                                                                                                                                                                                                                  | pDEST  | The Gateway system was described in (Norlia Basherudin et al., 2006).                                                            |
| <i>Pmig-17::mig-17</i>                              |                                                                                                                                                                                                                                                                                                                                                                                                                                                                                                                                                                                                                                                                                                                                                                                                                                                                                                        | pDEST  | SL2 and GFP were removed from <i>Pmig-17::SL2::GFP</i>                                                                           |
| <i>mig-17(shc19)</i> Cas9-sgRNA1                    | Forward: AATACTCGACTTCAAAATTAgttttagagctagaaatagcaagt<br>Reverse: TAATTTTGAAGTCGAGTATTcaagacatctcgcaatagg                                                                                                                                                                                                                                                                                                                                                                                                                                                                                                                                                                                                                                                                                                                                                                                              | pDD162 | pDD162 was described in (Daniel J Dickinson et al., 2015). This plasmid was constructed using the protocol of Dickinson 2015.    |
| <i>mig-17(shc19)</i> Cas9-sgRNA2                    | Forward: ACGTTCTACAACAAATCTCAgttttagagctagaaatagcaagt<br>Reverse: TGAGATTGTTGTAGAACGTcaagacatctcgcaatagg                                                                                                                                                                                                                                                                                                                                                                                                                                                                                                                                                                                                                                                                                                                                                                                               | pDD162 | pDD162 was described in (Daniel J Dickinson et al., 2015). This plasmid was constructed using the protocol of Dickinson 2015.    |
| <i>mig-17(shc19)</i> repair template of CRISPR/Cas9 | right and left homologous arm:<br>Forward: ttttGGCGCGCCTCTGACAATTCCTCAACGGATGC<br>Reverse: GACGCCTAGGgtaactaggcgggactcaagct<br>mutate NGG of sgRNA1:<br>Forward: AATTCAAAGACATGTTcAAATACTCGACTTC<br>Reverse: GAACATGTCTTTGAATTAATATCTTTACAATCCATC<br>mutate NGG of sgRNA2:<br>Forward: TCGTGAGATTGTTGTGTAGAACGTGTGCGAAAAAAG<br>Reverse: TTCTACAACAAATCTCACGAAAATCTTTTCGATTTA<br>insert mNeonGreen:<br>Forward: gacgACCGGTATGGTGTCTAAGGGCGAAGA<br>Reverse: tccccccgggCTGTACAGCTCGTCCATGC<br>Forward: tccccccgggTGAttggagtaataaacgtttcatatat<br>Reverse: gacgACCGGTGTATATTTTTCCTTTTTCGCACACGTTTC<br>insert Flag:<br>Forward: cgcggatccttcagGGAGCCGGATCTG<br>Reverse: tccccccgggTCTCTTGTCATCGTCATCCTTG<br>Forward: tccccccgggTGAttggagtaataaacgtttcatatat<br>Reverse: cgcggatccCTTGTACAGCTCGTCCATGC<br>verification of knock-in animals:<br>Forward: GCTGGAACCTGGATCGCAAC<br>Reverse: GAAGTGACCTGTTGAGGTT | pSM    | <i>mig-17(shc19)</i> contains <i>mig-17::mNeonGreen::3×flag</i> . This plasmid was constructed by enzyme digest and T4 ligation. |
| <i>mig-17(shc8)</i> Cas9-sgRNA1                     | Forward: AGGTCTCACTTCGTTGATTAgtttagagctagaaatagcaagt<br>Reverse: TAATCAACGAAGTGAGACCTcaagacatctcgcaatagg                                                                                                                                                                                                                                                                                                                                                                                                                                                                                                                                                                                                                                                                                                                                                                                               | pDD162 | pDD162 was described in (Daniel J Dickinson et al., 2015). This plasmid was constructed using the protocol of Dickinson 2015.    |
| <i>mig-17(shc8)</i> Cas9-sgRNA2                     | Forward: TTGATTATGGCTCACGAAATgttttagagctagaaatagcaagt<br>Reverse: ATTTTCGTGAGCCATAATCAACaagacatctcgcaatagg                                                                                                                                                                                                                                                                                                                                                                                                                                                                                                                                                                                                                                                                                                                                                                                             | pDD162 | pDD162 was described in (Daniel J Dickinson et al., 2015). This plasmid was constructed using the protocol of Dickinson 2015.    |

|                                                    |                                                                                                                                                                                                                                                                                                               |           |                                                                                                                                                                                         |
|----------------------------------------------------|---------------------------------------------------------------------------------------------------------------------------------------------------------------------------------------------------------------------------------------------------------------------------------------------------------------|-----------|-----------------------------------------------------------------------------------------------------------------------------------------------------------------------------------------|
| <i>mig-17(shc8)</i> repair template of CRISPR/Cas9 | Forward: ttttGGCGCGCCtttgggctgttaggagtagttc<br>Reverse: gacgACCGGTgttctggaccacaaggaga<br>Forward: TTAATCATGGCCCATGCAATC GGTCACCTCgtgagtaaact<br>Reverse:<br>ATGGGCCATGATTAATGAGGTAAGACCTGCTCCAATGTCCTCTA<br>verification of mutant animals:<br>Forward: GACGTGAGAAGCAACAAAGC<br>Reverse: GAAGTGGACCTGTTGAGGTT | pSM       | <i>mig-17(shc8)</i> contains <i>mig-17(E303A)</i> where the protease catalytic site of MIG-17 is altered from E303 to A. This plasmid was constructed by enzyme digest and T4 ligation. |
| <i>Pmig-17::mig-17(E303A)::GFP</i>                 |                                                                                                                                                                                                                                                                                                               | pSM       | A gift from the lab of Kiyoji Nishiwaki                                                                                                                                                 |
| <i>Phlh-17::mig-17</i>                             | Forward: TACCCATCCGCAGACACTG<br>Reverse: AAGCTCCTGAGTCTTGTTTCG                                                                                                                                                                                                                                                | pDEST     | <i>Phlh-17</i> is published in (McMiller and Johnson, 2005). The Gateway system was described in (Norlia Basherudin et al., 2006).                                                      |
| <i>Prab-3::mig-17</i>                              |                                                                                                                                                                                                                                                                                                               | pDEST     | <i>Prab-3</i> was described in (Nonet et al., 1997). From the lab of Daniel A. Colón-Ramos.                                                                                             |
| <i>Ppdy-7::mig-17</i>                              |                                                                                                                                                                                                                                                                                                               | pDEST     | <i>Pdpy-7</i> is published in (Bülow et al., 2004). The Gateway system was described in (Norlia Basherudin et al., 2006).                                                               |
| <i>Pmyo-3::mig-17</i>                              |                                                                                                                                                                                                                                                                                                               | pDEST     | <i>Pmyo-3</i> was described in (Okkema et al., 1993). The Gateway system was described in (Norlia Basherudin et al., 2006).                                                             |
| <i>dgn-1 RNAi</i>                                  | Forward: atttgcggccgcAACCCCTCAAGTTTACACTGT<br>Reverse: atttgcggccgcAGTGAGAATGACCATTGACC                                                                                                                                                                                                                       | pPD129.36 | The full length of <i>dgn-1 cDNA</i> .                                                                                                                                                  |
| <i>Pdpy-7::egl-15(5A)</i>                          |                                                                                                                                                                                                                                                                                                               | pDEST     | <i>Pdpy-7</i> is published in (Bülow et al., 2004). The Gateway system was described in (Norlia Basherudin et al., 2006).                                                               |
| <i>Prab-3::mCherry</i>                             |                                                                                                                                                                                                                                                                                                               |           | <i>Prab-3</i> was described in (Nonet et al., 1997). From the lab of Daniel A. Colón-Ramos.                                                                                             |
| <i>Pttx-3g::GFP::rab-3</i>                         |                                                                                                                                                                                                                                                                                                               |           | <i>Pttx-3g</i> was described in (Wenick and Hobert, 2004). From the lab of Daniel A. Colón-Ramos.                                                                                       |
| <i>Phlh-17::mCherry</i>                            |                                                                                                                                                                                                                                                                                                               |           | <i>Phlh-17</i> is published in (McMiller and Johnson, 2005). From the lab of Daniel A. Colón-Ramos.                                                                                     |
| <i>Pdpy-4::mCherry</i>                             |                                                                                                                                                                                                                                                                                                               |           | From the lab of Daniel A. Colón-Ramos.                                                                                                                                                  |
