# Supplementary material for: A muscle-epidermis-glia signaling axis sustains synaptic specificity during allometric growth in Caenorhabditis elegans
Source: eLife. 2020 Apr 7;9:e55890. doi: 10.7554/eLife.55890 (PMC7164957; doi:10.7554/eLife.55890)
Supplement: Supplementary file 3. — The name of constructs, the primers and the vectors (for building the constructs). Detailed cloning information is available upon request. [file elife-55890-supp3.xlsx]

## Sheet: 工作表1
Table S3. Construct information
Construct name	Primers	Vector	Comments
Pmig-17::SL2::GFP	Forward: aaatatacATGAGTAAAggagaagaacttttcactggag Reverse: TTACTCATgtatatttttccttttttcgcacacgttctacaac	pDEST	The Gateway system was described in (Basherudin and Curtis, 2006).
Pmig-17::mig-17		pDEST	SL2 and GFP were removed from Pmig-17::SL2::GFP
mig-17(shc19) Cas9-sgRNA1	Forward: AATACTCGACTTCAAAATTAgttttagagctagaaatagcaagt Reverse: TAATTTTGAAGTCGAGTATTcaagacatctcgcaatagg	pDD162	pDD162 was described in (Dickinson et al., 2015). This plasmid was constructed using the protocol of Dickinson 2015.
mig-17(shc19) Cas9-sgRNA2	Forward: ACGTTCTACAACAAATCTCAgttttagagctagaaatagcaagt Reverse: TGAGATTTGTTGTAGAACGTcaagacatctcgcaatagg	pDD162	pDD162 was described in (Dickinson et al., 2015). This plasmid was constructed using the protocol of Dickinson 2015.
mig-17(shc19) repair template of CRISPR/Cas9	right and left homologous arm: Forward: ttttGGCGCGCCTCTGACAATTCCTCAACGGATGC Reverse: GACGCCTAGGgtaactaggcgggactcaagct mutate NGG of sgRNA1: Forward: AATTCAAAGACATGTTCtAAATACTCGACTTC Reverse: GAACATGTCTTTGAATTAATATCTTTACAATCCATC mutate NGG of sgRNA2: Forward: TCGTGAGATTTGTTGTAGAACGTGTGCGAAAAAAG Reverse: TTCTACAACAAATCTCACGAAAATCTTTCGATTTA insert mNeonGreen: Forward: gacgACCGGTATGGTGTCTAAGGGCGAAGA …	pSM	mig-17(shc19) contains mig-17::mNeonGreen::3×flag.This plasmid was constructed by enzyme digest and T4 ligation.
mig-17(shc8) Cas9-sgRNA1	Forward: AGGTCTCACTTCGTTGATTAgttttagagctagaaatagcaagt Reverse: TAATCAACGAAGTGAGACCTcaagacatctcgcaatagg	pDD162	pDD162 was described in (Dickinson et al., 2015). This plasmid was constructed using the protocol of Dickinson 2015.
mig-17(shc8) Cas9-sgRNA2	Forward: TTGATTATGGCTCACGAAATgttttagagctagaaatagcaagt Reverse: ATTTCGTGAGCCATAATCAAcaagacatctcgcaatagg	pDD162	pDD162 was described in (Dickinson et al., 2015). This plasmid was constructed using the protocol of Dickinson 2015.
mig-17(shc8) repair template of CRISPR/Cas9	Forward: ttttGGCGCGCCtttgggctgttaggagtagttc Reverse: gacgACCGGTgttgctggaccacaaggaga Forward: TTAATCATGGCCCATGCAATC GGTCACTCgtgagttaaact Reverse: ATGGGCCATGATTAATGAGGTAAGACCTGCTCCAATGTCCTCTA verifiction of mutant animals: Forward: GACGTGAGAAGCAACAAAGC Reverse: GAAGTGGACCTGTTGAGGTT	pSM	mig-17(shc8) contains mig-17(E303A) where the protease catalytic site of MIG-17 is altered from E303 to A. This plasmid was constructed by enzyme digest and T4 ligation.
Pmig-17::mig-17(E303A)::GFP		pSM	A gift from the lab of Kiyoji Nishiwaki
Phlh-17::mig-17	Forward: TACCCATCCGCAGACACTG Reverse: AAGCTCCTGAGTCTTGTTCG	pDEST	Phlh-17 is published in (McMiller and Johnson, 2005). The Gateway system was described in (Basherudin and Curtis, 2006).
Prab-3::mig-17		pDEST	Prab-3 was described in (Nonet et al., 1997). From the lab of Daniel A. Colón-Ramos.
Pdpy-7::mig-17		pDEST	Pdpy-7 is published in (Bulow et al., 2004). The Gateway system was described in (Basherudin and Curtis, 2006).
Pmyo-3::mig-17		pDEST	Pmyo-3 was described in (Okkema et al., 1993). The Gateway system was described in(Basherudin and Curtis, 2006).
dgn-1 RNAi	Forward: atttgcggccgcAACCCTCAAGTTTACACTGT Reverse: atttgcggccgcAGTGAGAATGACCATTGACC	pPD129.36	The full length of dgn-1 cDNA.
Pdpy-7::egl-15(5A)		pDEST	Pdpy-7 is published in (Bulow et al., 2004).The Gateway system was described in (Basherudin and Curtis, 2006).
Prab-3::mCherry			Prab-3 was described in (Nonet et al., 1997). From the lab of Daniel A. Colón-Ramos.
Pttx-3g::GFP::rab-3			Pttx-3g was described in (Wenick and Hobert, 2004). From the lab of Daniel A. Colón-Ramos.
Phlh-17::mCherry			Phlh-17 is published in (McMiller and Johnson, 2005). From the lab of Daniel A. Colón-Ramos.
Pdpy-4::mCherry			From the lab of Daniel A. Colón-Ramos.
Pmyo-3::GFP			Pmyo-3 was described in (Okkema et al., 1993). The Gateway system was described in (Basherudin and Curtis, 2006).
Pttx-3g::GFP		pSM	Pttx-3g was described in (Wenick and Hobert, 2004). From the lab of Daniel A. Colón-Ramos.
Phlh-17::GFP		pSM	Phlh-17 is published in (McMiller and Johnson, 2005). From the lab of Daniel A. Colón-Ramos.
Pttx-3g::mig-17		pSM	Pttx-3g was described in (Wenick and Hobert, 2004). From the lab of Daniel A. Colón-Ramos.
Plim-4::mig-17	Forward: AAGTTGcccccatgcagttcaaatactg Reverse: GAGACAGCcggaaataacatcctttaca	pSM	lim-4 expressed in nerve ring was described in (Christensen et al., 2020)
Reference
Basherudin, N., Curtis, M.D. (2006). Identification of positive GATEWAY expression clones when both the pENTRY and pDEST vectors contain the same marker for bacterial selection. CSH Protoc 2006.
Bulow, H.E., Boulin, T., and Hobert, O. (2004). Differential functions of the C. elegans FGF receptor in axon outgrowth and maintenance of axon position. Neuron 42, 367-374.
Christensen EL, Beasley A, Radchuk J.,et al. (2020). ngn-1/neurogenin Activates Transcription of Multiple Terminal Selector Transcription Factors in the Caenorhabditis elegans Nervous System. G3 (Bethesda).
Dickinson, D.J., Pani, A.M., Heppert, J.K., Higgins, C.D., and Goldstein, B. (2015). Streamlined Genome Engineering with a Self-Excising Drug Selection Cassette. Genetics 200, 1035-1049.
McMiller, T.L., and Johnson, C.M. (2005). Molecular characterization of HLH-17, a C. elegans bHLH protein required for normal larval development. Gene 356, 1-10.
Nonet, M.L., Staunton, J.E., Kilgard, M.P.,et al.. (1997). Caenorhabditis elegans rab-3 mutant synapses exhibit impaired function and are partially depleted of vesicles. J Neurosci 17, 8061-8073.
Okkema, P.G., Harrison, S.W., Plunger, V., Aryana, A., and Fire, A. (1993). Sequence requirements for myosin gene expression and regulation in Caenorhabditis elegans. Genetics 135, 385-404.
Wenick, A.S., and Hobert, O. (2004). Genomic cis-regulatory architecture and trans-acting regulators of a single interneuron-specific gene battery in C. elegans. Dev Cell 6, 757-770.
