# Supplementary figures and images for: A muscle-epidermis-glia signaling axis sustains synaptic specificity during allometric growth in Caenorhabditis elegans
Source: eLife journal article supplement (doi:10.7554/elife.55890), 2020-04-07

**Figure S3**

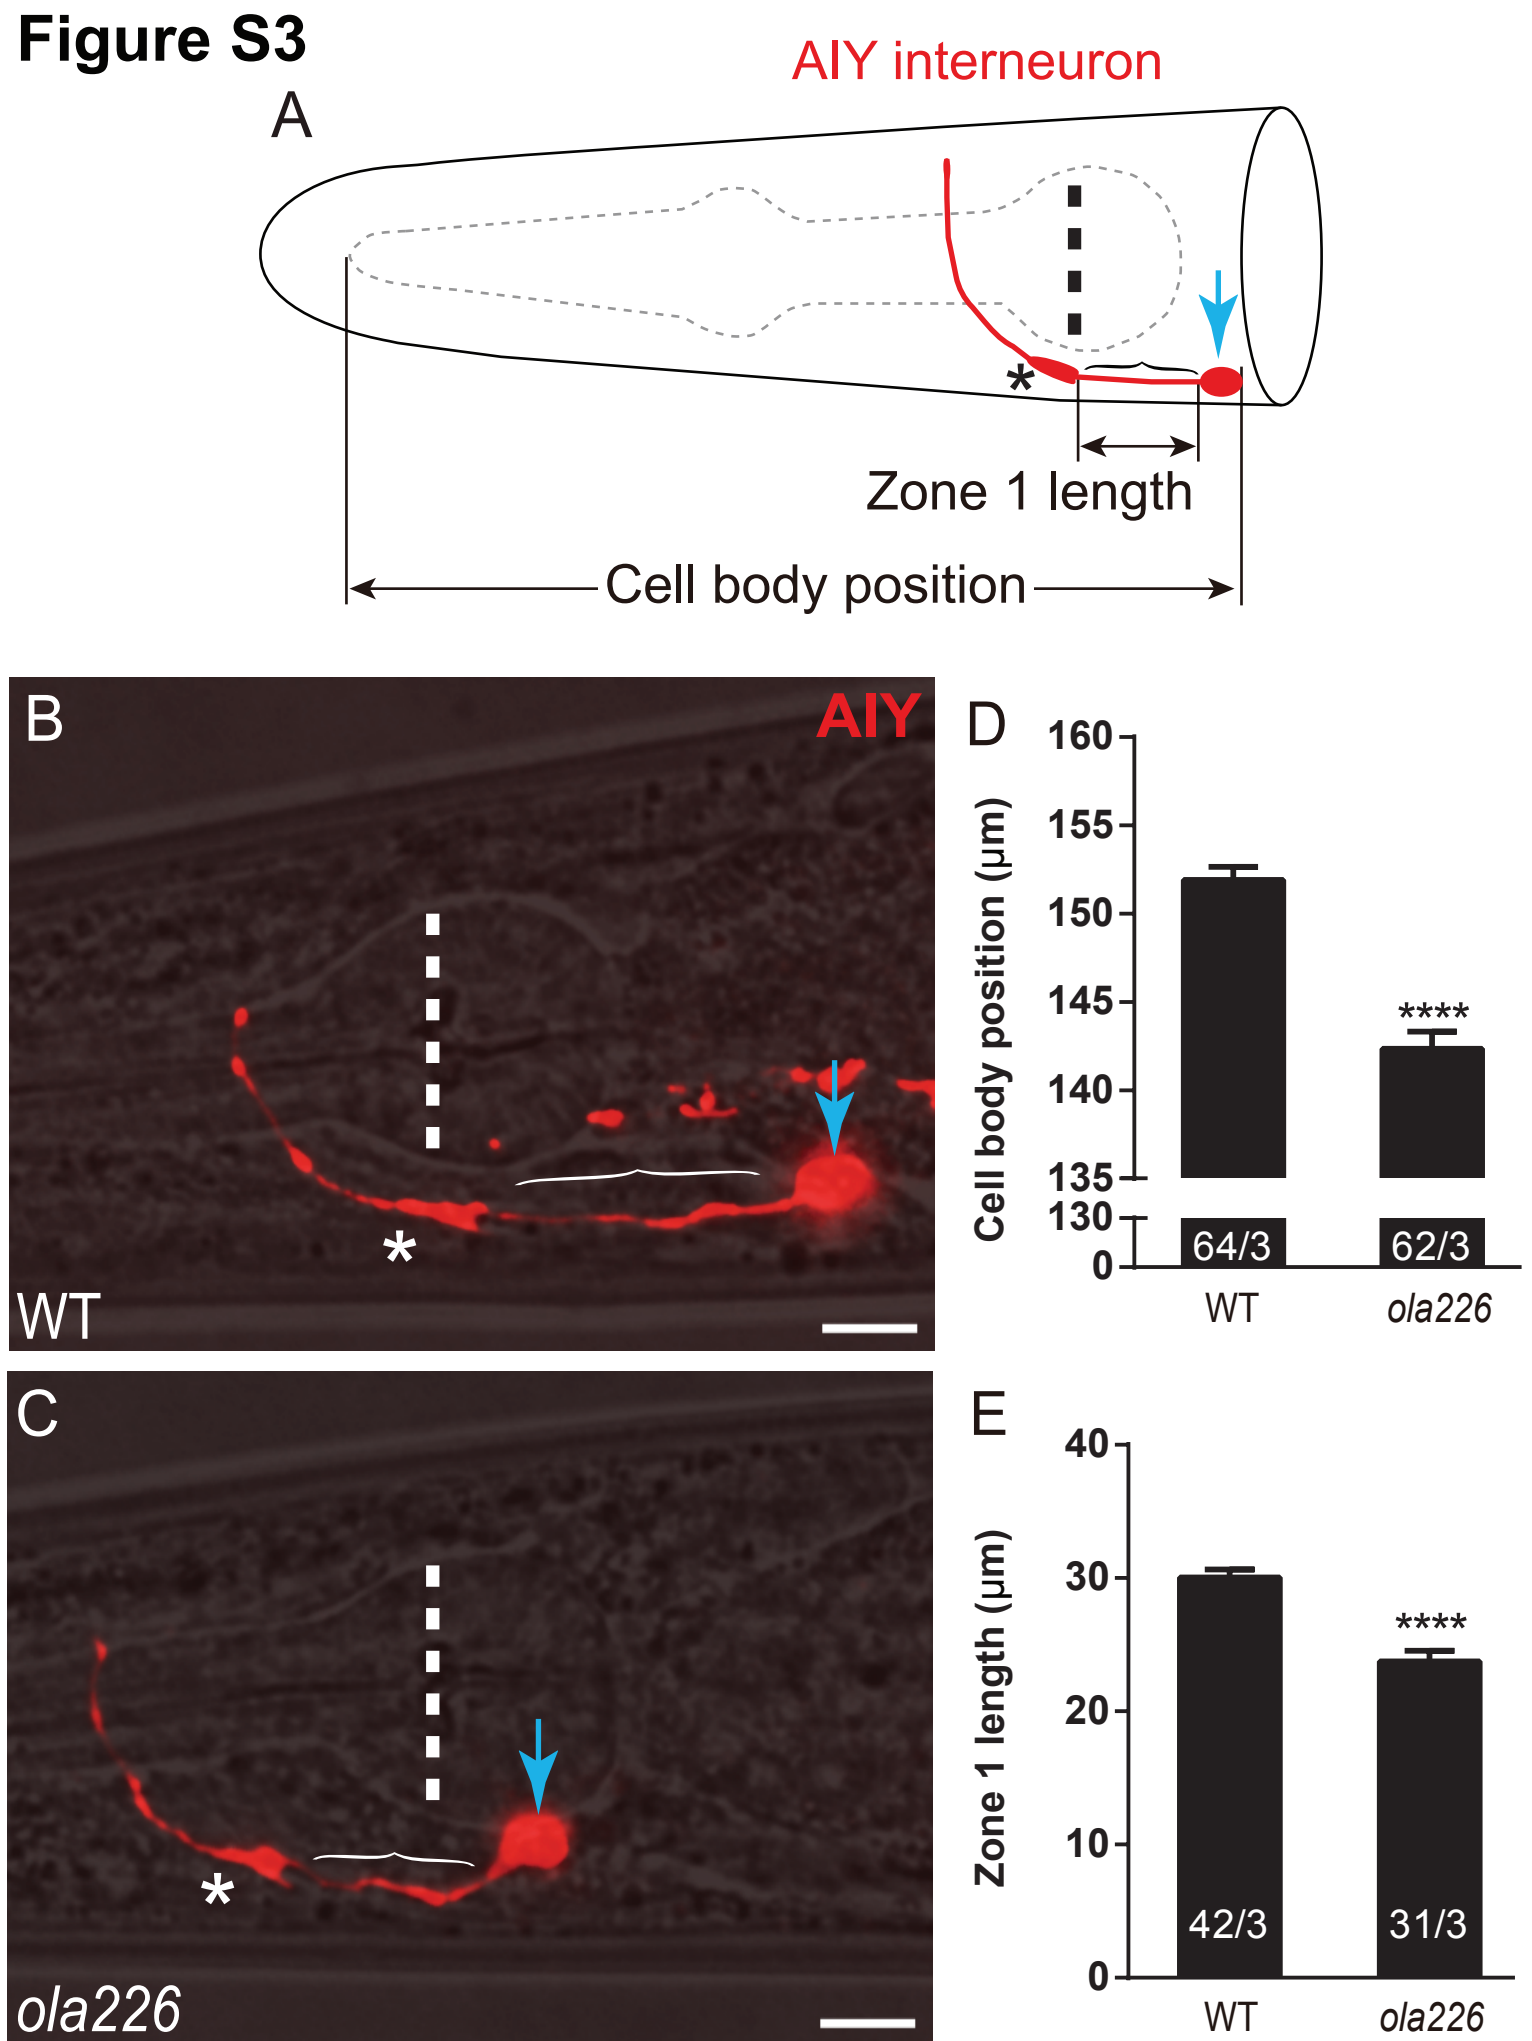

Supplement: supp [file elife-55890-supp-v1.zip]

Figure S1

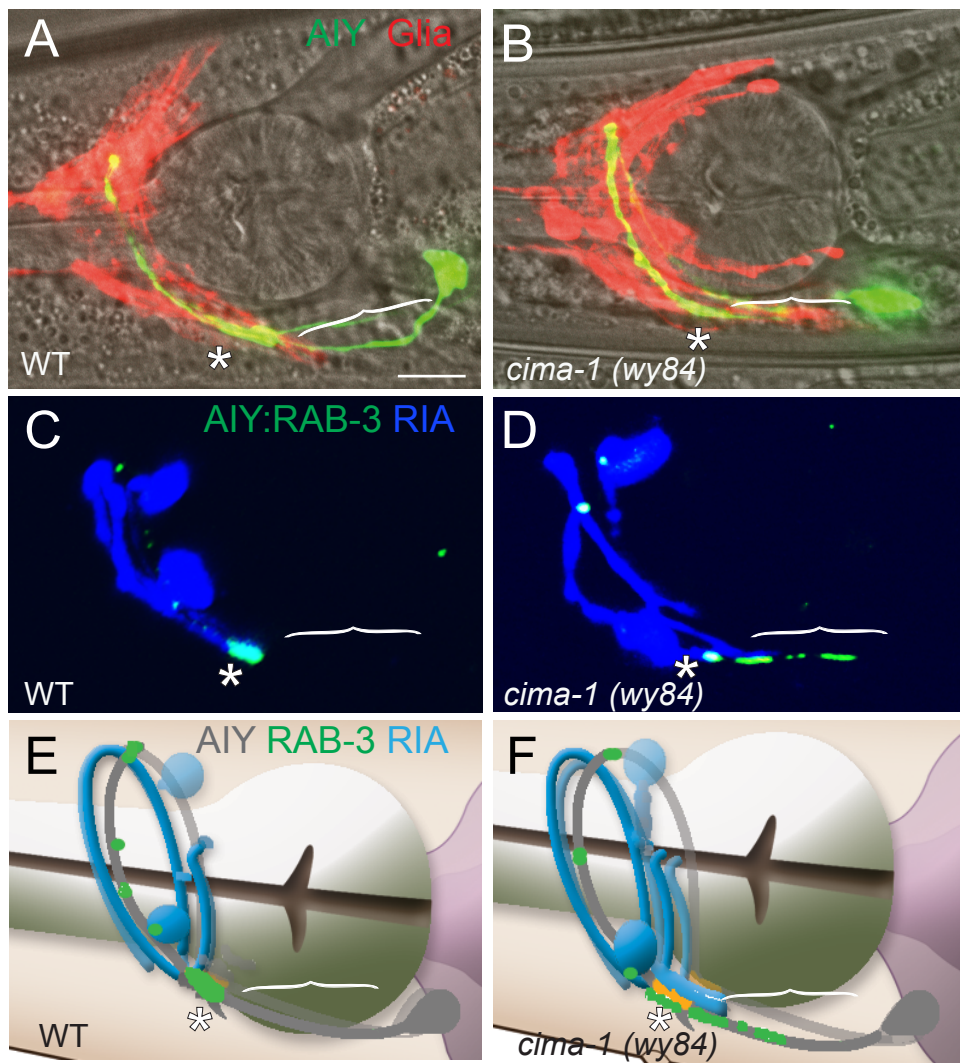

Supplement: supp [file elife-55890-supp-v1.zip]

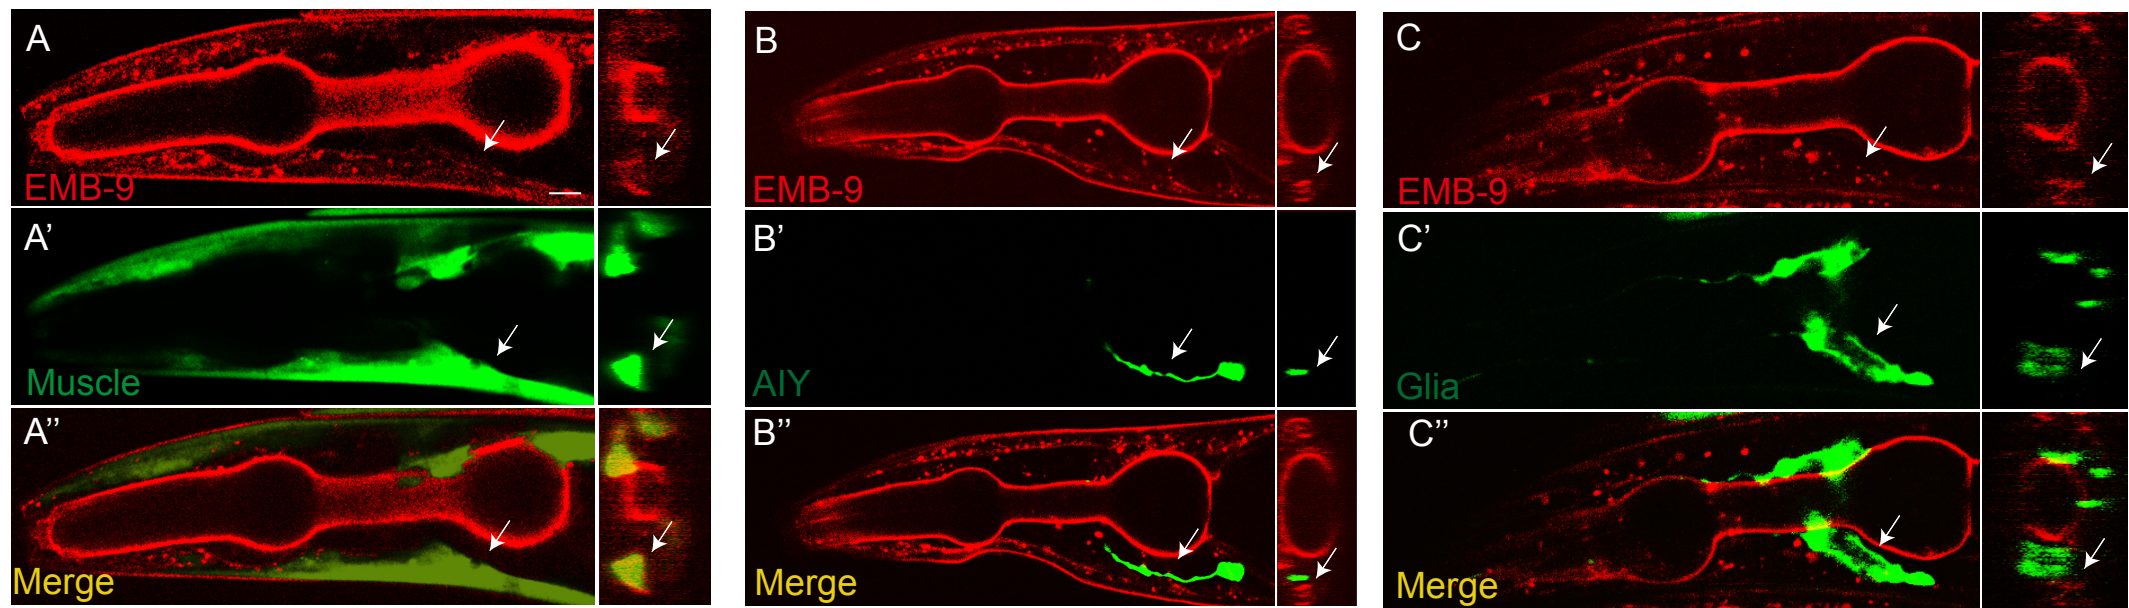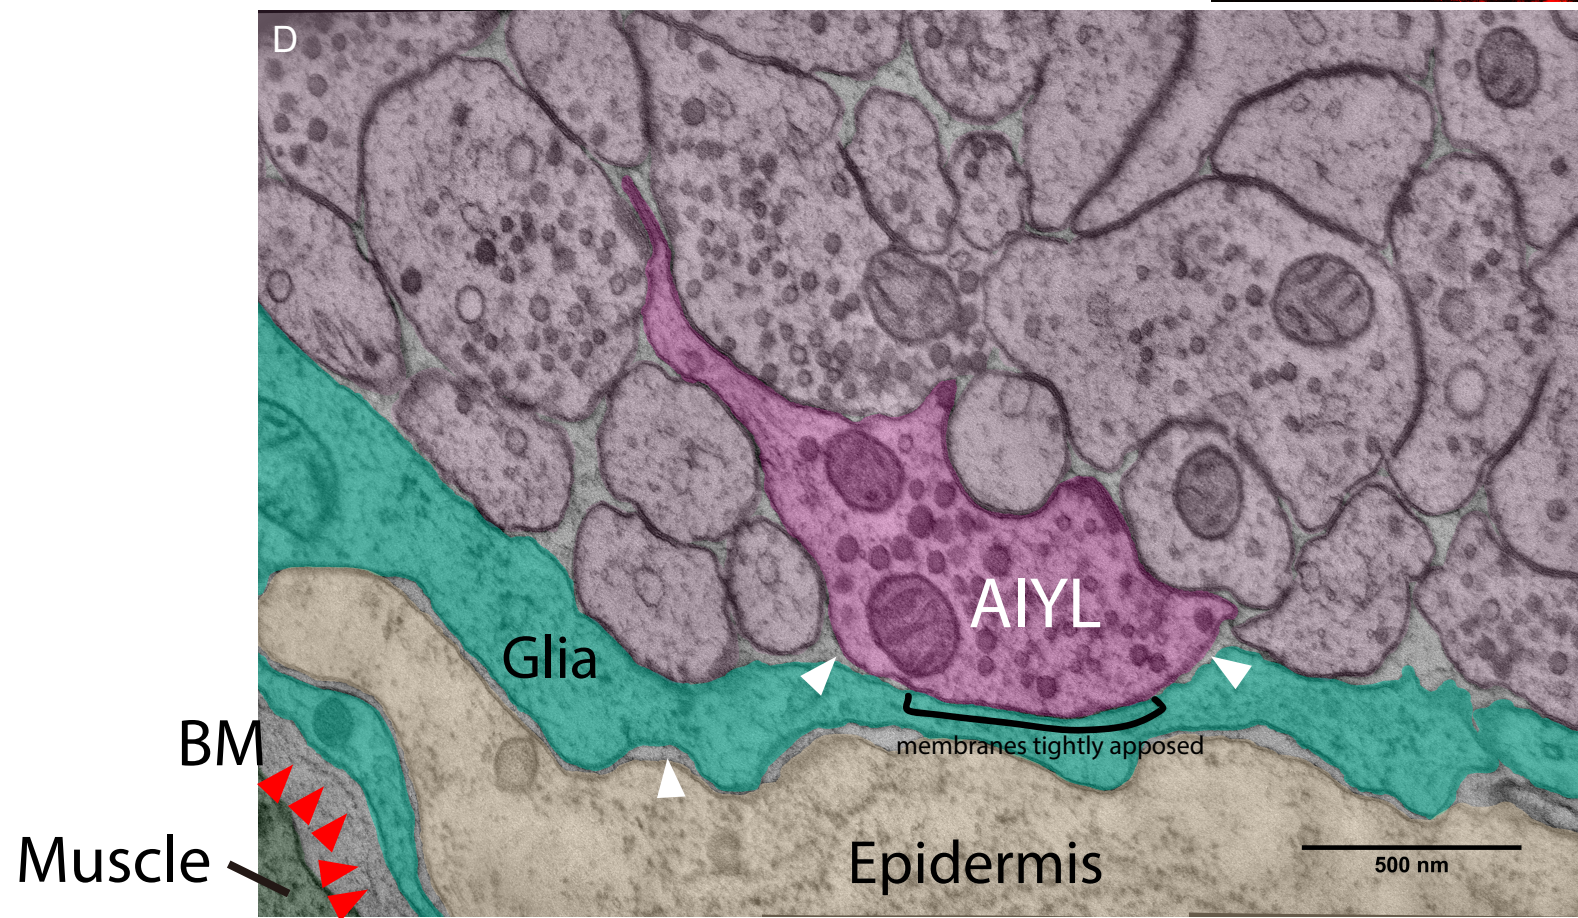

Supplement: supp [file elife-55890-supp-v1.zip]

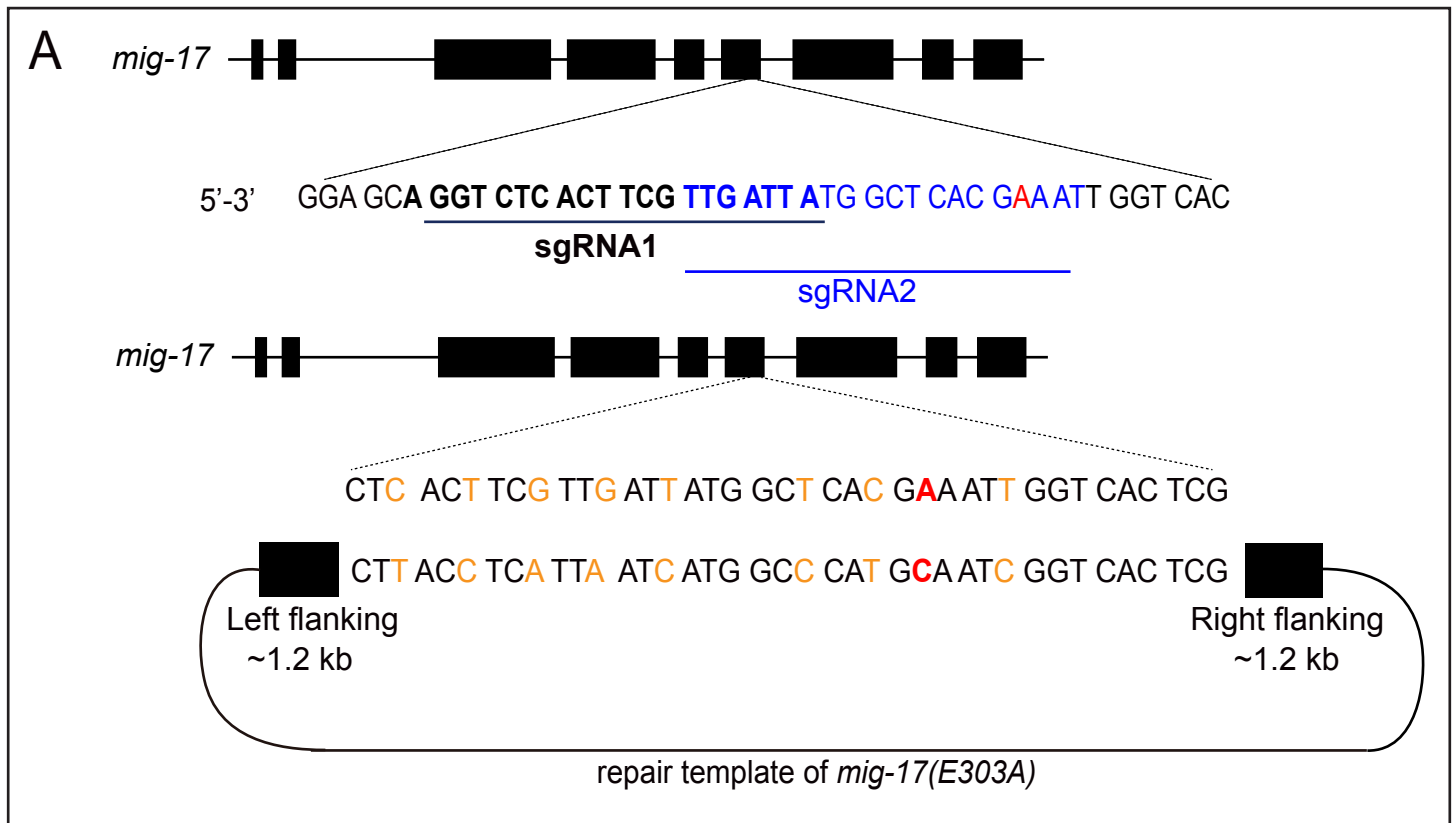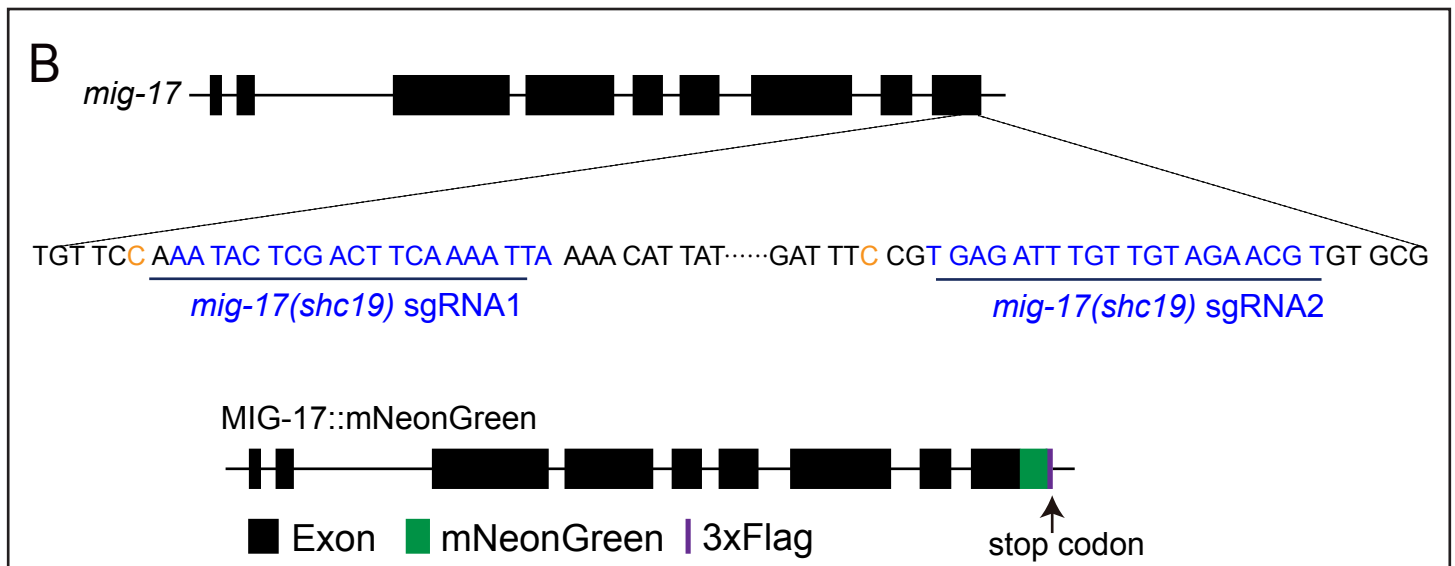

**Figure S7**

Supplement: supp [file elife-55890-supp-v1.zip]

# Figure S2

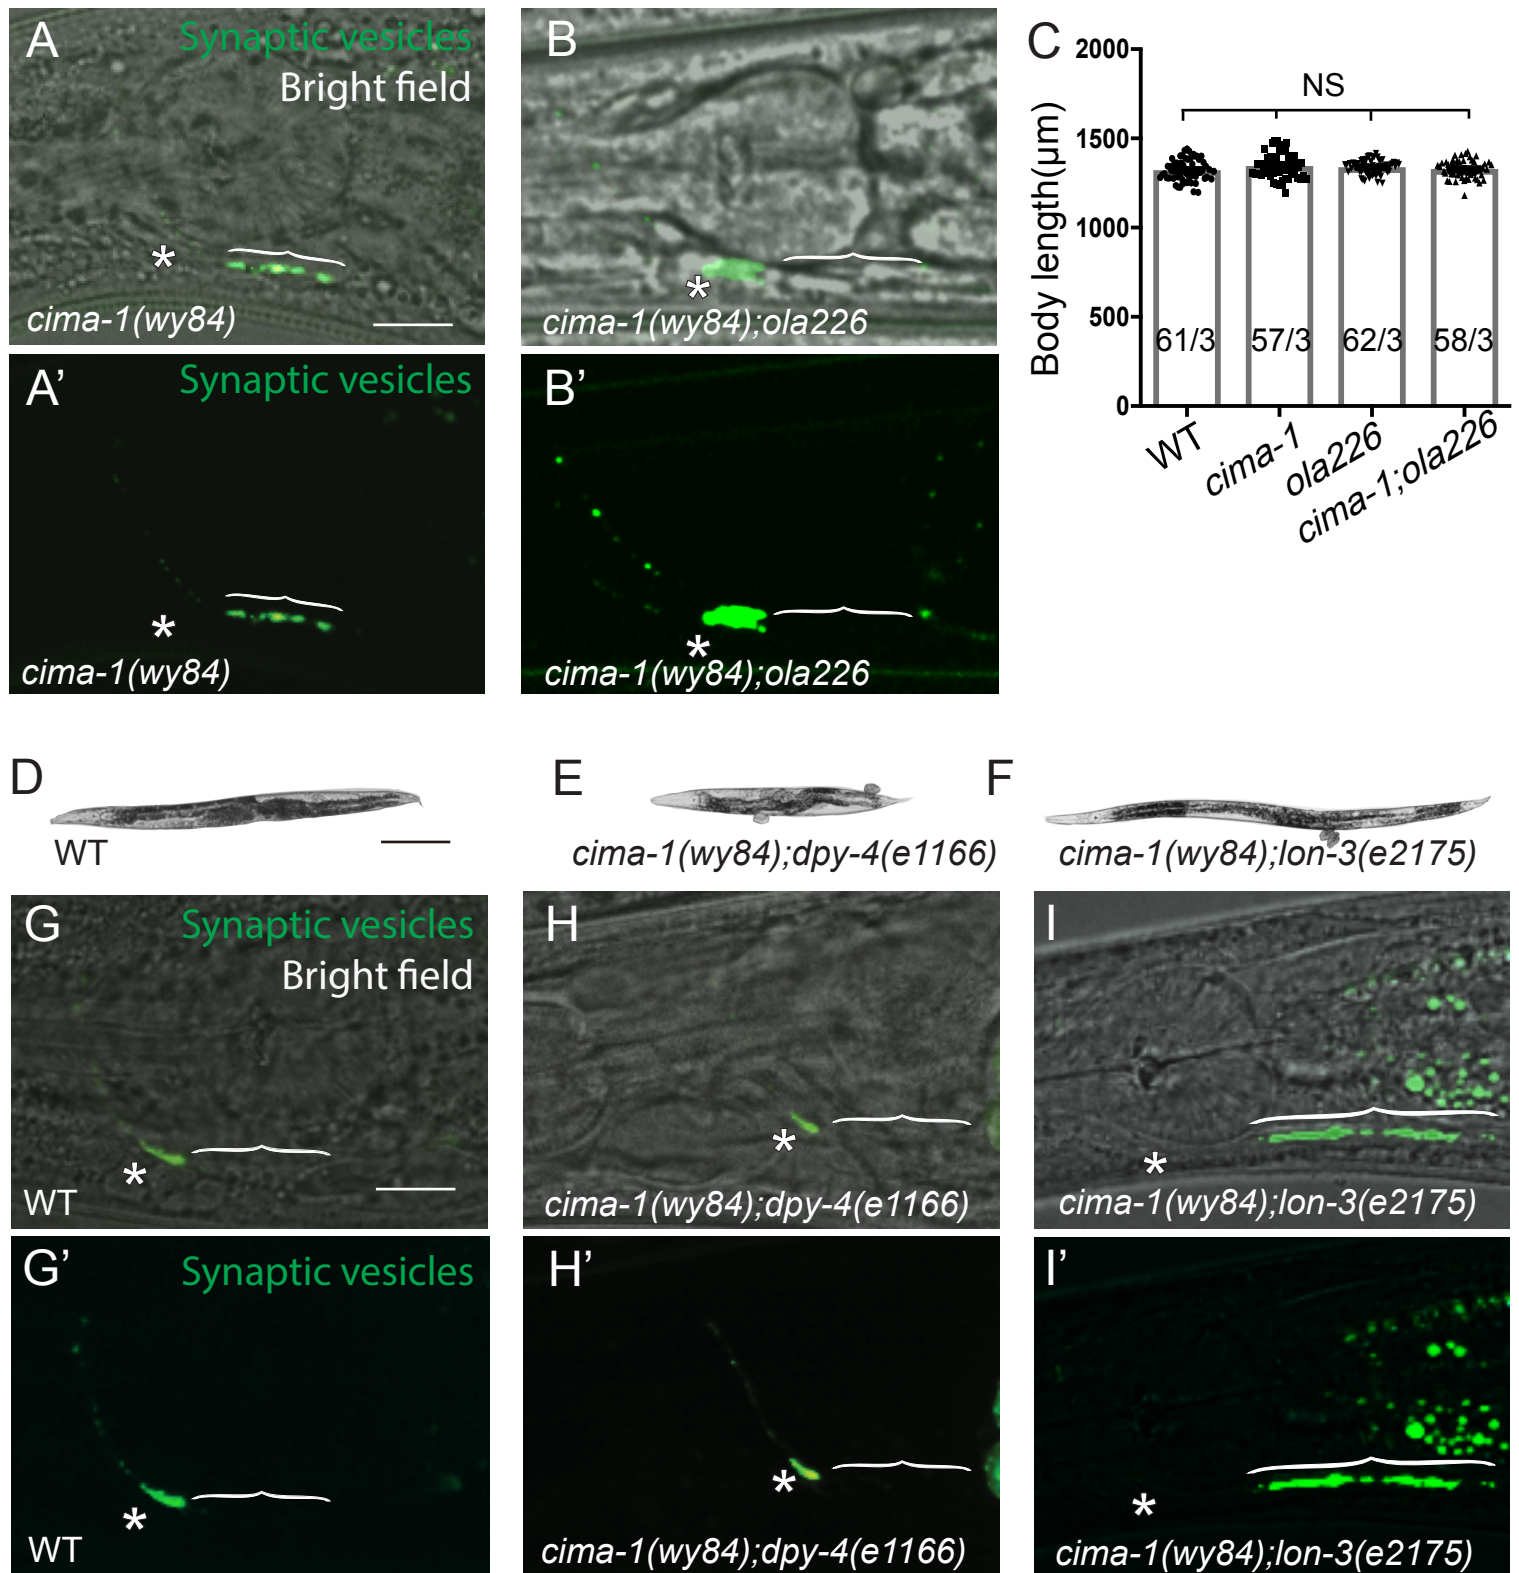

Supplement: supp [file elife-55890-supp-v1.zip]

## Figure S5

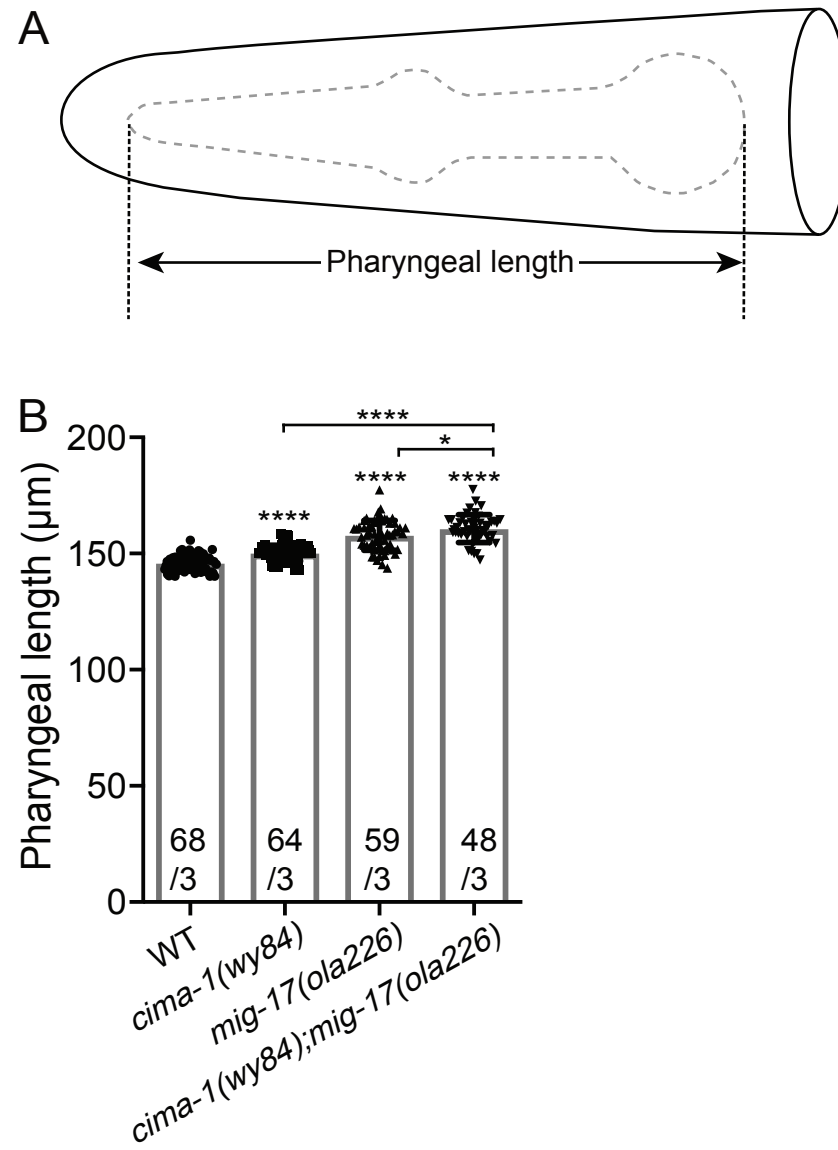

Supplement: supp [file elife-55890-supp-v1.zip]

# Figure S6

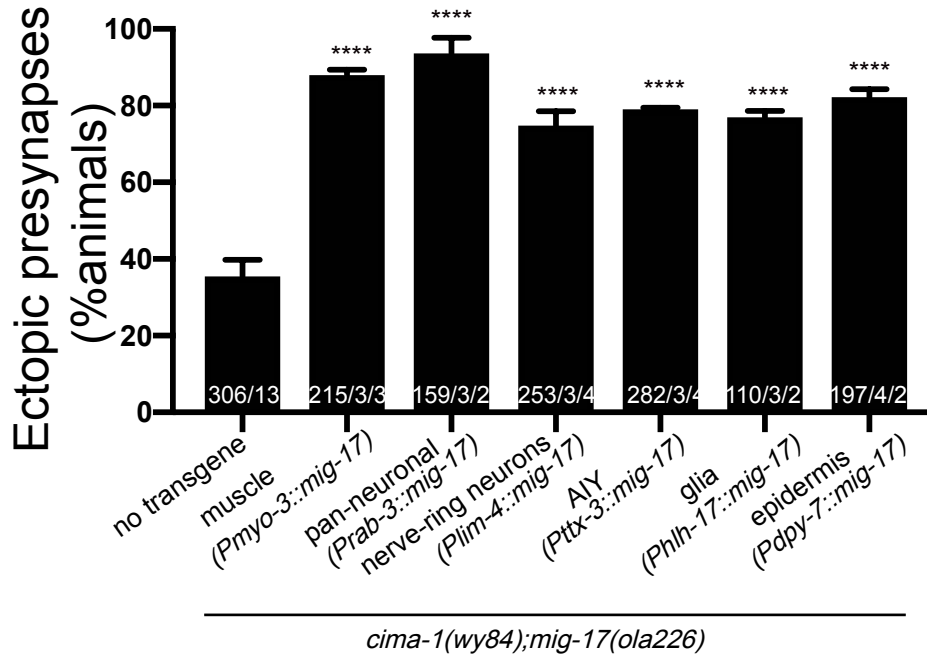

Supplement: supp [file elife-55890-supp-v1.zip]

# Figure S8

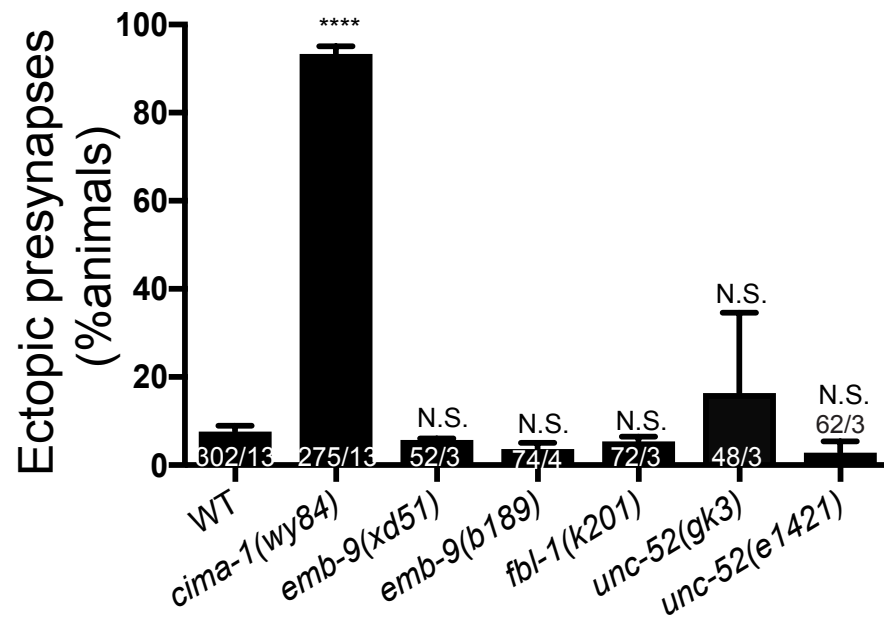

Supplement: supp [file elife-55890-supp-v1.zip]

Figure S4

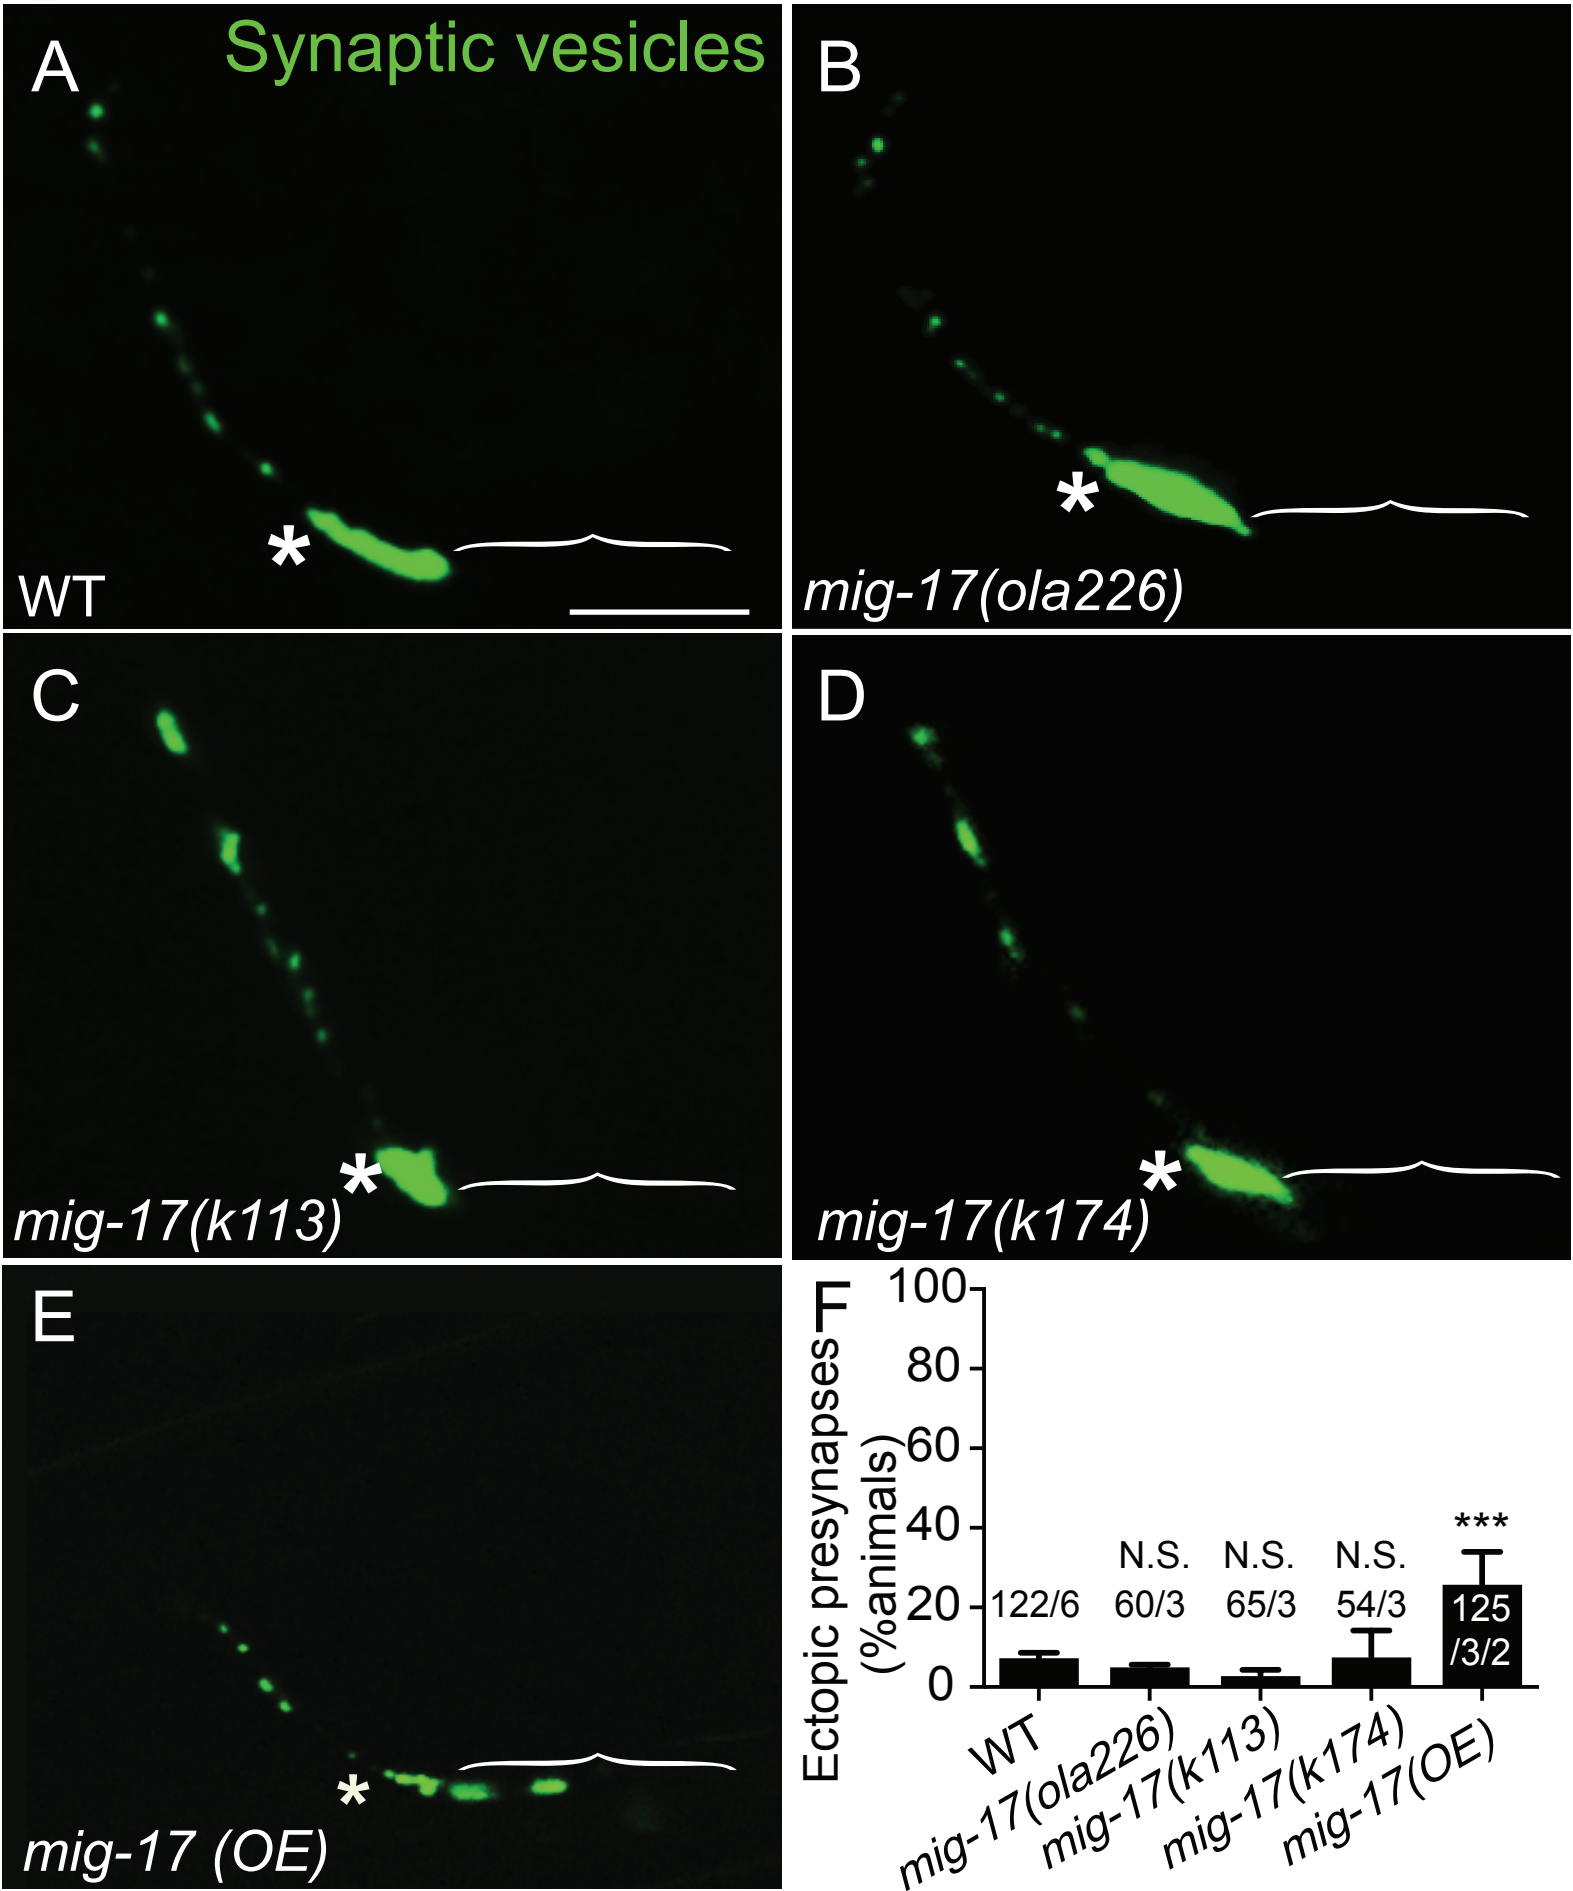

Supplement: supp [file elife-55890-supp-v1.zip]
